# Supplementary material
Source: Royal Society of Chemistry journal article supplement (doi:10.1039/d6gc00126b)
Supplement: d6gc00126b1.pdf [file d6gc00126b1.pdf]

## Supporting Information

1  
2  
3  
4  
5  
6  
7  
8  
9  
10  
11  
12  
13  
14  
15  
16  
17  
18  
19  
20  
21  
22  
23  
24  
25  
26  
27  
28  
29

### **Structure-guided engineering of an aromatic dioxygenase from *Coniochaeta pulveracea* for improved catalysis of lignin-related aromatic olefins**

Lei Yu<sup>a,b†</sup>, Yunjian Ma<sup>a,b†</sup>, Chenhao Feng<sup>a</sup>, Frank Hollmann<sup>c</sup>, Ren Wei<sup>d</sup>, Fanghua Wang<sup>a</sup>, Shengjie Guo<sup>a</sup>, Bin  
Wu<sup>a,c,\*</sup> & Yonghua Wang<sup>a,f\*</sup>

<sup>a</sup> School of Food Science and Engineering, South China University of Technology, Guangzhou 510640, China

<sup>b</sup> State Key Laboratory of Advanced Papermaking and Paper-based Materials, South China University of Technology,  
Guangzhou 510640, China

<sup>c</sup> Department of Biotechnology, Delft University of Technology, van der Maasweg 9, 2629HZ, Delft, The Netherlands

<sup>d</sup> Department of Biotechnology and Enzyme Catalysis, Institute of Biochemistry, University of Greifswald, D-17489  
Greifswald, Germany

<sup>e</sup> College of Light Chemical Industry and Materials Engineering, Shunde Polytechnic University, Foshan, 528333,  
China.

<sup>f</sup> Southern Marine Science and Engineering Guangdong Laboratory (Guangzhou), Guangdong, 511458, China

†Contributed equally to this work

\*Corresponding author (BinWu, email: [BinWu9070@scut.edu.cn](mailto:BinWu9070@scut.edu.cn); Yonghua Wang, email: [yonghw@scut.edu.cn](mailto:yonghw@scut.edu.cn))

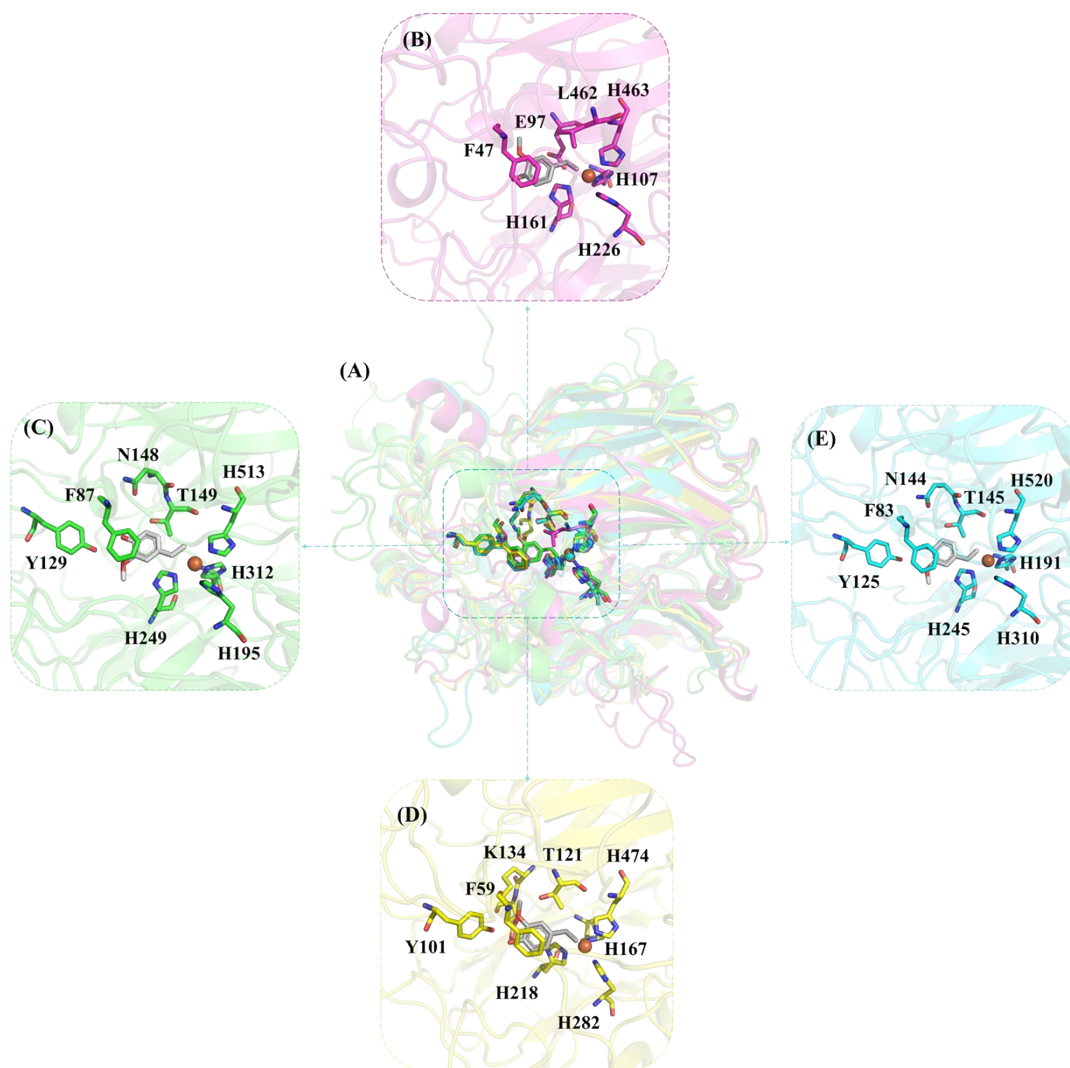

32

33

34 **Figure S1.** Molecular docking analysis of 4-vinylguaiacol with various ADO enzymes. (A) Structural superposition35 of the AlphaFold2 models of *Dsp*ADO (pink), *Cpu*ADO (green), *Lsp*ADO (yellow), and *Slo*ADO (cyan). (B-E) Active

36 site pockets of these enzymes, respectively, with interacting residues highlighted as sticks.

37

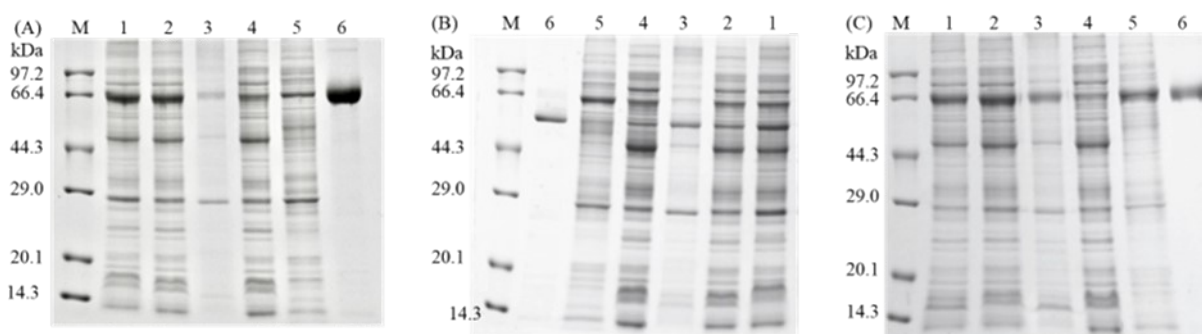

38

39

40 **Figure S2.** Purification of the recombinant ADOs. (A)-(C) represent the SDS-PAGE gel electrophoresis of the purified

41 *Tth*ADO, *Lsp*ADO and *Cpu*ADO, respectively. Lane M: protein marker, lane 1: cell extract of recombinant *E.coli*  
 42 BL21 (DE3) strain, lane 2: supernatant of induced cell lysate, lane 3: induced cell debris, lane 4: Sample of the cell  
 43 extract after passing through the nickel column; lane 5: Protein sample after impurity removal with 50 mM imidazole;  
 44 lane 6: Purified ADOs after 200 mM imidazole elution.

45  
 46  
 47

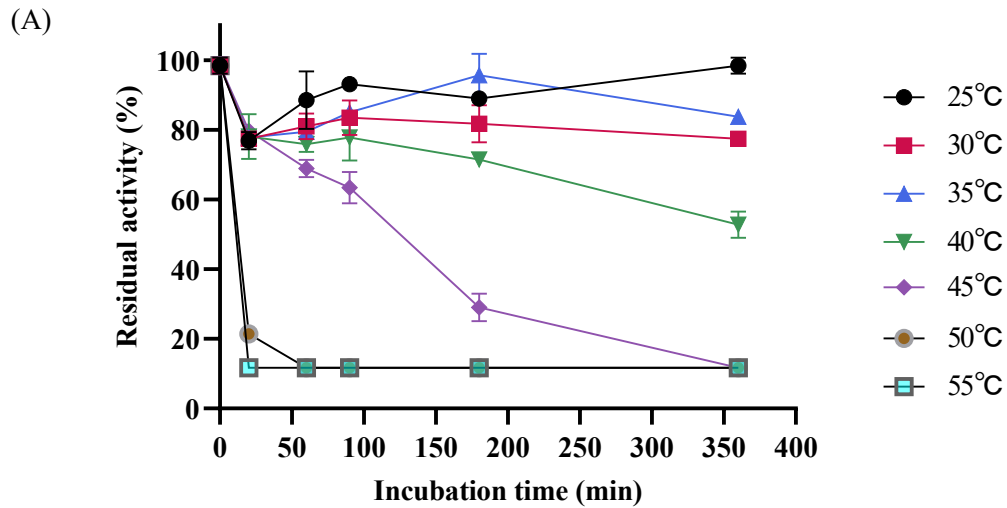

48  
 49  
 50

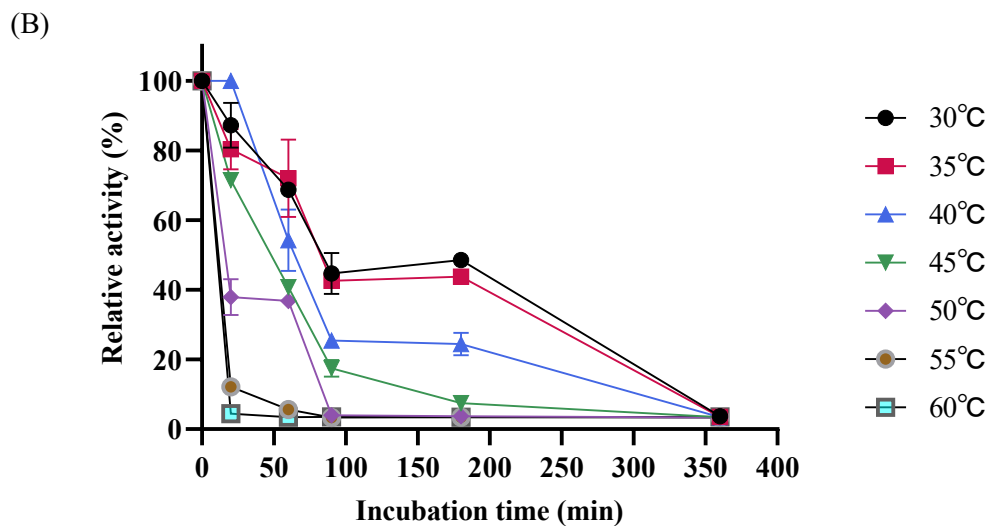

51

52 **Figure S3.** Temperature stability of different ADOs. (A) *Lsp*ADO, (B) *Cpu*ADO. Conditions:  $c(LspADO) = 10 \mu M$ ,  
 53  $c(CpuADO) = 2 \mu M$ ,  $c(4\text{-vinylguaiacol}) = 10 \text{ mM}$  (for *Lsp*ADO) and  $5 \text{ mM}$  (for *Cpu*ADO),  $t = 20 \text{ min}$  (10 min for  
 54 *Cpu*ADO). Error bars represent the standard deviation of three independent experiments.

55  
 56  
 57

58

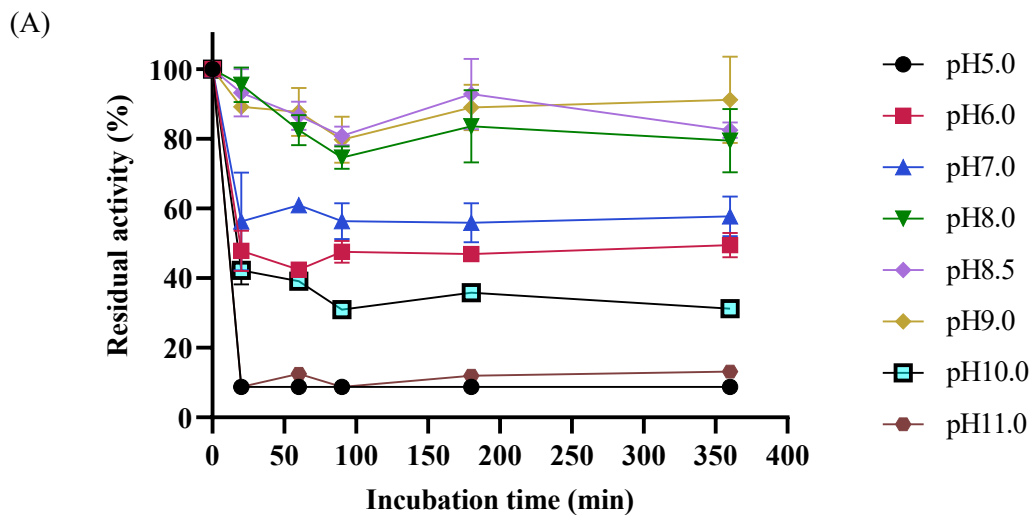

59

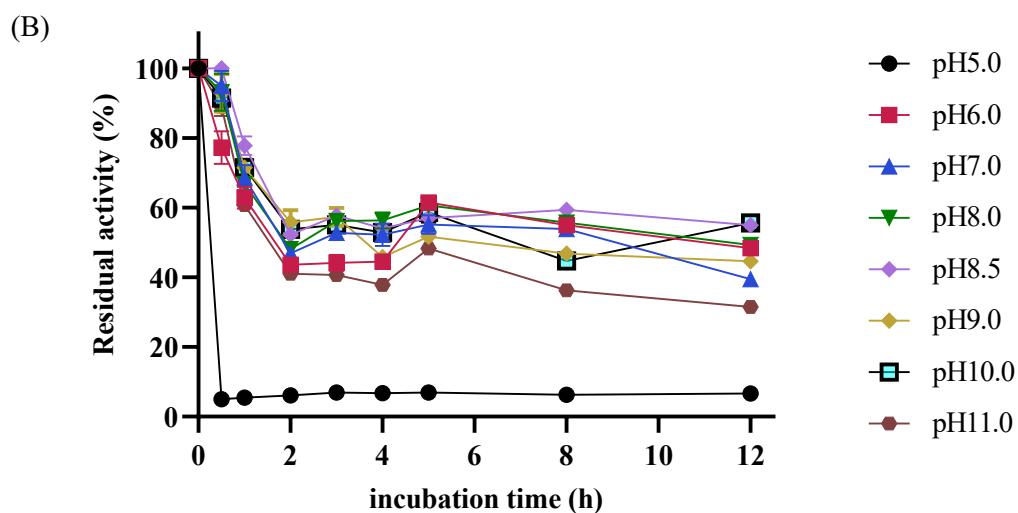

60

61 **Figure S4.** pH stability of different ADOs. (A) *LspADO*, (B) *CpuADO*. Conditions:  $c(LspADO) = 10 \mu M$ ,  
62  $c(CpuADO) = 2 \mu M$ ,  $c(4\text{-vinylguaiacol}) = 10 \text{ mM}$  (for *LspADO*) and  $5 \text{ mM}$  (for *CpuADO*),  $t = 20 \text{ min}$  ( $10 \text{ min}$  for  
63 *CpuADO*). Error bars represent the standard deviation of three independent experiments.

64

65

66

67

68

69

70

71

72

73

(A)

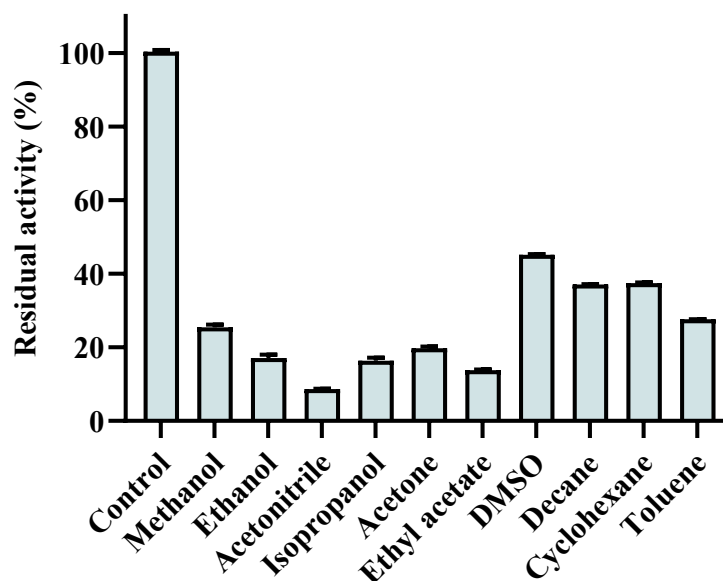

74

75

(B)

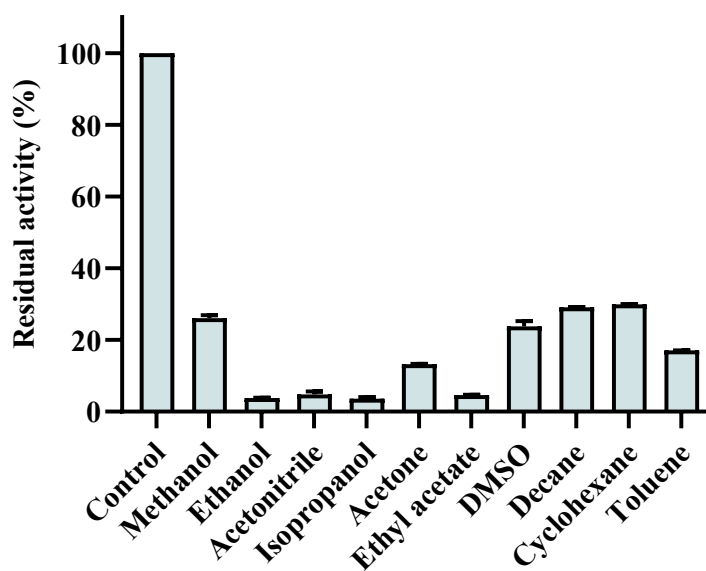

76

77 **Figure S5.** Influence of various hydrophilic and several hydrophobic solvents (30% v/v) on the activity of *LspADO*  
78 (A) and *CpuADO* (B). Conditions:  $c(LspADO) = 10 \mu\text{M}$ ,  $c(CpuADO) = 2 \mu\text{M}$ ,  $c(4\text{-vinylguaiacol}) = 10 \text{ mM}$  (for  
79 *LspADO*) and  $5 \text{ mM}$  (for *CpuADO*),  $t = 20 \text{ min}$  (10 min for *CpuADO*). Error bars represent the standard deviation of  
80 three independent experiments.

81

82

(A)

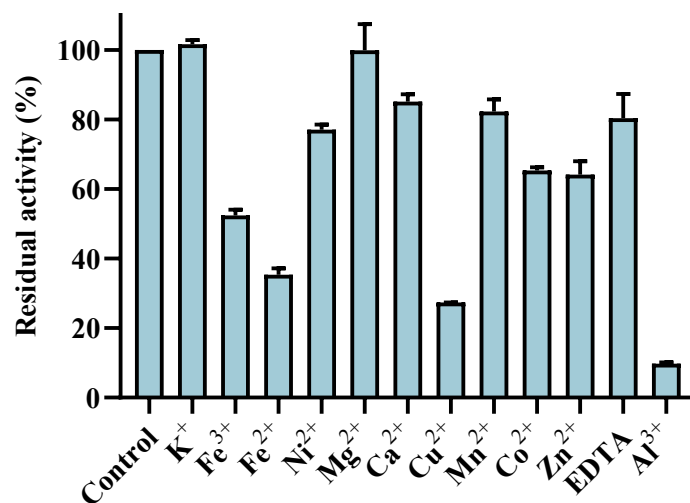

83

84

(B)

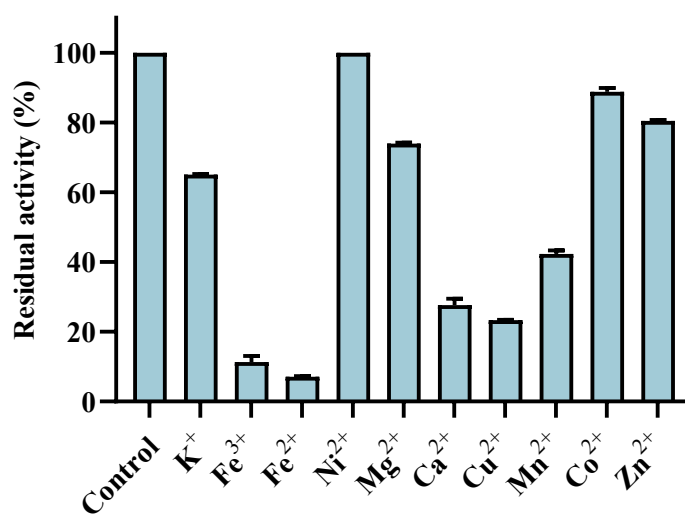

85

86 **Figure S6.** Effect of different metal ions (10 mM) on enzyme activity of *LspADO* (A), *CpuADO* (B). Conditions:

87  $c(LspADO) = 10 \mu\text{M}$ ,  $c(CpuADO) = 2 \mu\text{M}$ ,  $c(4\text{-vinylguaiacol}) = 10 \text{ mM}$  (for *LspADO*) and  $5 \text{ mM}$  (for *CpuADO*),  $t$

88  $= 20 \text{ min}$  (10 min for *CpuADO*).

89

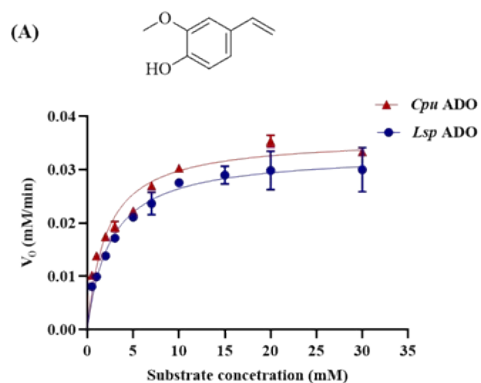

(B)

Table. Kinetic parameters of ADOs towards 4-vinylguaiacol

| Enzyme         | $k_{cat}$ [ $s^{-1}$ ] | $K_M$ [mM]      | $k_{cat}/K_M$ [ $mM^{-1} s^{-1}$ ] |
|----------------|------------------------|-----------------|------------------------------------|
| <i>Lsp</i> ADO | $0.30 \pm 0.001$       | $3.31 \pm 0.33$ | $0.09 \pm 0.009$                   |
| <i>Cpu</i> ADO | $0.22 \pm 0.009$       | $0.84 \pm 0.15$ | $0.26 \pm 0.003$                   |

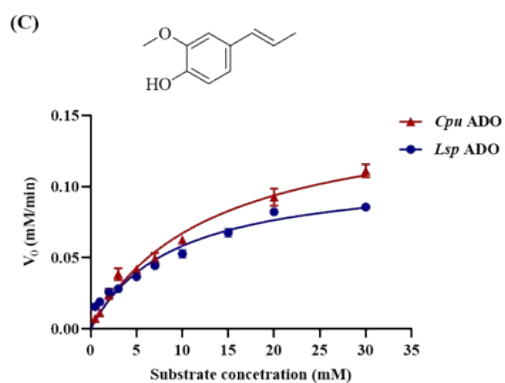

(D)

Table. Kinetic parameters of ADOs towards isoeugenol

| Enzyme         | $k_{cat}$ [ $s^{-1}$ ] | $K_M$ [mM]       | $k_{cat}/K_M$ [ $mM^{-1} s^{-1}$ ] |
|----------------|------------------------|------------------|------------------------------------|
| <i>Lsp</i> ADO | $0.92 \pm 0.03$        | $8.55 \pm 1.24$  | $0.11 \pm 0.01$                    |
| <i>Cpu</i> ADO | $1.29 \pm 0.14$        | $13.09 \pm 0.31$ | $0.10 \pm 0.03$                    |

90

91 **Figure S7.** Kinetic curves and parameters of the newly identified ADOs towards 4-vinylguaiacol (A and B) and  
 92 isoeugenol (C and D) respectively. (Reaction conditions: initial reaction rates were measured at 40°C in 50 mM  
 93 phosphate buffer (pH 8.0); the enzyme concentration was 2  $\mu$ M, the substrate concentrations were varied between 0.5  
 94 mM and 30 mM).

95

96

97  
98

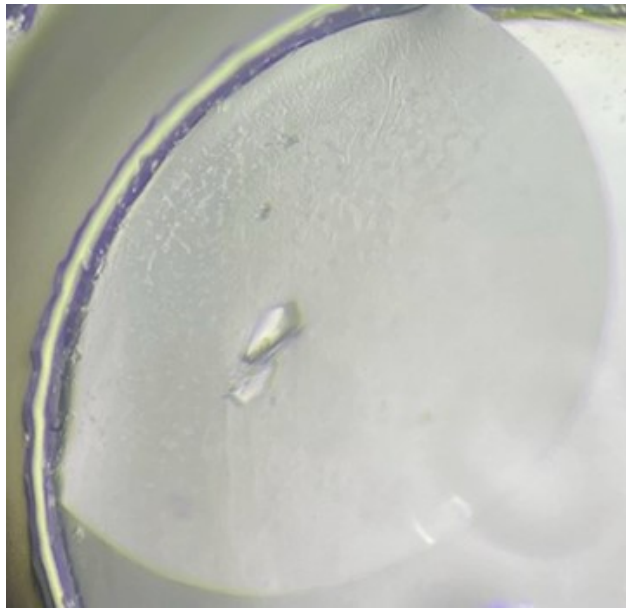

99

100 **Figure S8.** Morphology of *CpuADO* protein crystal. (Crystal growth conditions: 0.2M Ammonium sulfate, 0.1M BIS-  
101 Tris (pH6.5), 25% w/v Polyethylene glycol 3350)

102

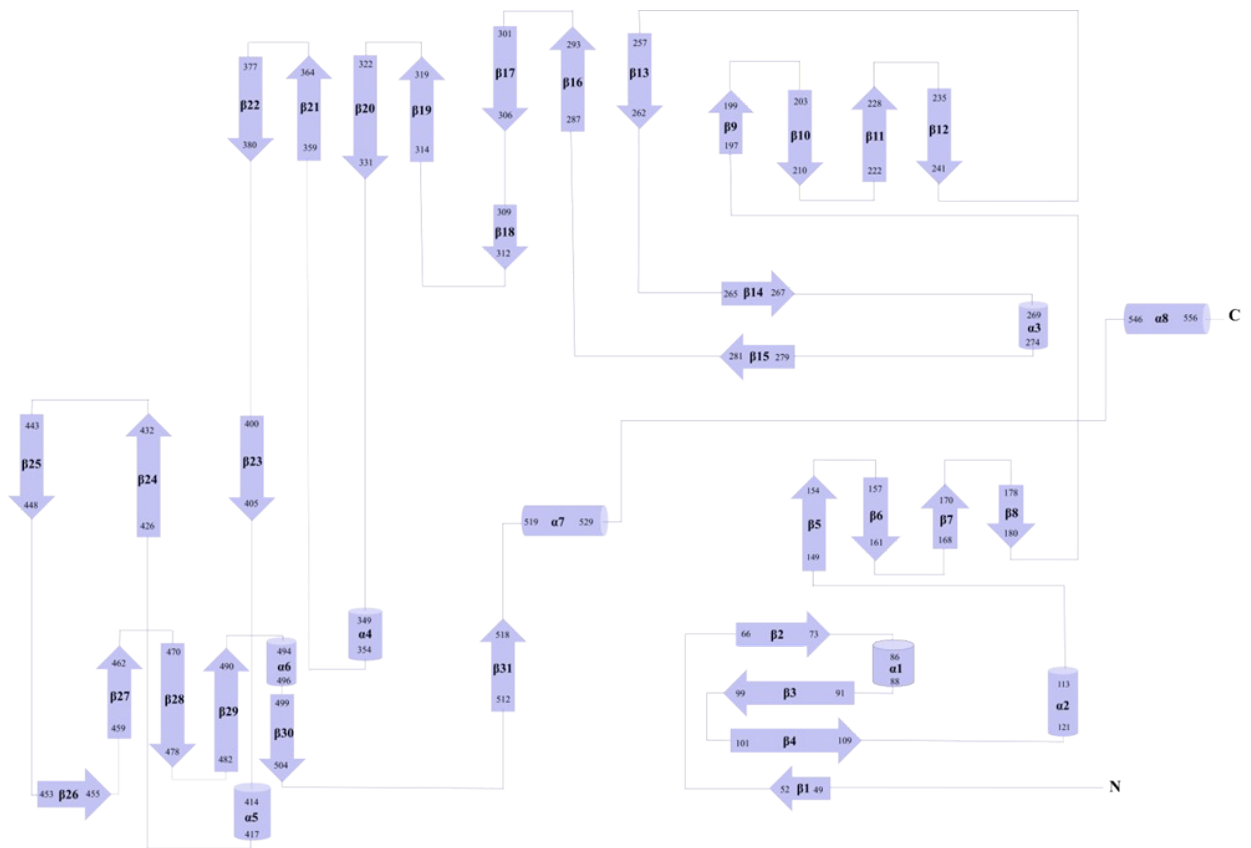

103

104 **Figure S9.** Secondary structure topology diagram of *Cpu*ADO (PDB ID 9LP3), with  $\beta$ -strands and  $\alpha$ -helices arranged  
105 according to their spatial organization in the crystal structure.

106

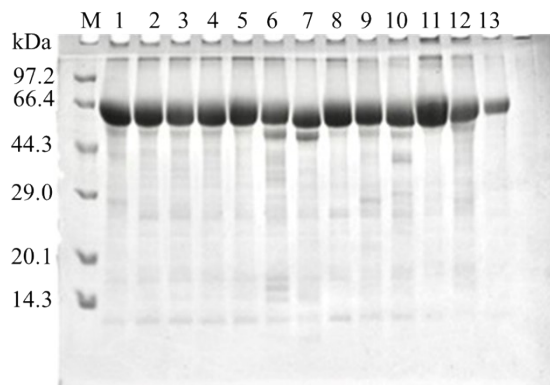

107

108 **Figure S10.** SDS-PAGE analysis of purified alanine mutants. Lane M: protein marker, lane 1: F87A, lane 2: Y129A,  
109 lane 3: T149A, lane 4: K162A, lane 5: E163A, lane 6: H195A, lane 7: H249A, lane 8: H312A, lane 9: F336A, lane  
110 10: E385A, lane 11: F386A, lane 12: E457A, lane 13: H513A.

111

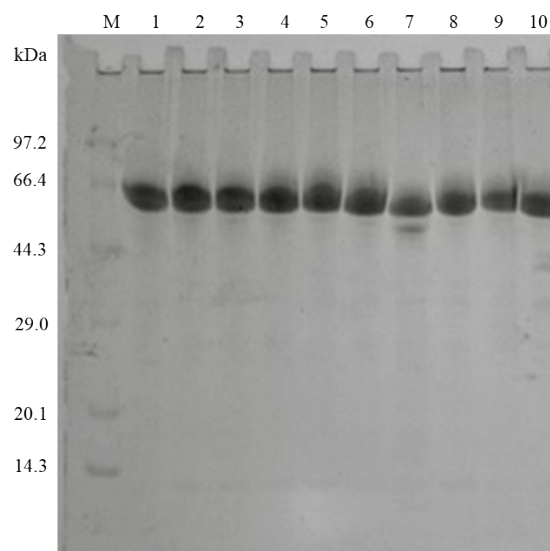

112

113 **Figure S11.** SDS-PAGE analysis of purified structure-guided rationally designed *Cpu*ADO mutants. Lane M: protein  
114 marker, lane 1: *Cpu* WT, lane 2: M247R, lane 3: F349V, lane 4: F349L, lane 5: N42A, lane 6: R352K, lane 7: F349W,  
115 lane 8: W338F, lane 9: W338D, lane 10: F349V-W338D.

116

117

118

119

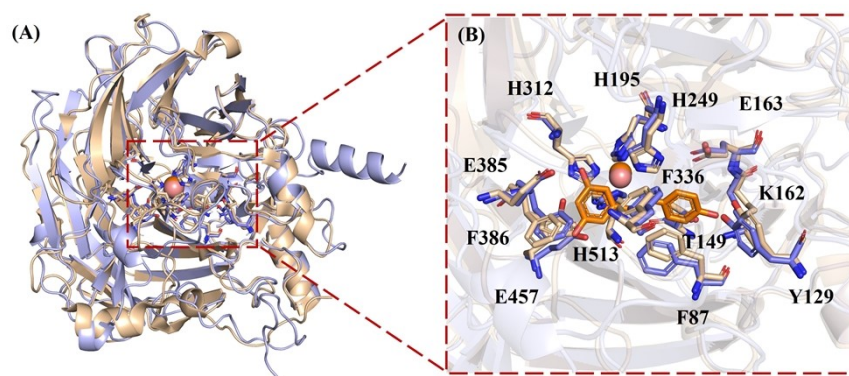

120

121 **Figure S12.** (A) Overall structural alignment of *CpuADO* with CAO1 (PDB ID: 5U90); (B) Close-up view of the  
 122 aligned active site residues. The orange sticks represent the CAO1-bound substrate resveratrol.

123

124

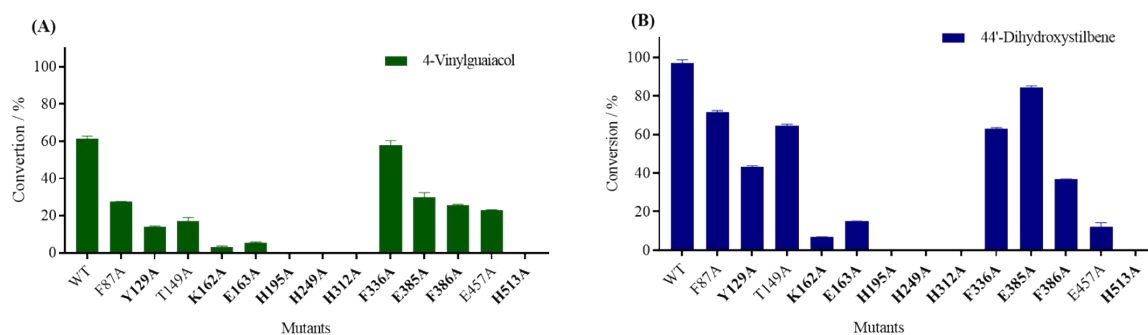

125

126 **Figure S13.** Catalytic Conversion Rates of *CpuADO* Alanine Mutants toward 4-vinylguaiacol (A) and 4,4'-  
 127 Dihydroxystilbene (B)

128

129

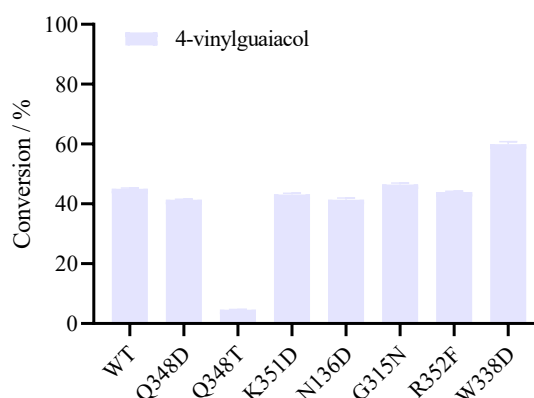

130

131 **Figure S14.** Preliminary screening of *CpuADO* variants selected from AI-based zero-shot activity scoring, showing  
 132 conversion rates toward 4-vinylguaiacol measured using crude enzyme. The top 10 substitutions predicted by the  
 133 Saprot 650M model are listed in Table S8. Among them, seven variants were successfully expressed and screened  
 134 experimentally, whereas three failed to express and are therefore not shown. W338D showed the largest improvement  
 135 in conversion and was subsequently selected for purification and detailed characterization.

136

137

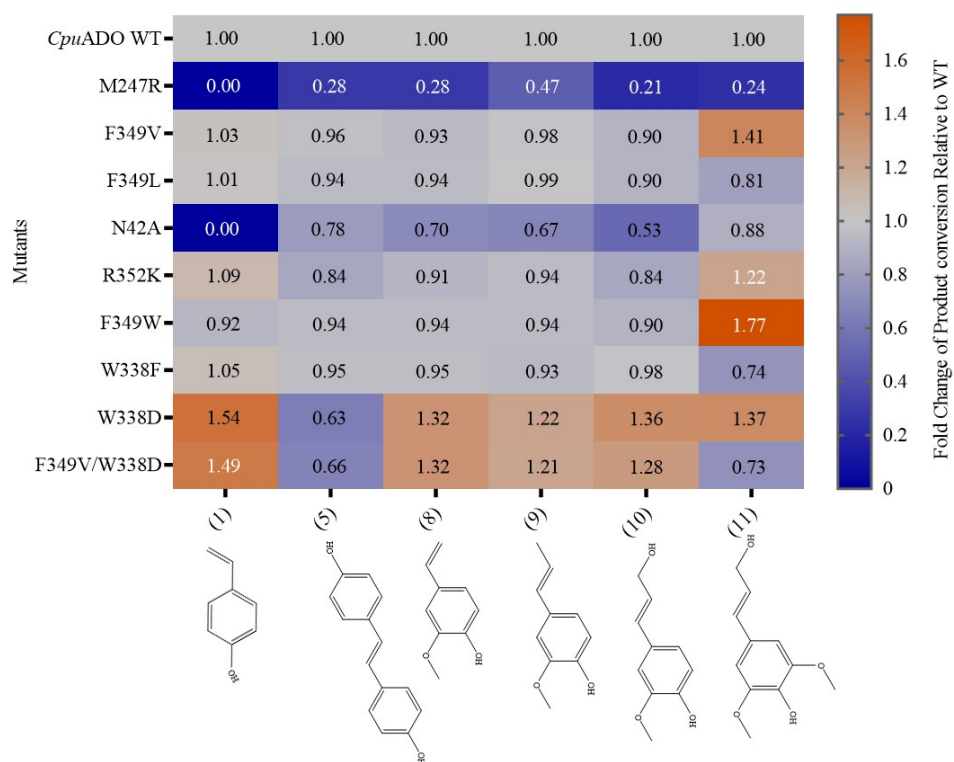

138

139 **Figure S15.** Heatmap of relative product conversion of *CpuADO* mutants compared to WT (set as 1.00) for six

140 Lignin-related substrates. Warmer colors indicate increased activity, cooler colors indicate decreased activity.

141

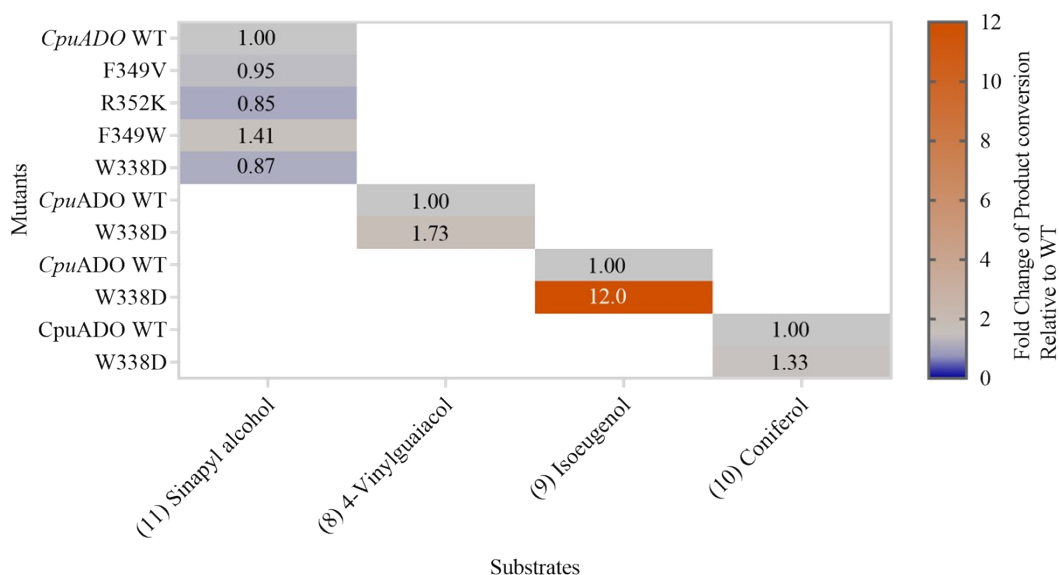

142

143 **Figure S16.** Heatmap of relative catalytic efficiencies ( $k_{cat}/K_M$ ) of *CpuADO* wild-type and mutants toward four

144 Lignin-related substrates (8, 9, 10, and 11), normalised to the corresponding WT values (set as 1.00). Warmer colors

145 indicate increased catalytic efficiency, whereas cooler colors indicate decreased catalytic efficiency.

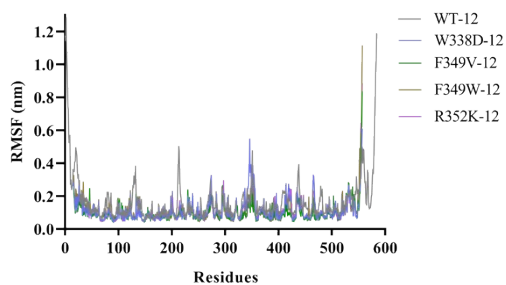

146

147 **Figure S17.** Per-residue backbone RMSF profiles for *Cpu*ADO WT and mutants bound to sinapyl alcohol (**11**). RMSF  
 148 values for C $\alpha$  atoms were calculated from 100 ns MD simulations after alignment on backbone heavy atoms (The  
 149 overall similarity of the profiles indicates that the mutations do not markedly alter local flexibility).

150

151

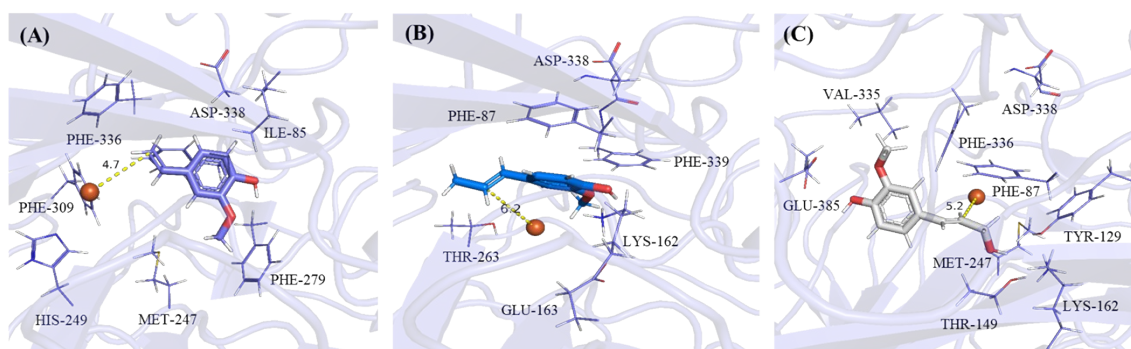

152

153 **Figure S18.** Final Frame Snapshots of W338D Mutants after 100 ns of MD Simulation: W338D-8 (A), W338D-9 (B),  
 154 and W338D-10 (C).

155

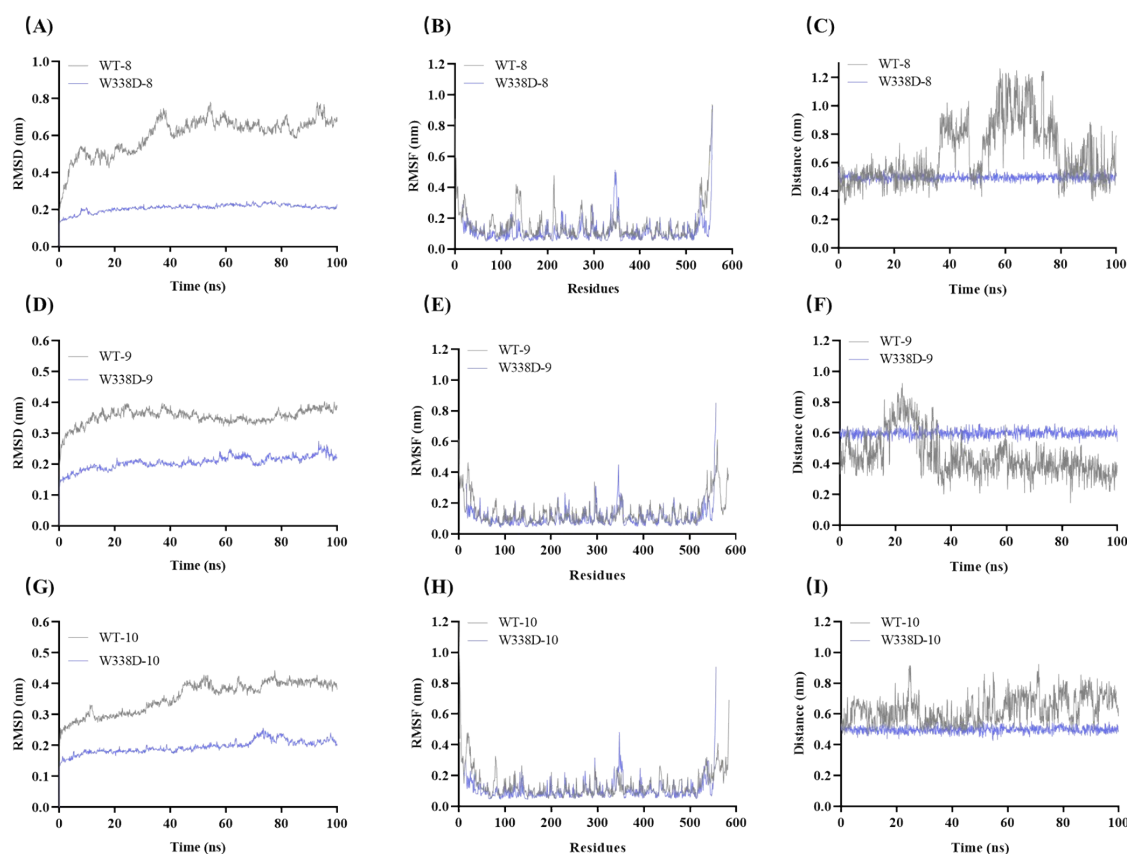

156

157 **Figure S19.** Molecular Dynamics Profiles of *CpuADO* Mutants W338D with three different Lignin-related substrates:  
 158 W338D-8 (4-Vinylguaiacol) (A-C), W338D-9 (Isoeugenol) (D-F), and W338D-10 (Coniferol) (G-I). Root-mean-  
 159 square deviation (RMSD) profiles of the enzyme backbone over 100ns (A, D, G). Root-mean-square fluctuation  
 160 (RMSF) of each residue (B, E, H). Time evolution of the distance between  $\text{Fe}^{2+}$  -C=C bond of the bound substrate (C,  
 161 F, I).

162

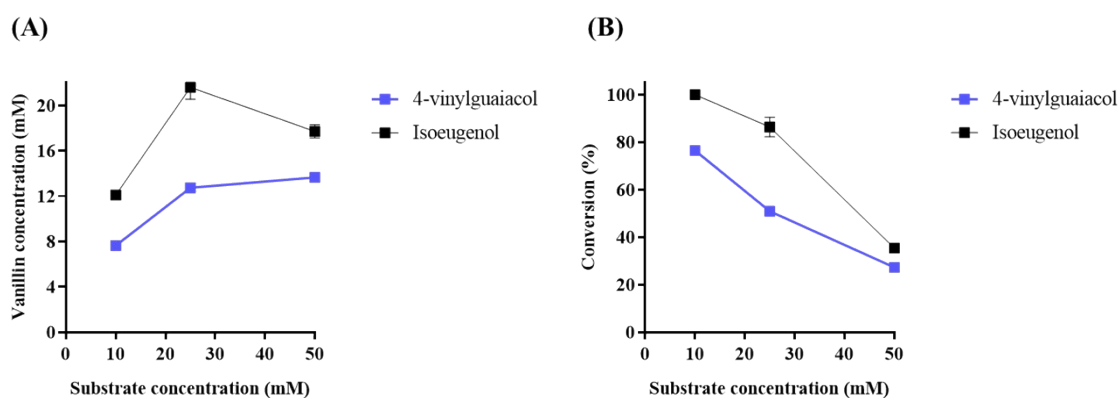

163

164 **Figure S20.** Effect of increased substrate loading on vanillin formation and conversion from 4-vinylguaiacol (**8**) and  
 165 isoeugenol (**9**) by *CpuADO* W338D.

166 (A) Final vanillin concentrations obtained at substrate concentration of 10, 25, and 50 mM.

167 (B) Corresponding conversion under the same conditions. Reactions were performed in a 1 mL system with 5% (v/v)  
 168 DMSO.

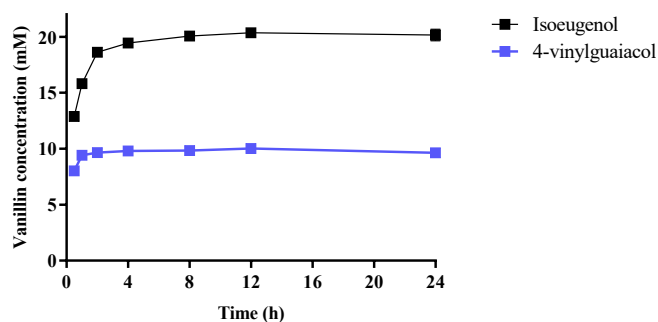

169

170 **Figure S21.** Time-course analysis of vanillin formation from 4-vinylguaiacol (**8**) and isoeugenol (**9**) in 50 mL-scale  
 171 reactions catalyzed by *Cpu*ADO W338D. Aliquots were withdrawn at 0.5, 1, 2, 4, 8, 12 and 24 h for GC analysis.  
 172 Reactions were performed at a substrate concentration of 25 mM with 5% (v/v) DMSO.

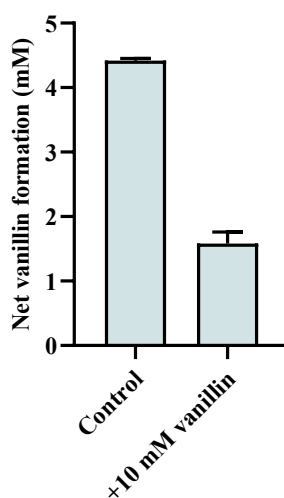

173

174 **Figure S22.** Effect of 2 h pre-incubation with 10 mM vanillin on the subsequent activity of *Cpu*ADO toward 4-  
 175 vinylguaiacol (**8**). Net vanillin formation after 30min was compared between the control and vanillin-treated groups.  
 176 Net vanillin formation was calculated as the difference between product concentrations at 30 min and 0 min.  
 177

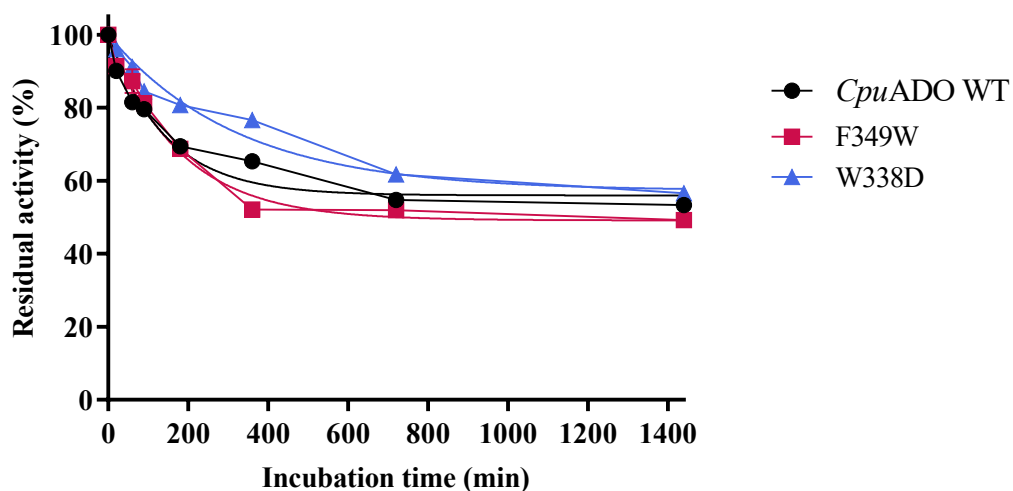

178

179 **Figure S23.** Thermal stability of *Cpu*ADO WT and selected beneficial mutants at 40 °C under the sinapyl alcohol  
 180 assay conditions. The corresponding fitted apparent half-lives are summarised in Table S10.

181 **2. Supporting Tables:****Table S1.** Primers used in alanine mutagenesis and structure-guided, rationally designed mutants of *CpuADO*.

| Mutants | Forward and reverse primers                                          |
|---------|----------------------------------------------------------------------|
| F87A    | CATTCACGCAAACGGCGATGGTAGCGTG<br>CCGTTTGCGTGAATGTCATCTTCAAACATCGGC    |
| Y129A   | CGGCCGTGCACGTAACCCGTGGACCGATAACG<br>TTACGTGCACGGCCGAACAGGCTACG       |
| T149A   | GTCTAACGCAAACGTGTTCTTCTGGCGTGG<br>GTCTAACGCAAACGTGTTCTTCTGGCGTGG     |
| E163A   | GACCAAAGCAGATGGTCCGCCGTACGCG<br>CCATCTGCTTTGGTTCGCCAGCAGCATGC        |
| H195A   | CACCGCGGCACCGAAATTCGATCCGCGCAC<br>TTCGGTGCCGCGGTGAAGGTCGGGCTC        |
| H249A   | CATGATTGCAGATTGCGGTCTGTCTGAAACTGG<br>CAATCTGCAATCATGCCCGCGAACGG      |
| H312A   | TCACGGTGCAGTGGCGGGCTGCTACGAAAACG<br>GCCACTGCACCGTGAAACGCGTTTTTCGC    |
| F336A   | TAACGTTGCATTCTGGTTTCCGCCGGAC<br>CAGAATGCAACGTTACCATCTGCCACGG         |
| E385A   | CAACGGTGCATTTAGCCGTATCGATGATCGTTGG<br>CTAAATGCACCGTTGGTCGGCCAAAC     |
| F386A   | CATGATTGCAGATTGCGGTCTGTCTGAAACTGG<br>CAATCTGCAATCATGCCCGCGAACGG      |
| E457A   | CTTCCAGGCACCGACCTTCATCCCGAAAG<br>GTCGGTGCCTGGAAGGTGCAGGTCGG          |
| H513A   | GGGTCTGGCAGGCAACTGGGTGGACTGG<br>TTGCCTGCCAGACCCAGTTTCAGTTTCAGCG      |
| M247R   | CGCGGGCCGTATTCATGATTGCGGTCTGTCTG<br>TGAATACGGCCCGCGAACGGAGCTTC       |
| F349V   | GGGTCAGGTTGCAAACGTAACAAACTGTCCTCCC<br>TTTGCAACCTGACCCTGTTCTTCACCGTCC |
| F349L   | GGGTCAGCTGGCAAACGTAACAAACTGTCCTCCC<br>TTTGCCAGCTGACCCTGTTCTTCACCGTCC |
| N42A    | GAGCATGGCAAACCGTCCCGTTTCGAAGG<br>GGTTTTGCCATGCTCGCGAAAACCGG          |
| R352K   | CGCAAAAAAAAAACAACTGTCCTCCCCGACC<br>TTGTTTTTTTTTGCGAACTGACCCTGTTC     |
| F349W   | GGGTCAGTGGGCAAACGTAACAAACTGTCCTCCC<br>TTTGCCCACTGACCCTGTTCTTCACCGTCC |
| W338D   | TTTCTTCGATTTTCCGCCGGACGGTGAAG<br>GGAAAATCGAAGAAAACGTTACCATCTGCCACG   |

182 W338F TTTCTTCTTTTTCCGCCGGACGGTGAAG  
 183 GGAAAAAAGAAGAAAACGTTACCATCTGCCACG  
 184 F349V-W338D TTTCTTCGATTTTCCGCCGGACGGTGAAG  
 185 GGAAATCGAAGAAAACGTTACCATCTGCCACG  
 186 F349V-R368K GTTGCAAAAAAAAAACAACTGTCCTCCCCGACC  
 187 GTTGTTTTTTTTTTGC AACCTGACCCTGTTC

**Table S2.** Primers used for Site-Directed Mutagenesis of *Tth*ADO Based on Structure-Guided Mutations Identified in *Cpu*ADO.

| Enzyme         | Mutants | Forward and reverse primers                                         |
|----------------|---------|---------------------------------------------------------------------|
| <i>Tth</i> ADO | F335D   | TTTCTTCGATTTCCGCCGGACGACAACATCACC<br>GGGAAATCGAAGAAAACGTTACCGTCCGCC |
| <i>Tth</i> ADO | R352K   | TGCGAAAAAAAAACCGTCTGAGCTCCCCG<br>CGTTTTTTTTTCGCAACACCGTCTGCC        |

190  
191  
192

**Table S3.** List of amino acid sequences of different ADOs

| Enzyme name    | amino acid sequence                                                                                                                                                                                                                                                                                                                                                                                                                                                                                                                                                                                                                                                 |
|----------------|---------------------------------------------------------------------------------------------------------------------------------------------------------------------------------------------------------------------------------------------------------------------------------------------------------------------------------------------------------------------------------------------------------------------------------------------------------------------------------------------------------------------------------------------------------------------------------------------------------------------------------------------------------------------|
| <i>Tth</i> ADO | MAHIHDLAPEVSNYSSGRLTPPTPVRFPRTPVFASMNKPCRFEGDVFDLEVS<br>GAIPPDIDGTFFRVQPDHRFPPLFEDDIHFNGDGSVTAIRISGGHADLRQRYV<br>RTERYLLETRARRSLFGRYRNPWTDNESVRGVIRTASNTNVVFWRGALLA<br>MKEDGPPFAMDPVTLETLGRYDFEGQILSPTFTAHPKIDPDTGEMVCFAYE<br>AGGDGSDCSVDVAVWTVDADGKKVEECWYKAPFAGMIHDCGITKNWVV<br>LPLTPIKMDLERMKRGGNKFAWDPSDQWYGVPVRRGAKSDDIIFRAD<br>NGFHGHVAGCYELPSGEIVFDLTVADGNVFFFPPDDNITPPADGVAKRNR<br>LSSPTVRWIFDPKAKKSAIRTEAAGDADIWVADERVKPALTWPTNGEFSRI<br>DDRYVTKPYRHFQAVVDPTRPYDFEKCGPPAGGLFNCLGHYTWSDQNY<br>HHGHNTGDPSGDGRSNGSAEEATAGKFGLQDVYFAGPTMTFQEPTFIPRQ<br>GAAEGEGYLIALLNHLDELNRNDVVIFEARNLGKGPLAVIHLPLKLLGLHG<br>NWVDSREIEAWRRRRAENGDVGPLRVAKEPLPWQKKFAAAAQNGSNGV |
| <i>Lsp</i> ADO | MNAFPPLPIYTGFNTPLRMEVDIHDLEVEGQVPEGLDGIFYRVGPDQPYP<br>LGNDIYFNGDGMVSAFRFEKGRVDLKCARYARTDKFLLERDARKALFGAYR<br>NPFDDPAVEGRIRGANTNVVYHAGKLLALKEDSPPLVMDPWTLETRGYY<br>DYEGVLTSETFTAHPKLDPHGTGEMIAFGYSAKGIASPDVAYYVIDRDGKIV<br>HEVWFQMPYPCLVHDFGVTRDYVVFIVPVISSLDFAFRAGRPTFGWDASK<br>DVYLGVLPRRGS AKDLRWFRTSNLFAHVMNAFNDGTKIHFDTPVAKGN<br>MFPFFPDVTGAPFDPVAATAHVTRWSVDYAGGEGIGFEQLTTLAGEFPRID                                                                                                                                                                                                                                                                            |

---

DRYAMEAYRHGYICVSDRSRPYDEKRAGSITGMFINCLGHIDHATGSSDDV  
YVVGPVSSLQEPAFIPASKDAPEGEGYLVALANRYDEQRSDLLVLDAQRLQ  
EGPIATIKLPLKLRNGLHGNWVPVEDLPPRPAGA

*Cpu* ADO

MAHIFDLAPEVSLPDEPIYKDGKLRPNHVQFPQTPVFASMNKPSRFEGTIL  
SLEHTGIIPPEINGTFFRVQPDHRFPMPFEDDIHFNGDGSVTAIRIFDGKVDFR  
QRYVHTERYKAETKARRSLFGRYRNPWTDNESVKG VIRTASNTNVFFWRG  
MLLATKEDGPPYAMDPVTLETYGRYDFEGQILSPTFTAHPKFDPRGTGEMVC  
FAYETGGDGADCSREVMVWTLDKDGKKVSEWFEAPFAGMIHDCGLSEN  
WLVLP LTPIKMDLERMKRGGNKFAWDPKEDQVYGLVPRRGDGEVKWFR  
GENAFHGHVAGCYENAQGHVVIDLTVADGNVFFWFPDGEEQGQFAKRN  
KLSSPTHR WILDPSPNNARITPALVWPTNGEFSRIDDRWTTTKYKHFVLA  
KVDPSRPYDFAKCGPPAGGLFNCLGHYTWDLDELATGQEDVYFAGPTCT  
FQEPTFIPKGDKEGEGWLIALVNHL DVL RNDV VILDAQN LAKGPVCTIHL P  
LKLKLG L HGNWVDWRDIEDWTKRRQEDGEVGPVQVATEMLPWQKAFWE  
KEKEKNGNGVEGPNINGTNGANGTNGVNGSSH

*Dsp* ADO

MAHIFSLAPAVKGYKDGRLTRPGEATTFPQTPVFSGINKPSRLEGDVFDLEV  
TG TIPKEINATFYRIQPDQRFPP LFEDDVHFNGDGSVTAIRISNGHADFKQRY  
VQTDRYKAETAARQSLFGRYRNPFTDNESVKG VIRTASNTNITFRRGMLLA  
SKEDGPPFAMDPVTLET LGRYDFEGQITAPTFTAHPKFDPETGEMICFAYEA  
GGNGNDGSLDIIMWTIDADGKKTEEAFYKAPFAGMIHDIGVSKNYVVMPL  
TPIKVNMDRMKRGGEKFAWDPYEDQWYGLVPRRNGKSSDIIFRADNAF  
QGHIAGCYENEDGHVVVDLTVADGNVFFWPPDEELTPIQPKVTARDKL  
NSQTTRWILDPKAKTGTRIKPAFVWDINGEFSRIDDRWVTKKYKHFVQARI  
DPTKPYDFQKCGPPAGGLFNLSLGHYTWDSENPLAHGEDTYFFGPTSTVQ  
EPSFIPRGEDAAEGEGYLIALVNRLGELRNDVAIFDAQNLAQGPLAVLHLPL  
ALKLGLHGNFVDHRDIEAWQRRRDAGGDVGPVKIATEPLPWQKELANGA  
NGSH

*Slo* ADO

MDESSRLEGDVFDLEVTGTL PADINGTFFRVQPDHRFPPLYEDDIHFNGDGS  
VTAIRIADGHADFKQRYVRTERYQAETRARKSLFGRYRNPWTDNESILSPT  
FTAHPKVDPETGEMVCFAYEAGGDGADCSVDVAVWTV DADGKKIEECW  
YKAPFAGMIHDCGISENYVVLALTPIKMDFERMKRGGNKFAWDPNEDQW  
YGVVPRRGAKSEDIIIFRADNGFHGHVAGCYELPSGEIVFDLTVADGNVFF  
FFPPDDNITPPDGVAKRNLSSPTVRWIFDPKAKKSAIRTPAAGDADVWVA  
DERSKPVVTWLTNGEFSRIDDRVTTKPYRHFVQAVVDPTRPYDFDKCGPP  
AGGLFNCLGHYTWSEEHFHTDKPAQNGTNGKSGEKGFGLEDMYFFGPT  
MTFQEPTFIPREGGAEGEGYLIALLNHL DQLRNDV VIFDAQN LAKGPLATV  
HLPLK L KLG L HGNWVDNRDIEAWQRRRG TNGDVG PVQVATEPLPWQKKL  
AEQNGTGA

---

195 **Table S4.** Comparative kinetic parameters of representative reported ADO/ADO-like enzymes on the common substrates 4-vinylguaiacol (substrate **8**) and isoeugenol (substrate **9**),  
 196 including *Cpu*ADO WT and selected mutants from this study.

| <b>4-Vinylguaiacol (substrate 8)</b> |                                       |                              |              |                                                   |                                                         |                                                                                              |                       |
|--------------------------------------|---------------------------------------|------------------------------|--------------|---------------------------------------------------|---------------------------------------------------------|----------------------------------------------------------------------------------------------|-----------------------|
| Enzyme/variant                       | Source                                | $k_{cat}$ [s <sup>-1</sup> ] | $K_M$ [mM]   | $k_{cat}/K_M$ [mM <sup>-1</sup> s <sup>-1</sup> ] | Assay format                                            | Conditions                                                                                   | Reference             |
| <i>Cpu</i> ADO WT                    | <i>Coniochaeta pulveracea</i>         | 0.22 ± 0.01                  | 0.84 ± 0.15  | 0.26 ± 0.01                                       | Initial-rate                                            | 50 mM phosphate buffer, pH 8.0, 40 °C, 2µM enzyme, 0.05-30mM substrate                       | This work (Figure S7) |
| <i>Cpu</i> ADO W338D                 | <i>Coniochaeta pulveracea</i>         | 2.22 ± 0.10                  | 4.94 ± 0.68  | 0.45 ± 0.06                                       | Initial-rate                                            | 50 mM phosphate buffer, pH 8.0, 40 °C, 2µM enzyme, 0.05-30mM substrate                       | This work (Table 2)   |
| <i>Cso2</i>                          | <i>Caulobacter segnis</i> ATCC 21756  | NR                           | 4.1          | NR                                                | HPLC-based steady-state kinetic assay (Lineweaver-Burk) | 50 mM potassium phosphate buffer, pH 7.5, 0.2-1mg/mL enzyme, 0.5-2 mM substrate <sup>1</sup> | 25                    |
| <i>Tth</i> ADO                       | <i>Thermothelomyces thermophila</i>   | 3.3±0.40                     | 2.73±0.14    | 1.21±0.16                                         | Initial-rate                                            | 50 mM potassium phosphate buffer, pH 7.5, 1.3mg/mL enzyme, 0.5-7 mM substrate                | 18                    |
| <i>Tt</i> CCO (ADO)                  | <i>Thermothelomyces thermophilus</i>  | 0.45                         | 1.42 ± 0.08  | 0.32                                              | Initial-rate                                            | 100 mM PBS, pH 7.0, 0-2 mM substrate                                                         | 24                    |
| <i>Tt</i> CCO (M3)                   | <i>Thermothelomyces thermophilus</i>  | 0.91                         | 0.42 ± 0.035 | 2.14                                              | Initial-rate                                            | 100 mM PBS, pH 7.0, 0-2 mM substrate                                                         | 24                    |
| <i>Map</i> ADO                       | <i>Moesziomyces aphidis</i> DSM 70725 | 361± 12                      | 0.22± 0.05   | 1640.91±347.17                                    | Endpoint measurement on HPLC                            | 10 mM potassium phosphate buffer, pH 7.4, 0.02-6 mM substrate                                | 27                    |

197

198

199

Table S4. (continued).

| <b>Isoeugenol (substrate 9)</b> |                                       |                              |              |                                                   |                                                         |                                                                                       |                       |
|---------------------------------|---------------------------------------|------------------------------|--------------|---------------------------------------------------|---------------------------------------------------------|---------------------------------------------------------------------------------------|-----------------------|
| Enzyme/variant                  | Source                                | $k_{cat}$ [s <sup>-1</sup> ] | $K_M$ [mM]   | $k_{cat}/K_M$ [mM <sup>-1</sup> s <sup>-1</sup> ] | Assay format                                            | Conditions                                                                            | Reference             |
| <i>Cpu</i> ADO WT               | <i>Coniochaeta pulveracea</i>         | 1.29 ± 0.14                  | 13.09 ± 0.31 | 0.10 ± 0.03                                       | Initial-rate                                            | 50 mM phosphate buffer, pH 8.0, 40 °C, 2 μM enzyme, 0.05-30mM substrate               | This work (Figure S7) |
| <i>Cpu</i> ADO W338D            | <i>Coniochaeta pulveracea</i>         | 3.64 ± 0.27                  | 3.05 ± 0.73  | 1.20 ± 0.3                                        | Initial-rate                                            | 50 mM phosphate buffer, pH 8.0, 40 °C, 2 μM enzyme, 0.05-30mM substrate               | This work (Table 2)   |
| <i>Cso2</i>                     | <i>Caulobacter segnis</i> ATCC 217568 | NR                           | 0.85         | NR                                                | HPLC-based steady-state kinetic assay (Lineweaver-Burk) | 50 mM potassium phosphate buffer, pH 7.5, 20°C, 0.2-1mg/mL enzyme, 0.5-2 mM substrate | 25                    |
| <i>Tth</i> ADO                  | <i>Thermothelomyces thermophila</i>   | 5.28±0.08                    | 2.0±0.14     | 2.64±0.19                                         | Initial-rate                                            | 50 mM potassium phosphate buffer, pH 7.5, 1.3mg/mL enzyme, 0.5-7 mM substrate         | 18                    |
| <i>Tt</i> CCO (ADO)             | <i>Thermothelomyces thermophilus</i>  | 44                           | 2.24±0.26    | 19.64±2.32                                        | Initial-rate                                            | 100mM PBS buffer, pH 7.0, 30°C, 0-2 mM substrate                                      | 24                    |
| <i>Map</i> ADO                  | <i>Moesziomyces aphidis</i> DSM 70725 | 238                          | 0.12±0.01    | 2016.95±222.21                                    | Continuous initial-rate UV-Vis                          | 10 mM potassium phosphate buffer, pH 7.4, 0.05-2 mM substrate                         | 27                    |
| <i>Map</i> ADO                  | <i>Moesziomyces aphidis</i> DSM 70725 | 654 ± 2                      | 0.58 ± 0.10  | 1123.71±198.98                                    | Endpoint measurement on HPLC                            | 10 mM potassium phosphate buffer, pH 7.4, 0.02-6 mM substrate                         | 27                    |

201

202

203

204

205

206

207 a Values are reported as given in the original references unless otherwise indicated.

208 b  $k_{\text{cat}}/K_m$  values were recalculated where necessary and are uniformly expressed in  $\text{mM}^{-1} \text{s}^{-1}$  for direct comparison.

209 c Direct comparison across studies should be interpreted with caution because detection methods, enzyme preparation, and reaction conditions differ between reports.

210 d Substrate numbering follows the main manuscript scheme: substrate **8**=4-vinylguaiacol; substrate **9**=Isoeugenol.

211 NR, not reported.

212 **Table S5.** Retention times of different substrates and products

|    | Substrate Name                | Structure | Retention time (min) | Product Name          | Structure | Retention time (min) |
|----|-------------------------------|-----------|----------------------|-----------------------|-----------|----------------------|
| 1  | 4-Vinylphenol                 |           | 1.7                  | 4-hydroxybenzaldehyde |           | 2.542                |
| 2  | 4-Isopropenylphenol           |           | 2.139                | 4-Hydroxyacetophenone |           | 3.219                |
| 3  | p-Coumaryl alcohol            |           | 5.008                | p-Hydroxybenzaldehyde |           | 2.542                |
| 4  | trans-4-Hydroxystilbene       |           | 9.261                | p-Hydroxybenzaldehyde |           | 2.542                |
| 5  | 4,4'-Dihydroxystilbene        |           | 12.936               | p-Hydroxybenzaldehyde |           | 2.542                |
| 6  | 4-(3,5-Dimethoxystyryl)phenol |           | 15.504               | p-Hydroxybenzaldehyde |           | 2.542                |
| 7  | resveratrol                   |           | 16.923               | p-Hydroxybenzaldehyde |           | 2.542                |
| 8  | 4-vinylguaiacol               |           | 2.294                | vanillin              |           | 2.94                 |
| 9  | Isoeugenol                    |           | 3.349                | vanillin              |           | 2.94                 |
| 10 | Coniferol                     |           | 6.204                | vanillin              |           | 2.94                 |
| 11 | Sinapyl alcohol               |           | 8.702                | syringaldehyde        |           | 5.41                 |

|    |                  |  |       |                           |  |       |
|----|------------------|--|-------|---------------------------|--|-------|
| 12 | Piceatannol      |  | 19.12 | 3,5-Dihydroxybenzaldehyde |  | 5.068 |
| 13 | Oxyresveratrol   |  | 16.84 | 3,5-Dihydroxybenzaldehyde |  | 5.068 |
| 14 | Isorhapontigenin |  | 16.05 | vanillin                  |  | 2.94  |
| 15 | curcumin         |  | 16.7  | vanillin                  |  | 2.94  |
| 16 | 4-Vinylaniline   |  | 1.848 | 4-Aminobenzaldehyde       |  | 3.069 |

213

214

215 **Table S6.** Some substrates that did not produce any products are listed in this table.

| No. | Substrate | Retention time (min) | Product | No. | Substrate | Retention time (min) | Product |
|-----|-----------|----------------------|---------|-----|-----------|----------------------|---------|
| 17  |           | 1.068                | -       | 30  |           | 5.93                 | -       |
| 18  |           | 1.188                | -       | 31  |           | 9.152                | -       |
| 19  |           | 1.189                | -       | 32  |           | 10.325               | -       |
| 20  |           | 1.163                | -       | 33  |           | 1.035                | -       |
| 21  |           | 1.233                | -       | 34  |           | 1.159                | -       |
| 22  |           | 1.353                | -       | 35  |           | 1.33                 | -       |
| 23  |           | 1.34                 | -       | 36  |           | 1.615                | -       |
| 24  |           | 1.42                 | -       | 37  |           | 2.089                | -       |
| 25  |           | 1.525                | -       | 38  |           | 2.794                | -       |

|    |                                                                                   |       |   |    |                                                                                    |       |   |
|----|-----------------------------------------------------------------------------------|-------|---|----|------------------------------------------------------------------------------------|-------|---|
| 26 | 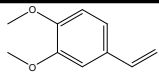 | 2.612 | - | 39 |  | 1.048 | - |
| 27 |  | 1.031 | - | 40 |  | 1.033 | - |
| 28 |  | 2.119 | - | 41 |  | 1.031 | - |
| 29 |  | 3.746 | - | 42 |  | 1.041 | - |

216 <sup>a</sup>Reaction conditions: 10  $\mu$ M enzyme, 10 mM substrate (dissolved using 1% DMSO), pH 8.0, 40 °C, 24h.

217 "-" represents no product generated.

218

219

220 **Table S7.** Crystallographic data collection and refinement statistics of *Cpu*ADO.

| <i>Cpu</i> ADO                        |                                     |
|---------------------------------------|-------------------------------------|
| <b>Data collection</b>                |                                     |
| Space group                           | P 21 21 21                          |
| <b>Cell dimensions</b>                |                                     |
| <i>a</i> , <i>b</i> , <i>c</i> (Å)    | 66.902, 90.052, 194.065             |
| $\alpha$ , $\beta$ , $\gamma$ (°)     | 90, 90, 90                          |
| Resolution (Å)                        | 48.52-2.20 (2.26-2.20) <sup>a</sup> |
| $R_{\text{merge}}$                    | 0.234 (0.524)                       |
| <i>I</i> / <i>s</i> ( <i>I</i> )      | 6.9 (4.0)                           |
| $CC_{1/2}$                            | 0.975 (0.908)                       |
| Completeness (%)                      | 100.0 (100.0)                       |
| Redundancy                            | 8.4 (8.5)                           |
| <b>Refinement</b>                     |                                     |
| Resolution (Å)                        | 45.03-2.20 (2.28-2.20)              |
| No. reflections                       | 60362                               |
| $R_{\text{work}} / R_{\text{free}}^b$ | 0.1942/0.2395                       |
| <b>No. atoms</b>                      |                                     |
| Protein                               | 8717                                |
| Ligand                                | 0                                   |
| Water                                 | 773                                 |
| Ion                                   | 4                                   |
| <b>B factors</b>                      |                                     |
| Protein                               | 34.42                               |
| Ligand                                | -                                   |
| Water                                 | 33.48                               |
| Ion                                   | 29.64                               |
| <b>R.m.s.deviations</b>               |                                     |
| Bond lengths (Å)                      | 0.007                               |
| Bond angles (°)                       | 0.92                                |

Ramachandran favored (%) 94.7

Ramachandran outliers (%) 0.0

221 <sup>a</sup>Values in parentheses are for the highest-resolution shell.

222

223 **Table S8.** Top 10 Mutations Predicted by Saprot 650M Zero-Shot Model for Activity Enhancement of *CpuADO*

| No. | Mutation | Score |
|-----|----------|-------|
| 1   | Q348D    | 6.52  |
| 2   | M224G    | 5.70  |
| 3   | Q348T    | 5.38  |
| 4   | K351D    | 5.03  |
| 5   | N136D    | 5.01  |
| 6   | G315N    | 4.89  |
| 7   | Q348S    | 4.59  |
| 8   | R352F    | 4.44  |
| 9   | F414E    | 4.36  |
| 10  | W338D    | 4.31  |

224

225

226 **Table S9.** Catalytic Conversion Rates of *ThADO* Mutants Carrying Structure-Guided Mutations Derived from  
227 *CpuADO*

| Substrates      | 4-Vinylphenol | 4,4'-<br>Dihydroxystilbene | 4-<br>vinylguaiacol | Isoeugenol | Coniferol  | Sinapyl<br>alcohol |
|-----------------|---------------|----------------------------|---------------------|------------|------------|--------------------|
| <i>ThADO</i> WT | 27.4±0.12     | 83.27±1.55                 | 35.74±0.28          | 62.07±0.79 | 11.23±0.23 | 2.68±0.03          |
| F335D           | 32.03±0.59    | 96.03±1.16                 | 40.19±1.25          | 70.76±0.54 | 15.74±0.1  | 4.42±0.01          |
| R352K           | 45.8±0.65     | 56.16±1.9                  | 49.29±1.65          | 94.69±0.84 | 16.92±0.31 | 3.44±0.06          |

228

229 **Table S10.** Fitted thermal-stability parameters of *CpuADO* WT, F349W, and W338D at 40 °C under the sinapyl  
230 alcohol assay conditions.

| Variant              | Plateau (%) | Apparent half-life (min) | Residual activity at 1440 min (%) |
|----------------------|-------------|--------------------------|-----------------------------------|
| <i>Cpu ADO</i><br>WT | 55.98       | 99.5                     | 53.3                              |
| F349W                | 49.13       | 124.0                    | 49.2                              |
| W338D                | 57.24       | 225.6                    | 56.6                              |

231 Apparent half-lives were obtained from one-phase decay fitting with a non-zero plateau and therefore describe the  
232 fitted decay behaviour under the present assay conditions. Residual activities at 1440 min are experimental values.

233

234 **Table S11.** Simple E-factor breakdown for the 50 mL-scale transformation of isoeugenol to vanillin catalysed by  
235 CpuADO W338D.

| Component             | Mass [g] | E-factor contribution [ $\text{kg}_{\text{component}} \text{kg}^{-1}_{\text{Product}}$ ] |
|-----------------------|----------|------------------------------------------------------------------------------------------|
| Product               | 0.152    | -                                                                                        |
| Non-reacted substrate | 0.205    | 0.35                                                                                     |
| Enzyme                | 0.033    | 0.22                                                                                     |
| Water                 | 47.5     | 312.5                                                                                    |
| Phosphate             | 0.237    | 1.8                                                                                      |
| DMSO                  | 2.53     | 16.6                                                                                     |
| HCl                   | 0.08     | 0.53                                                                                     |
| Ethyl acetate         | 6.28     | 41.3                                                                                     |
| Total                 | 56.895   | 374.3                                                                                    |

236 E-factor contributions were calculated from the mass of each input component relative to the mass of vanillin obtained  
237 under the current 50 mL-scale reaction conditions. Solvent recycling and wastewater treatment were not considered  
238 in this simplified analysis.

239

#### 240 **Discussion of the E-factor analysis**

241 A simple E-factor analysis of the 50 mL-scale transformation of isoeugenol to vanillin provides an initial indication  
242 of the environmental impact of the proposed reaction. In total, 374 kg of waste are generated per kg of vanillin. Of  
243 this, 98% is solvent-related (83% water, 11% ethyl acetate, and 4% DMSO). Consequently, further development  
244 should focus on reducing wastewater formation, preferably by increasing the substrate concentration. In addition,  
245 DMSO should be avoided as a water-miscible co-solvent, as it is likely to complicate product isolation at preparative  
246 scale. A potential strategy to address these issues may be the implementation of a fed-batch addition of isoeugenol.  
247 The limited aqueous solubility of vanillin may further facilitate product isolation by simple filtration.

248 With regard to the buffer system, alternatives to non-renewable phosphate should be explored. Given that the overall  
249 reaction is pH-neutral, it may even be possible to omit buffering altogether.

250 The enzyme performance (E-factor contribution of  $0.22 \text{ kg kg}^{-1}$ ) is not critical from an environmental perspective.  
251 Nevertheless, a productivity of approximately  $4 \text{ kg product kg}^{-1}$  enzyme is unlikely to be economically viable.  
252 Accordingly, further research should focus on identifying the factors limiting catalytic performance.

253

254

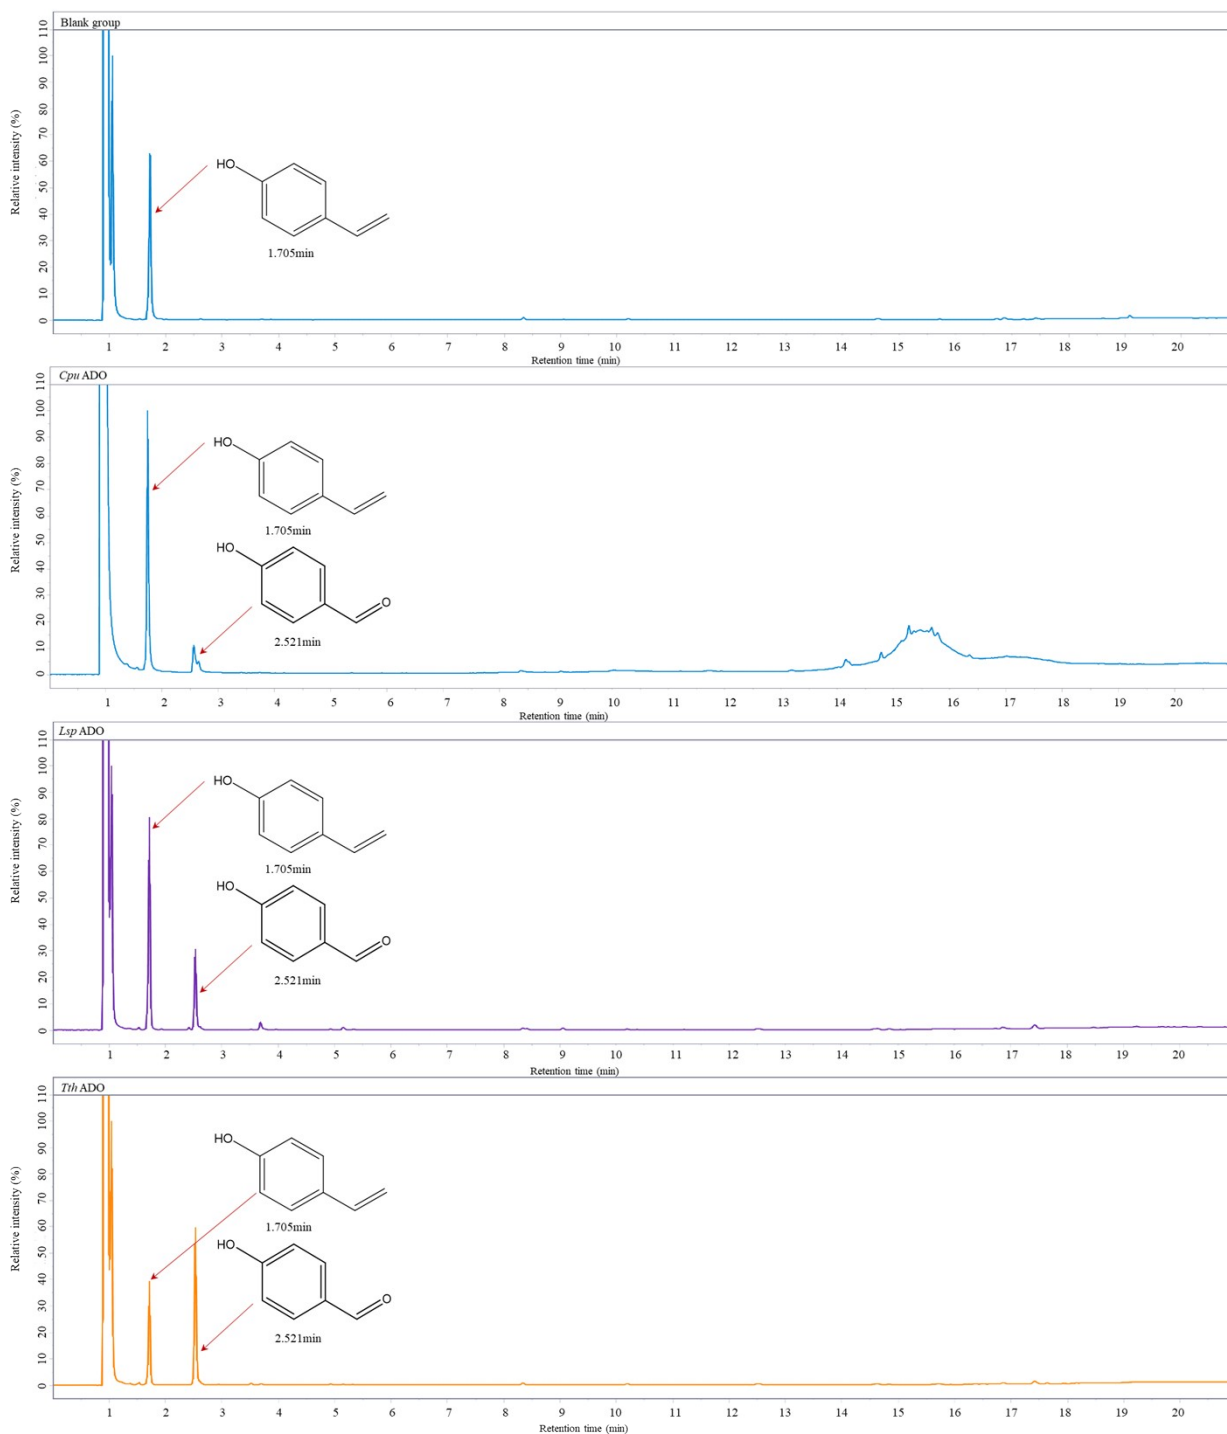

255

256 **Figure S24-1.** Gas chromatography results of the blank control group and different ADOs using 4-vinylphenol as a  
 257 substrate

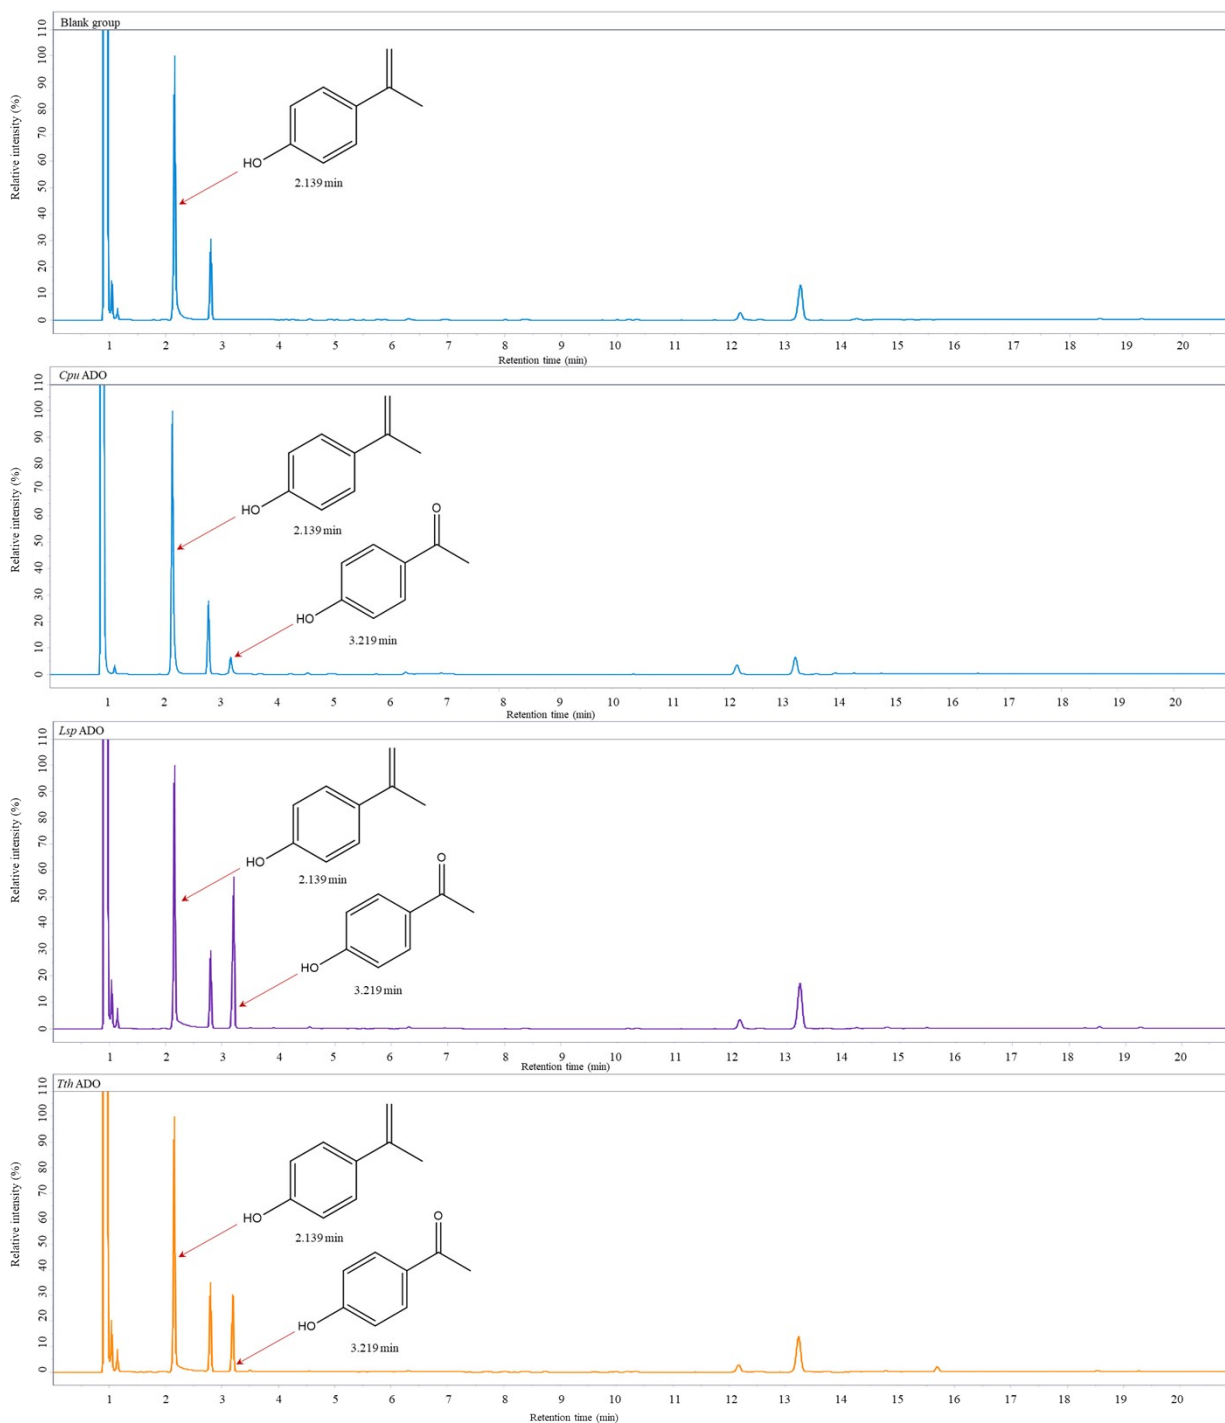

258

259

260 **Figure S24-2.** Gas chromatography results of the blank control group and different ADOs using isopropenylphenol  
 261 as substrate

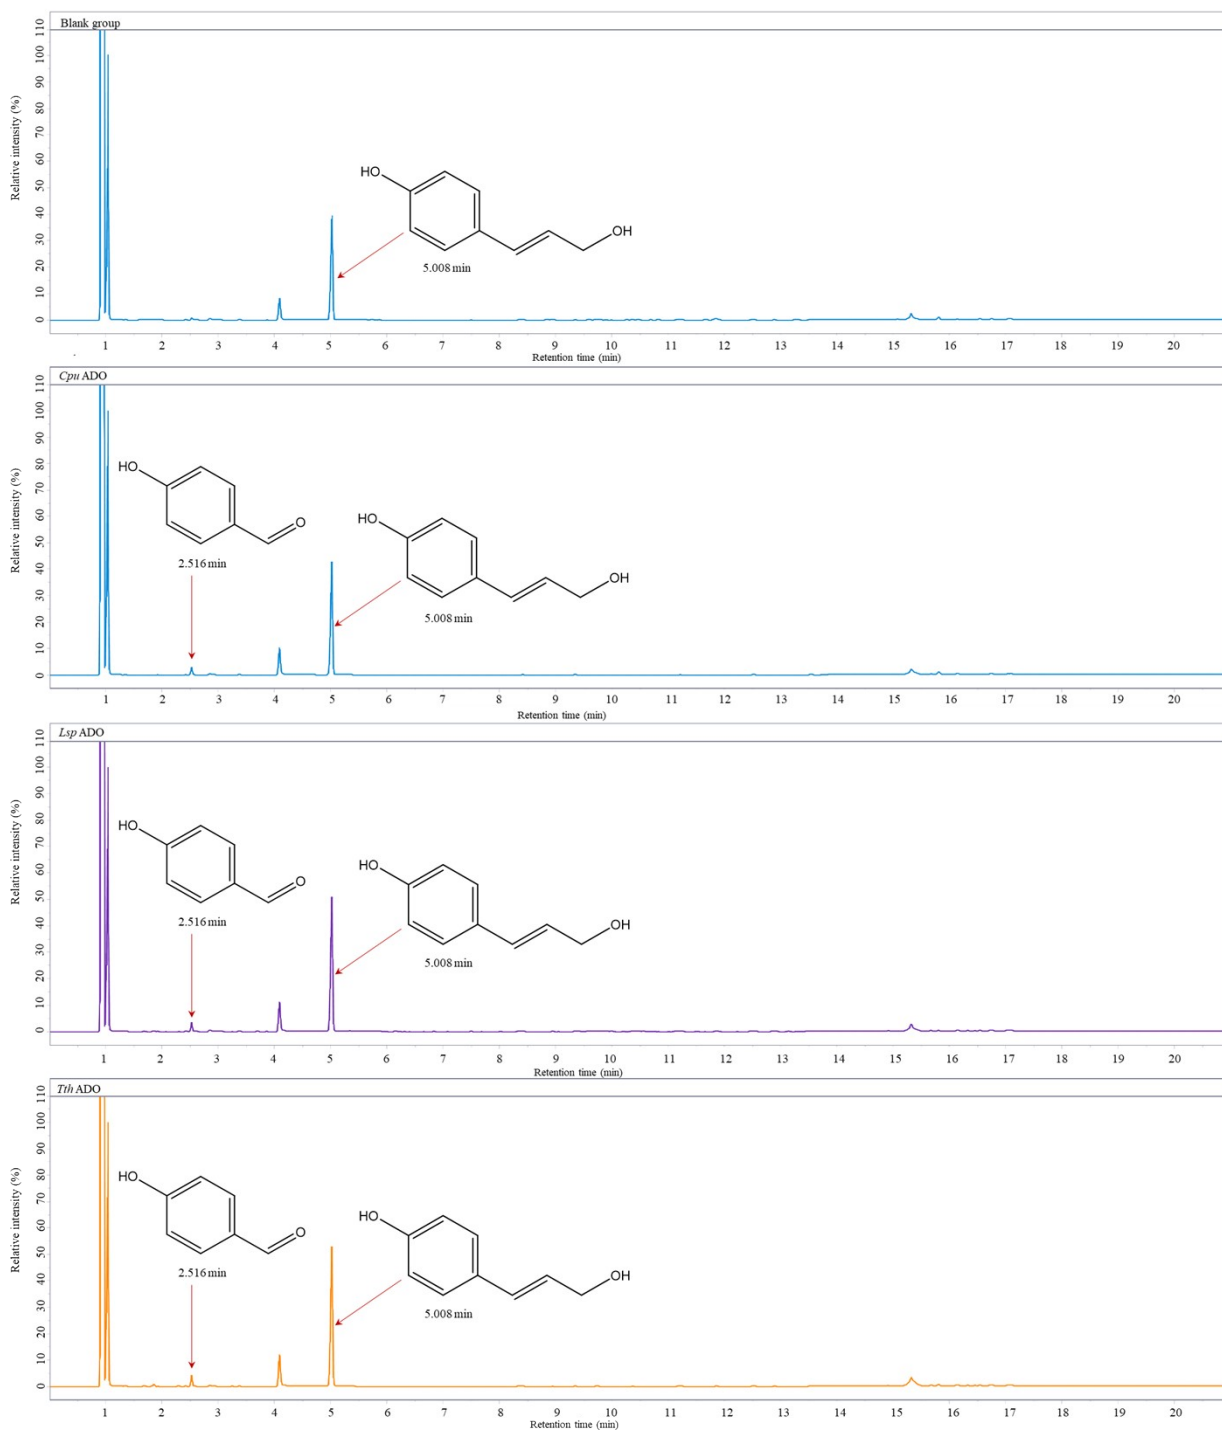

262

263

264 **Figure S24-3.** Gas chromatography results of the blank control group and different ADOs using *p*-coumaryl alcohol

265 as substrate

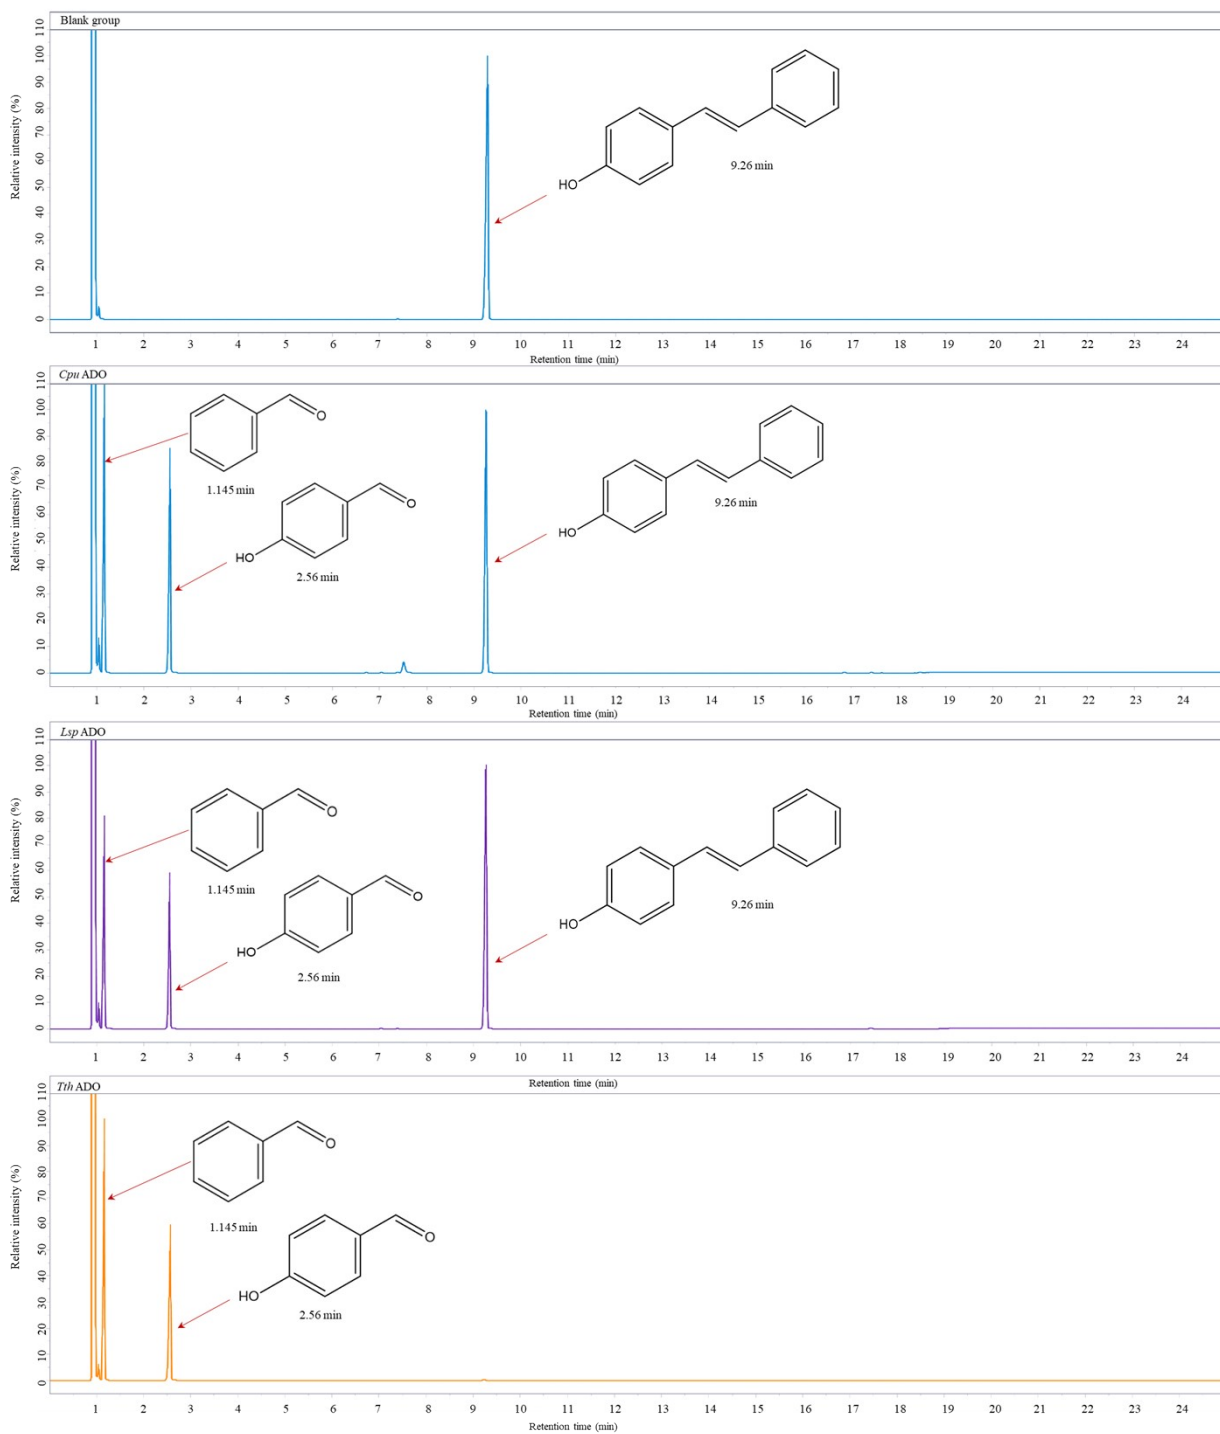

266

267

268

269 **Figure S24-4.** Gas chromatography results of the blank control group and different ADOs using *trans*-4-

270 hydroxystilbene as substrate

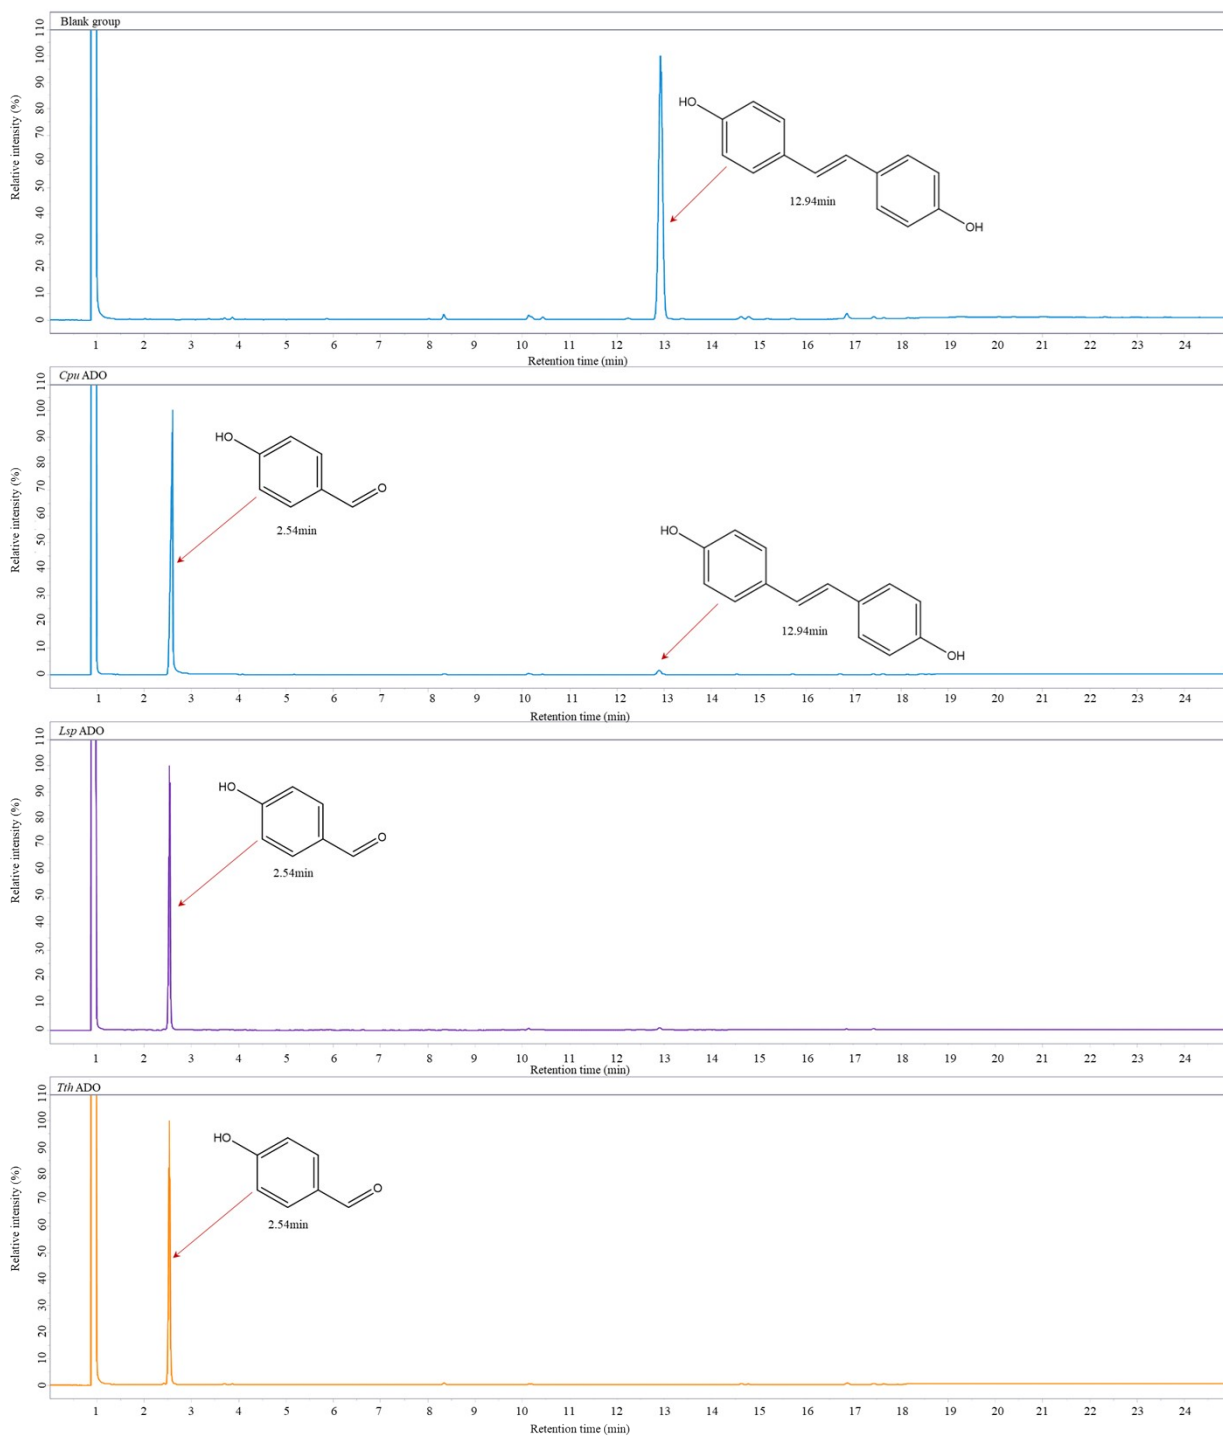

271

272

273 **Figure S24-5.** Gas chromatography results of the blank control group and different ADOs using 4,4'-

274 dihydroxystilbene as substrate

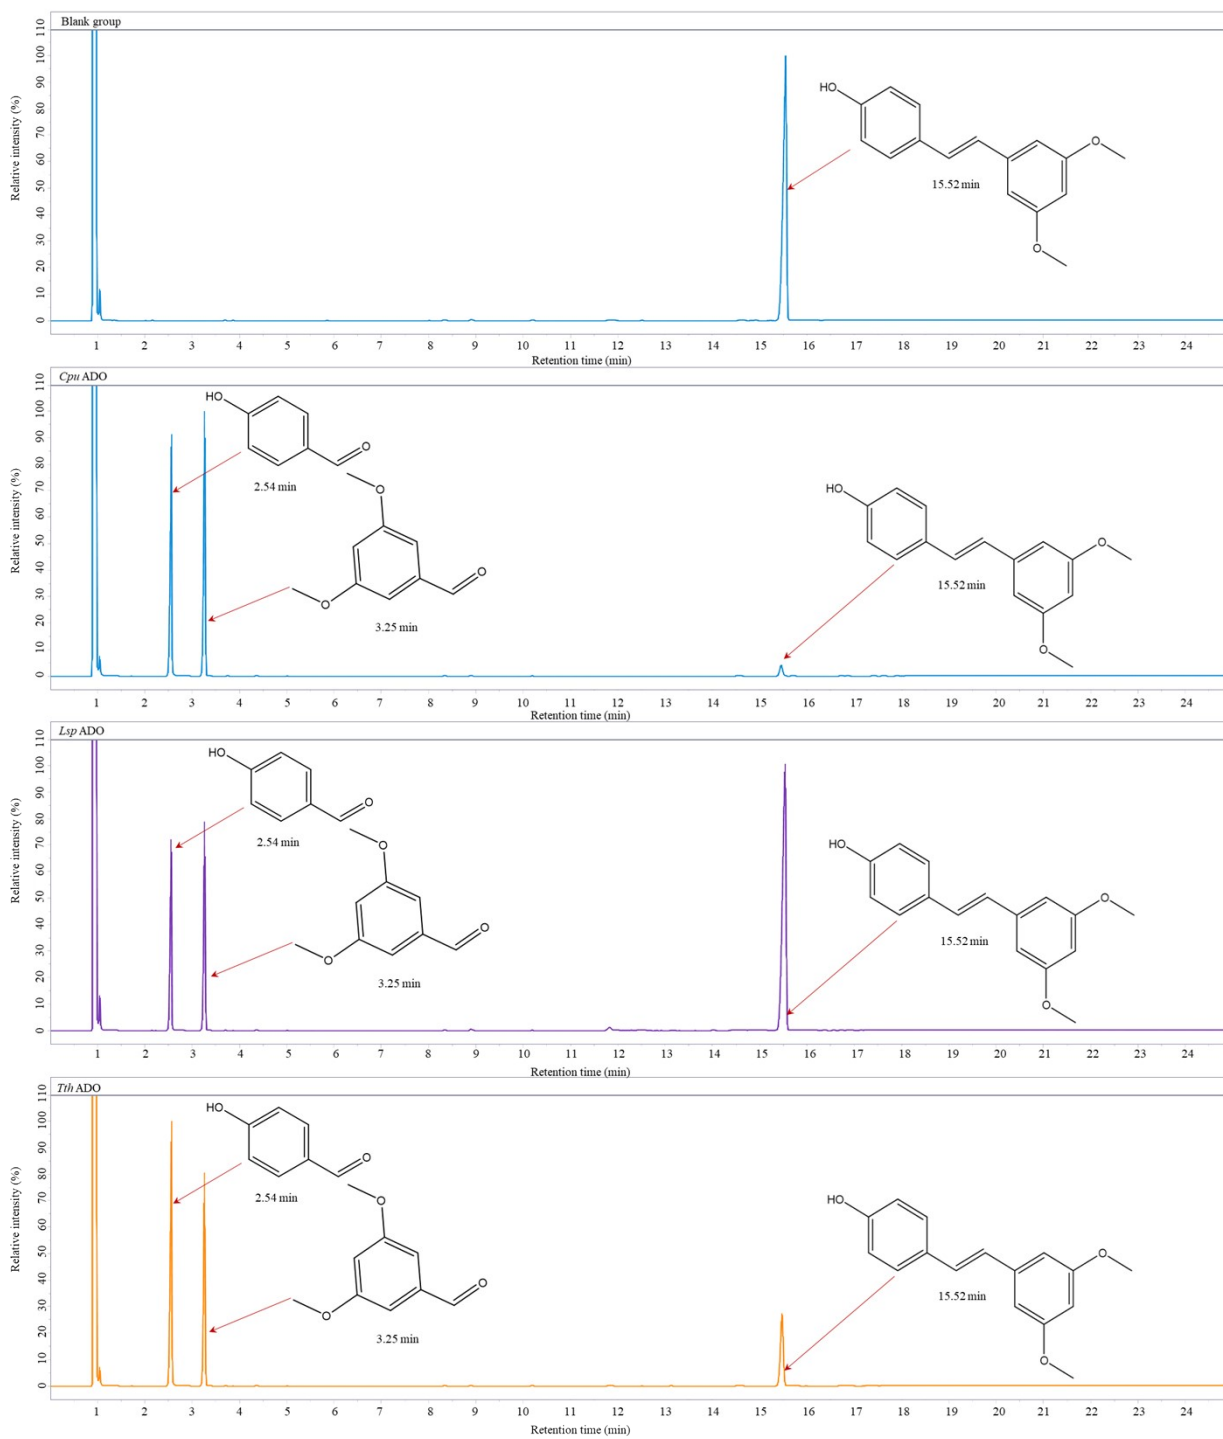

275

276

277 **Figure S24-6.** Gas chromatography results of the blank control group and different ADOs using 4-(3,5-  
 278 dimethoxystyryl)phenol as substrate

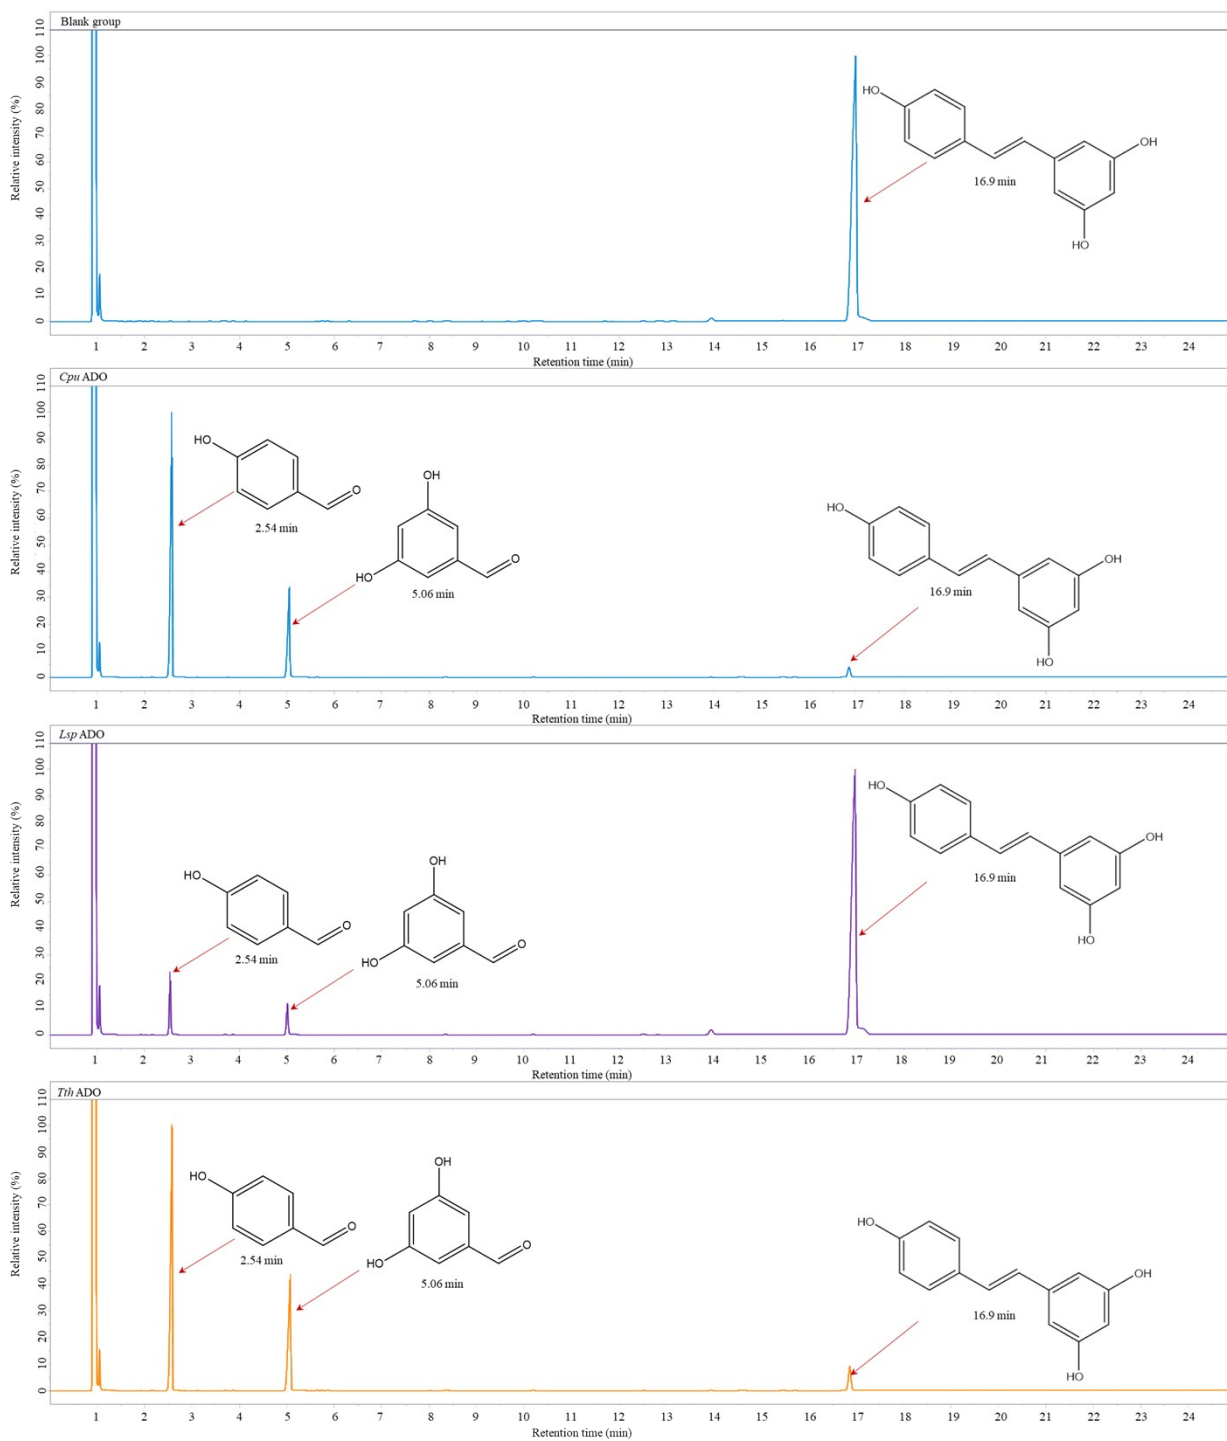

279

280 **Figure S24-7.** Gas chromatography results of the blank control group and different ADOs using resveratrol as  
 281 substrate

282

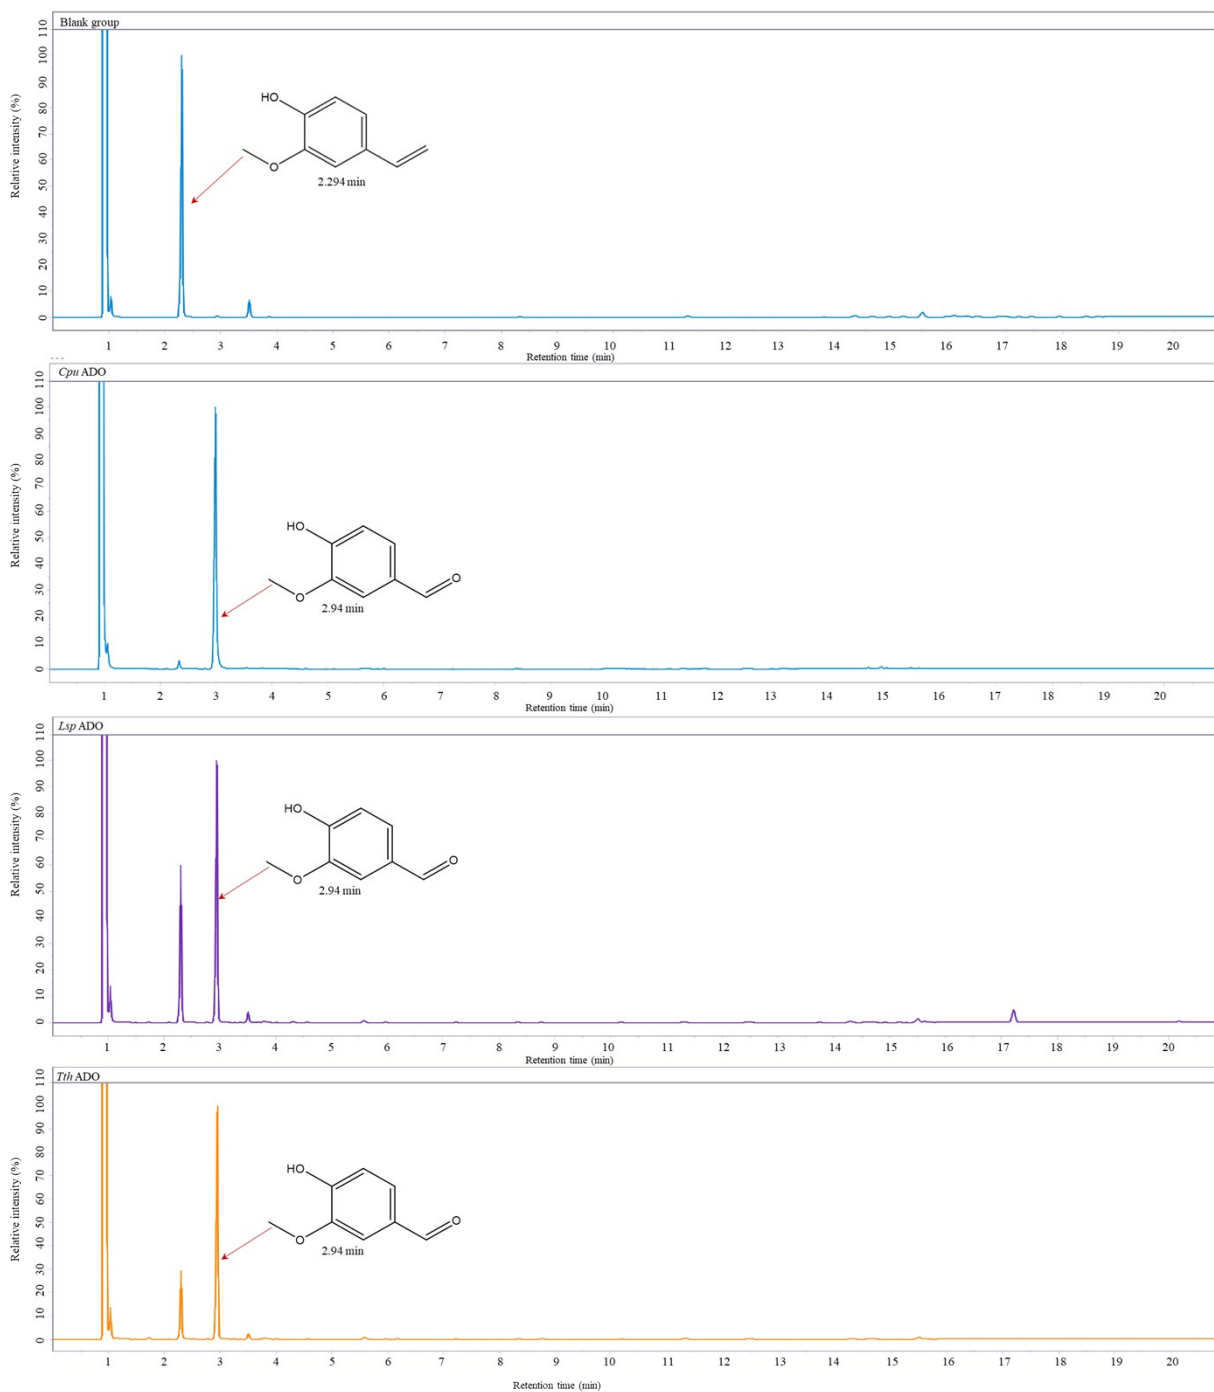

283

284 **Figure S24-8.** Gas chromatography results of the blank control group and different ADOs using 4-vinylguaiacol as  
 285 substrate

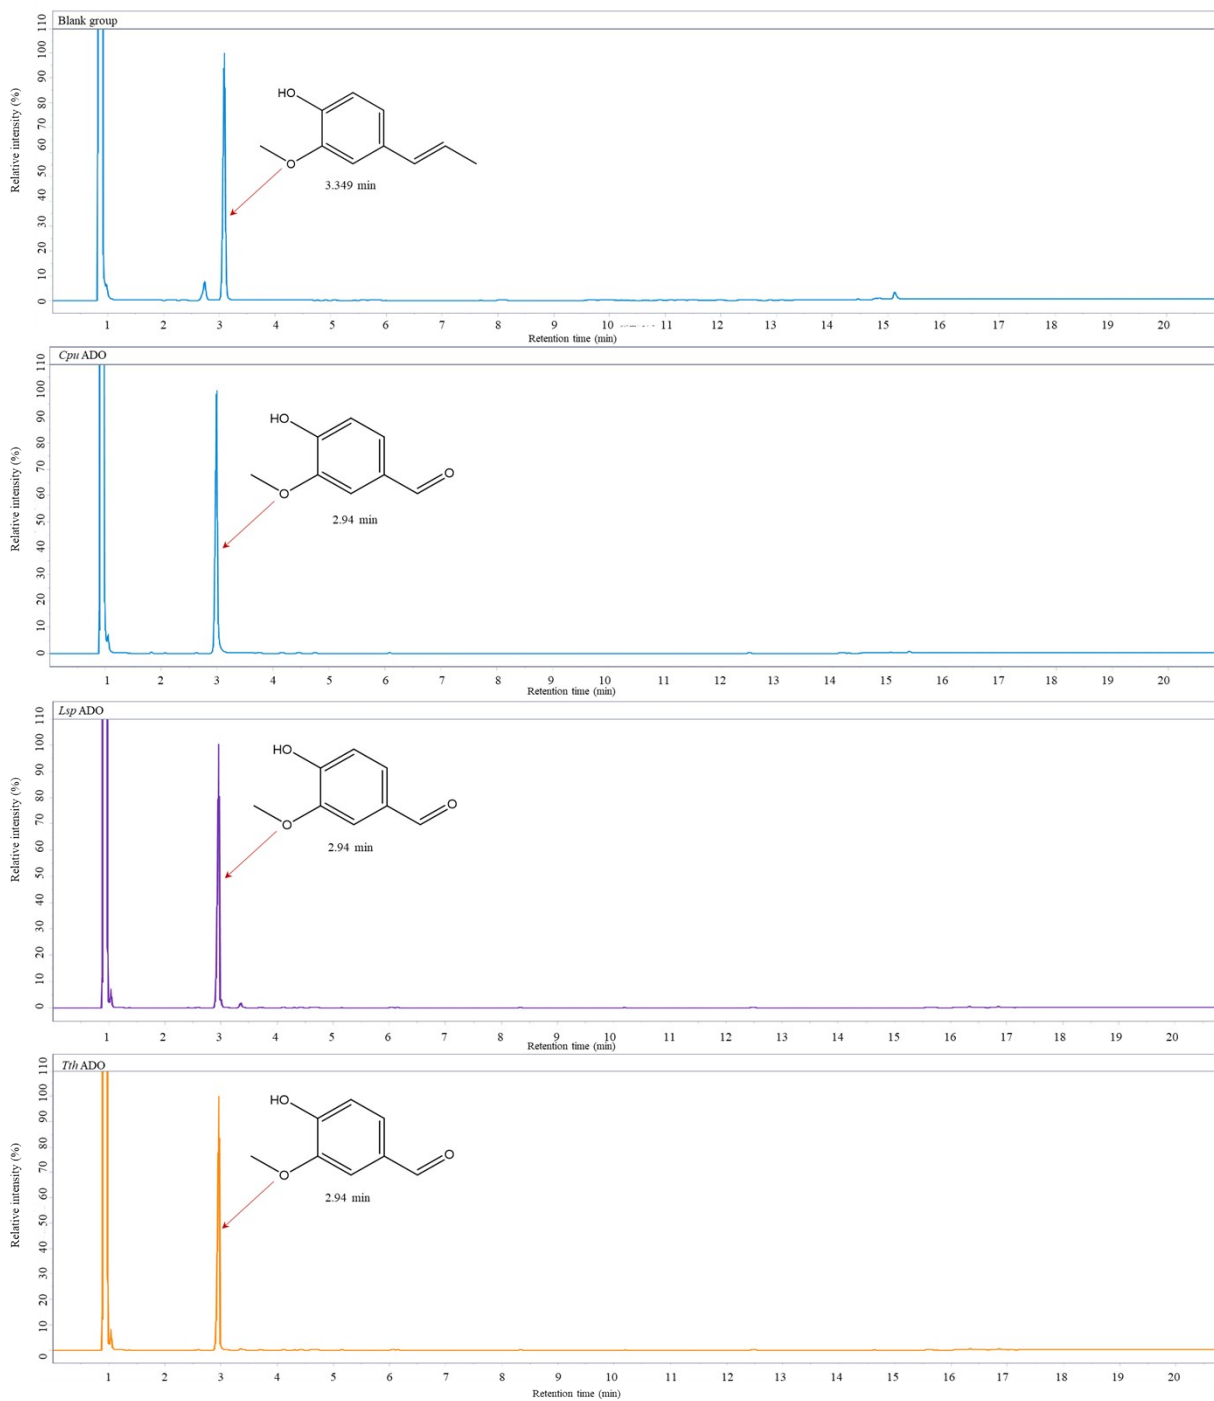

286  
 287  
 288  
 289  
 290

**Figure S24-9.** Gas chromatography results of the blank control group and different ADOs using isoeugenol as substrate

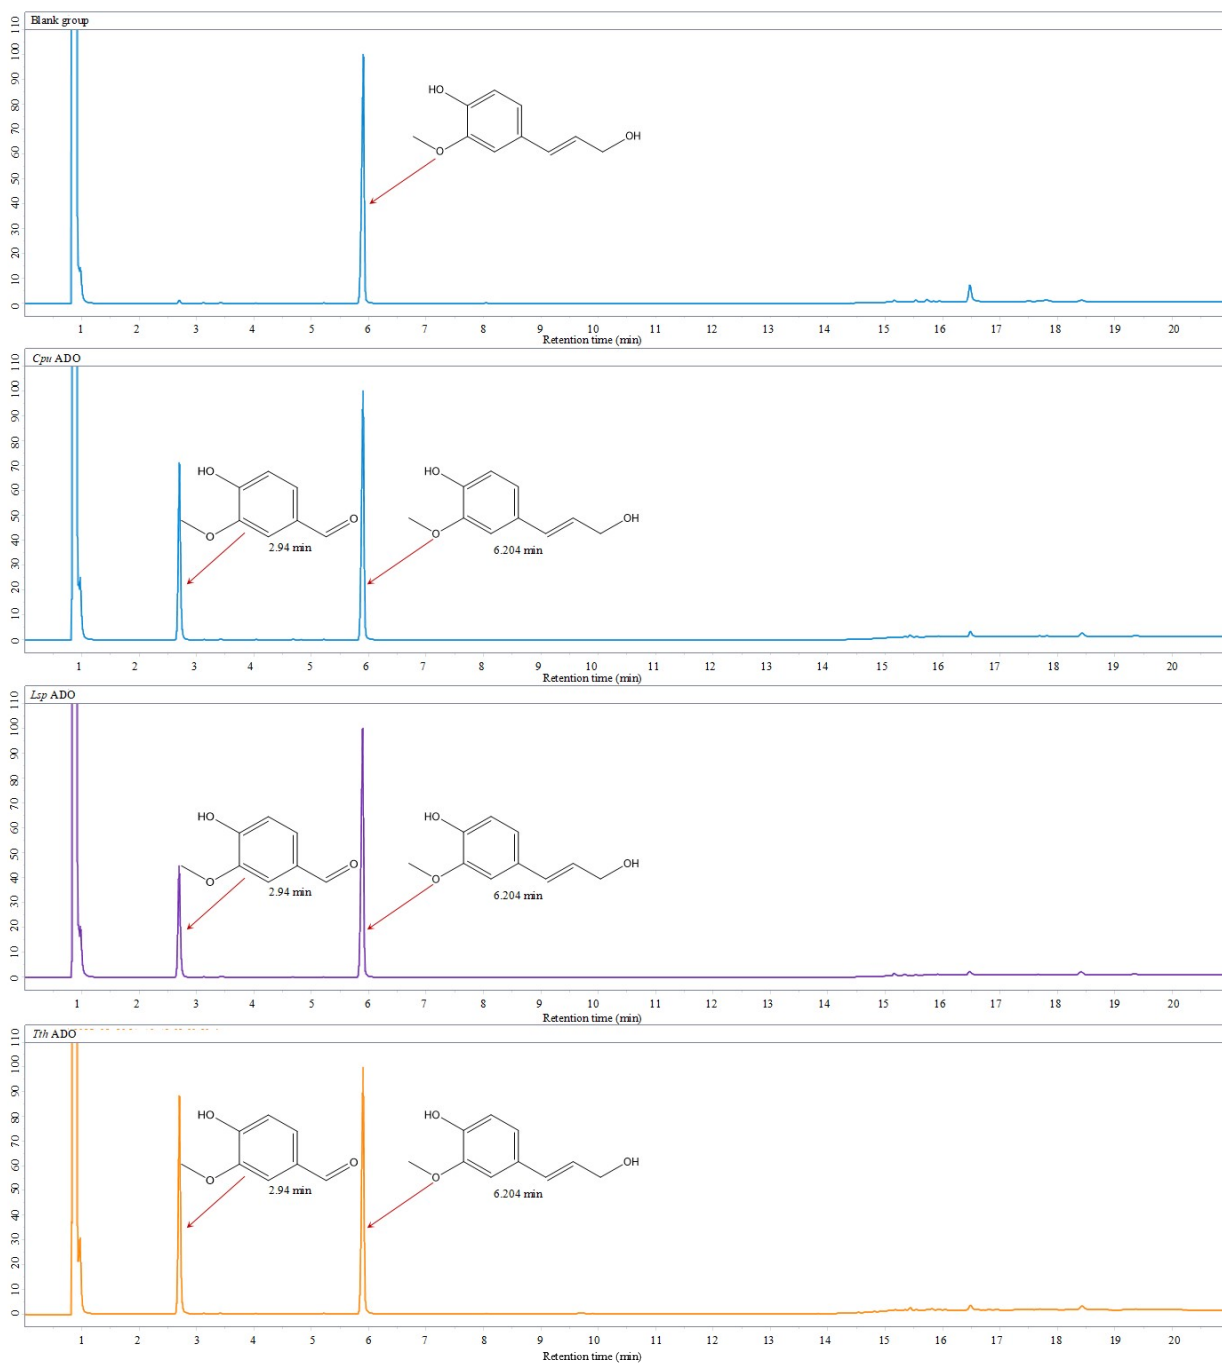

291

292

293 **Figure S24-10.** Gas chromatography results of the blank control group and different ADOs using coniferol as

294 substrate

295

296

297

298

299

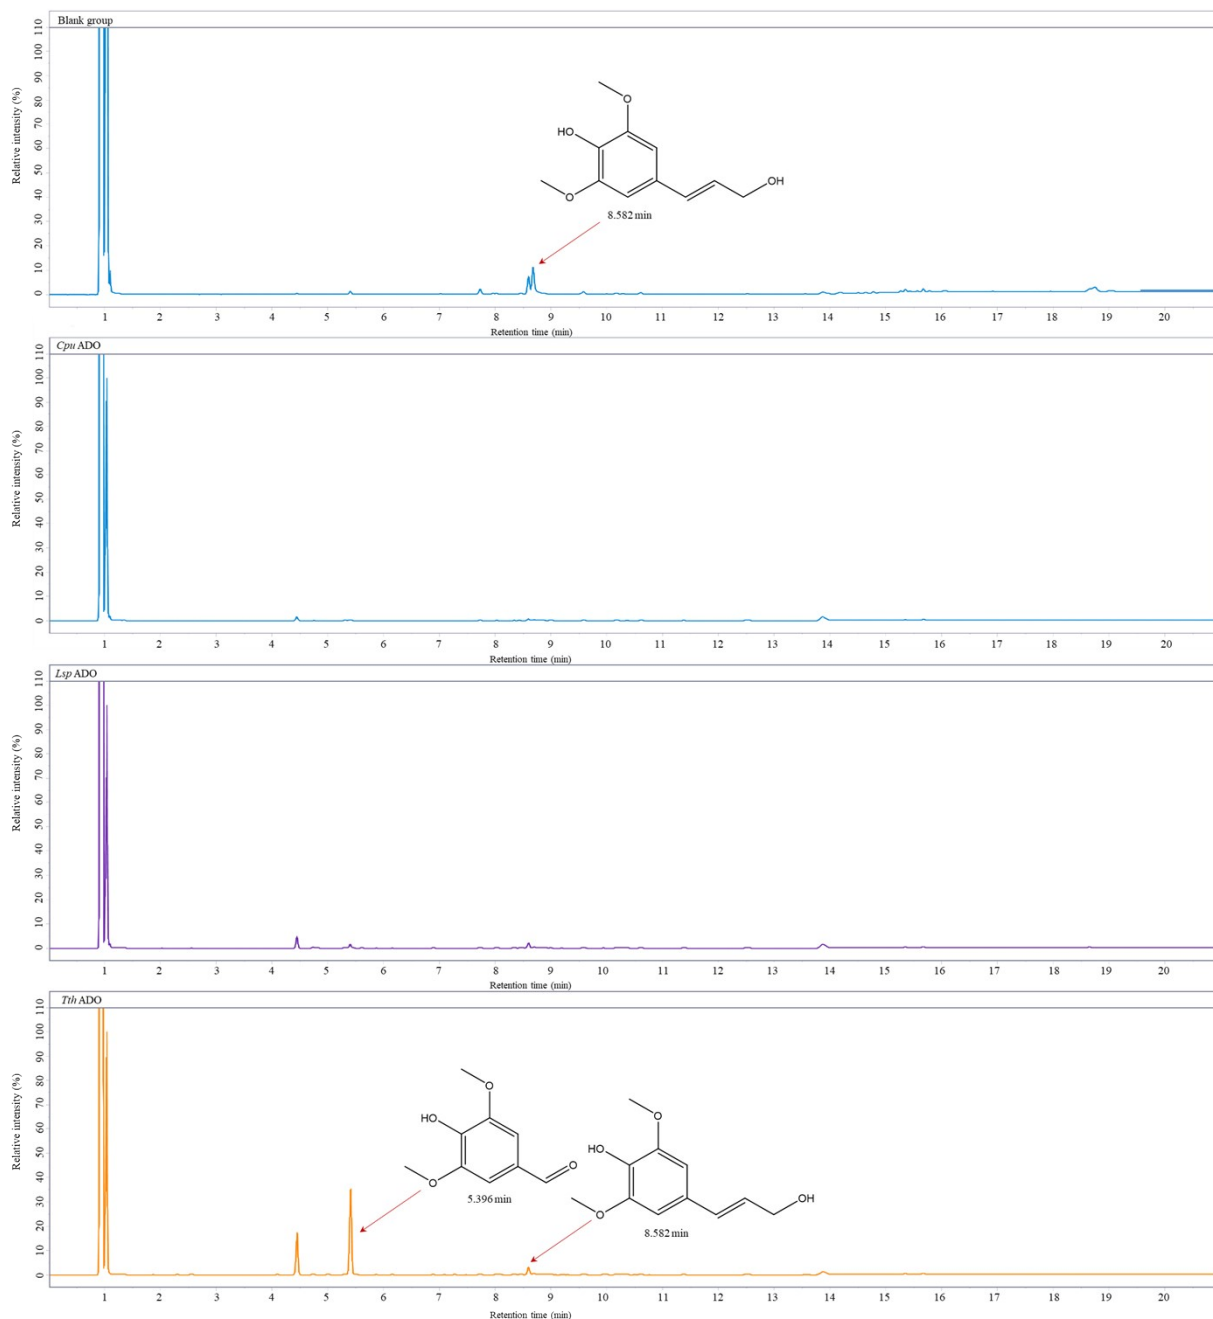

300

301 **Figure S24-11.** Gas chromatography results of the blank control group and different ADOs using sinapyl alcohol as

302 substrate

303

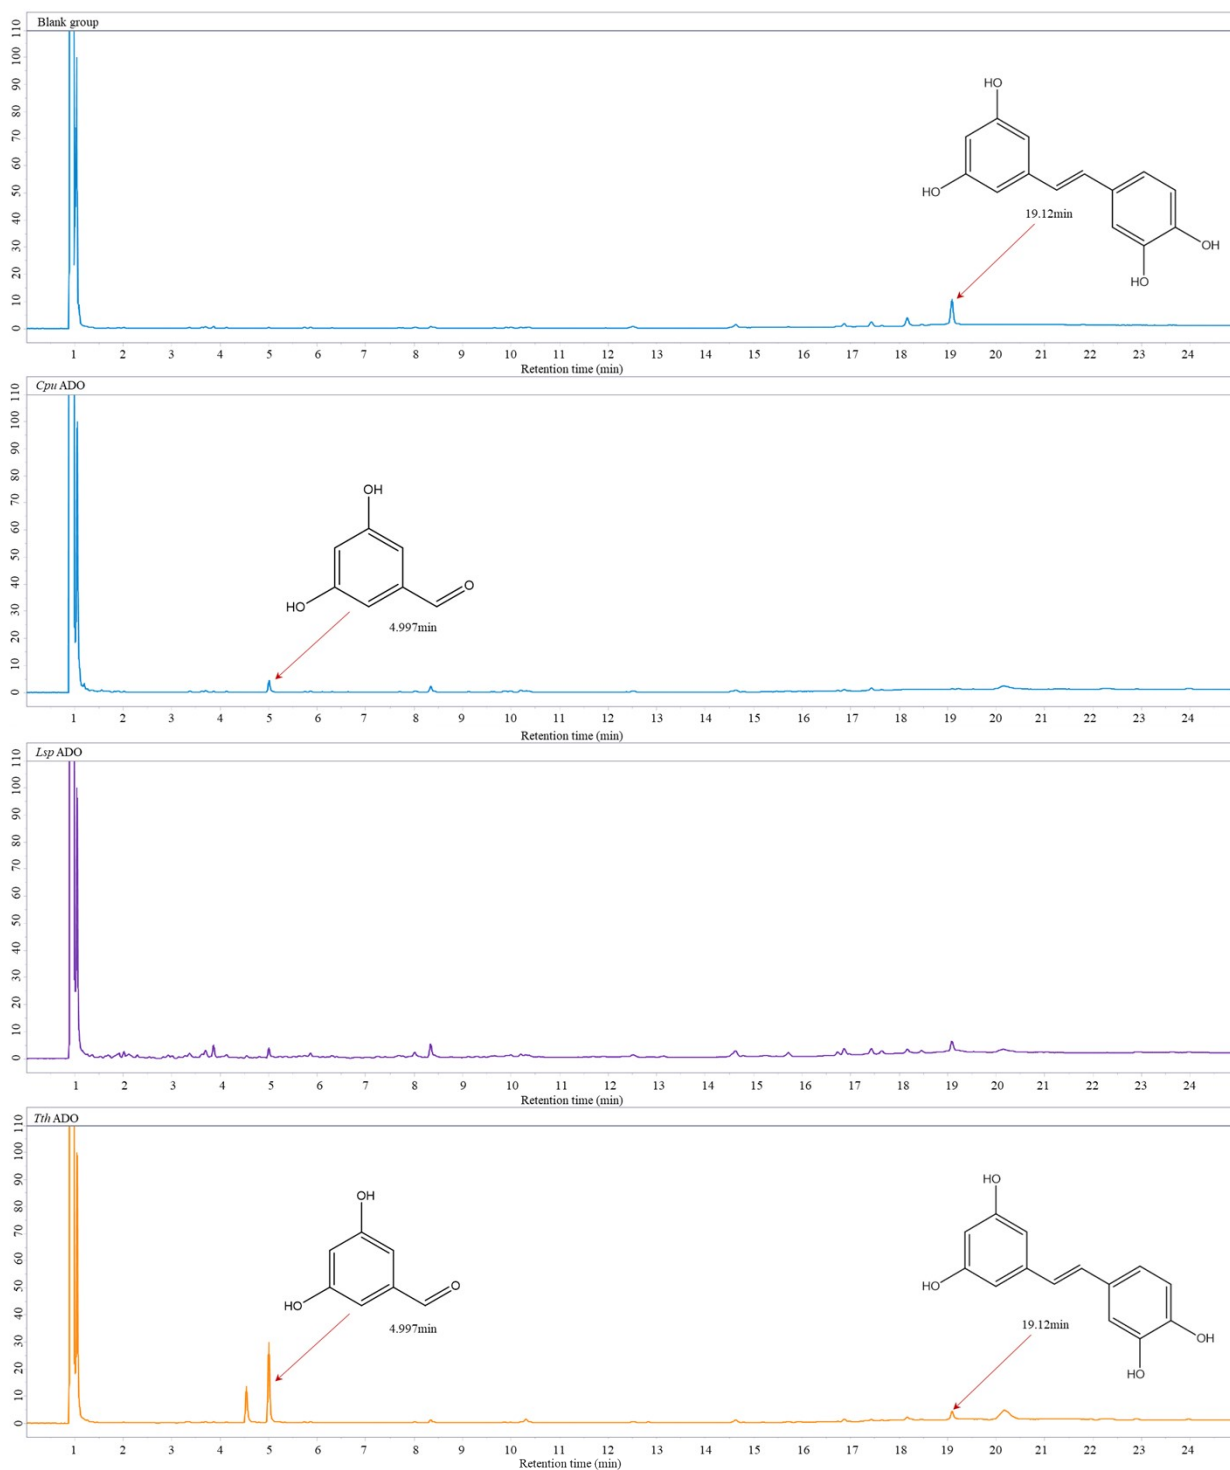

304

305 **Figure S24-12.** Gas chromatography results of the blank control group and different ADOs using picotannol as  
 306 substrate

307

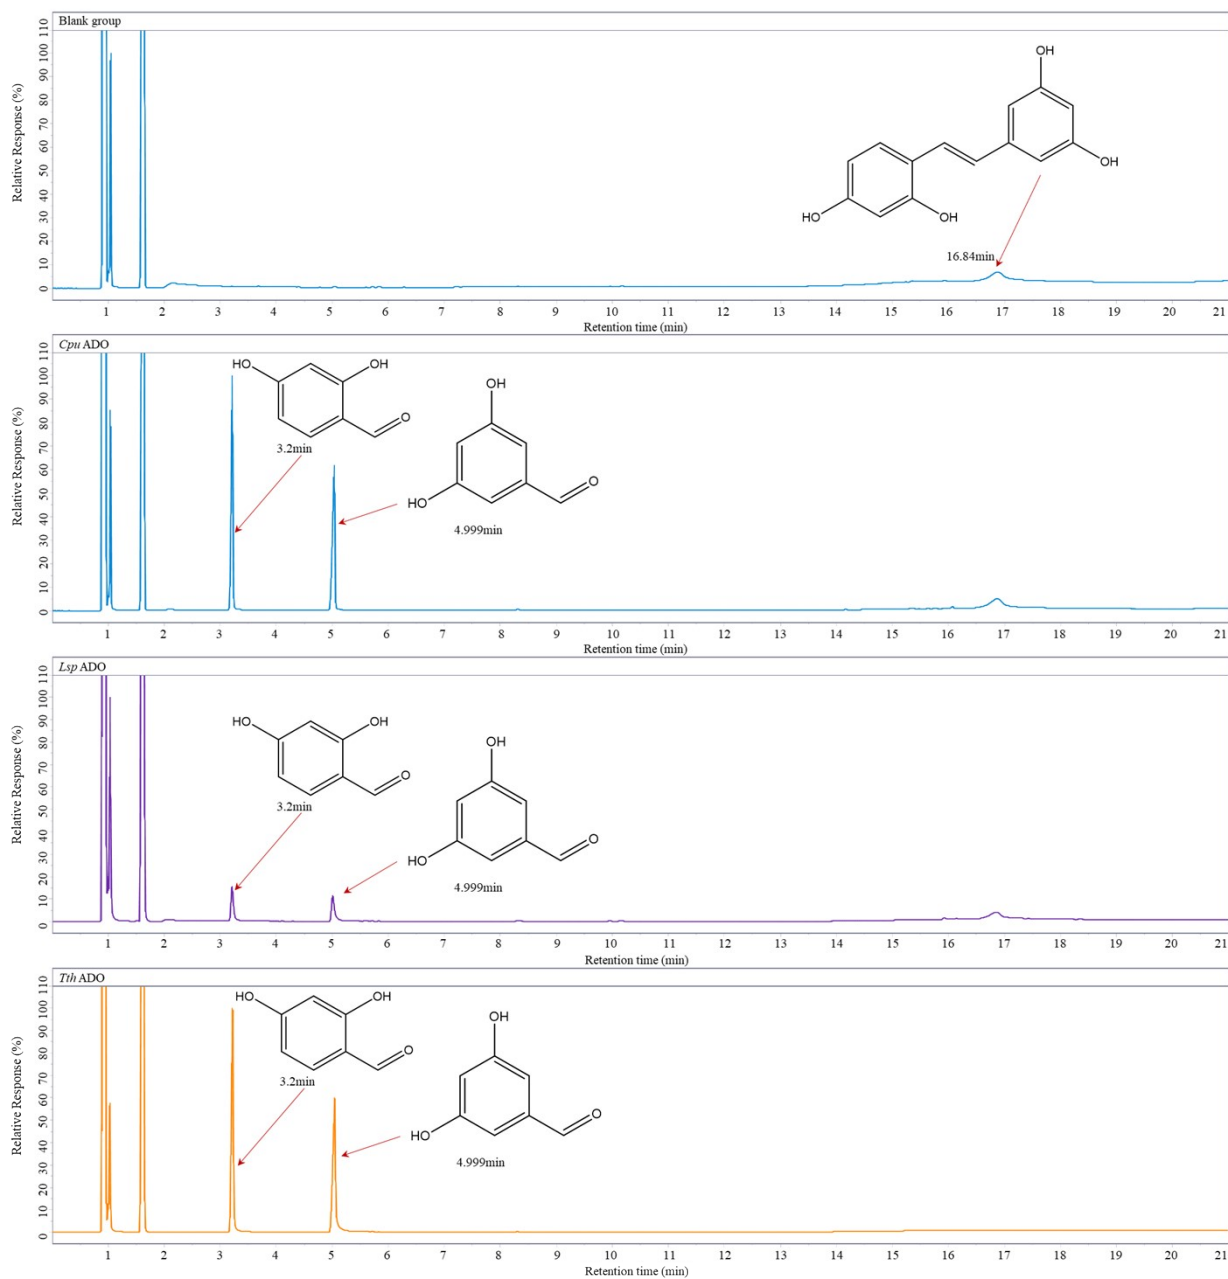

308

309 **Figure S24-13.** Gas chromatography results of the blank control group and different ADOs using Oxyresveratrol as  
 310 substrate

311

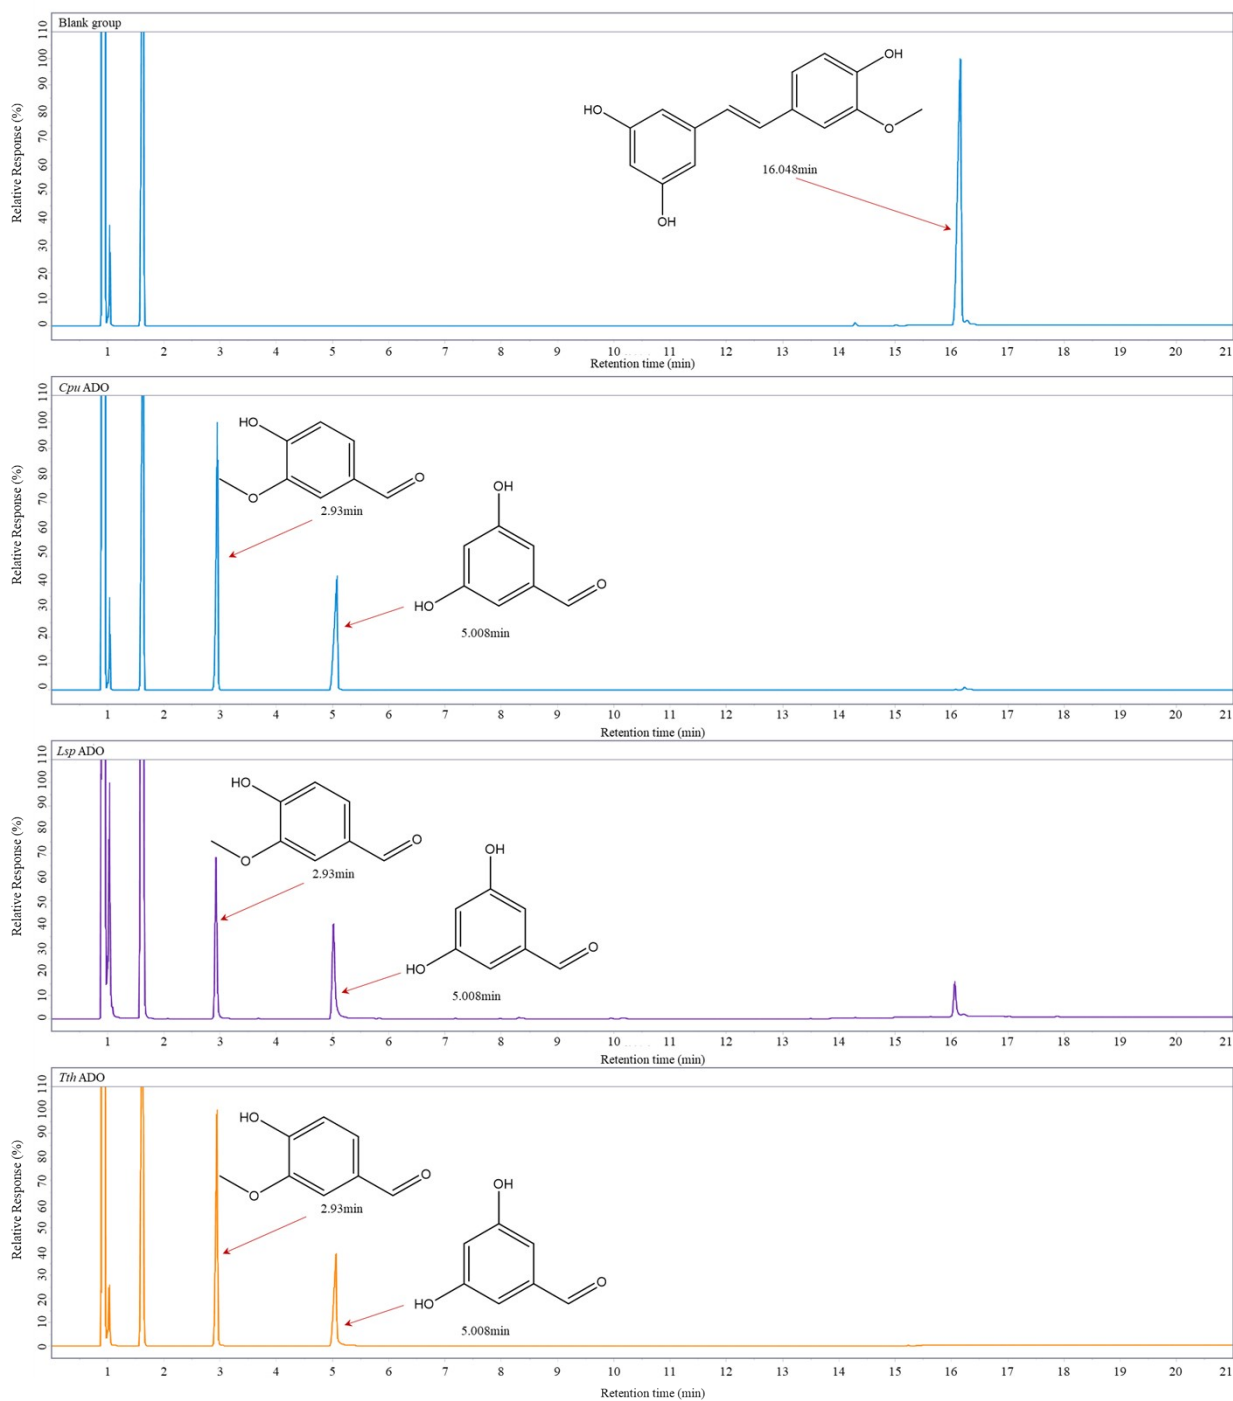

312

313 Figure S24-14. Gas chromatography results of the blank control group and different ADOs using Isorhapontigenin as  
 314 substrate

315

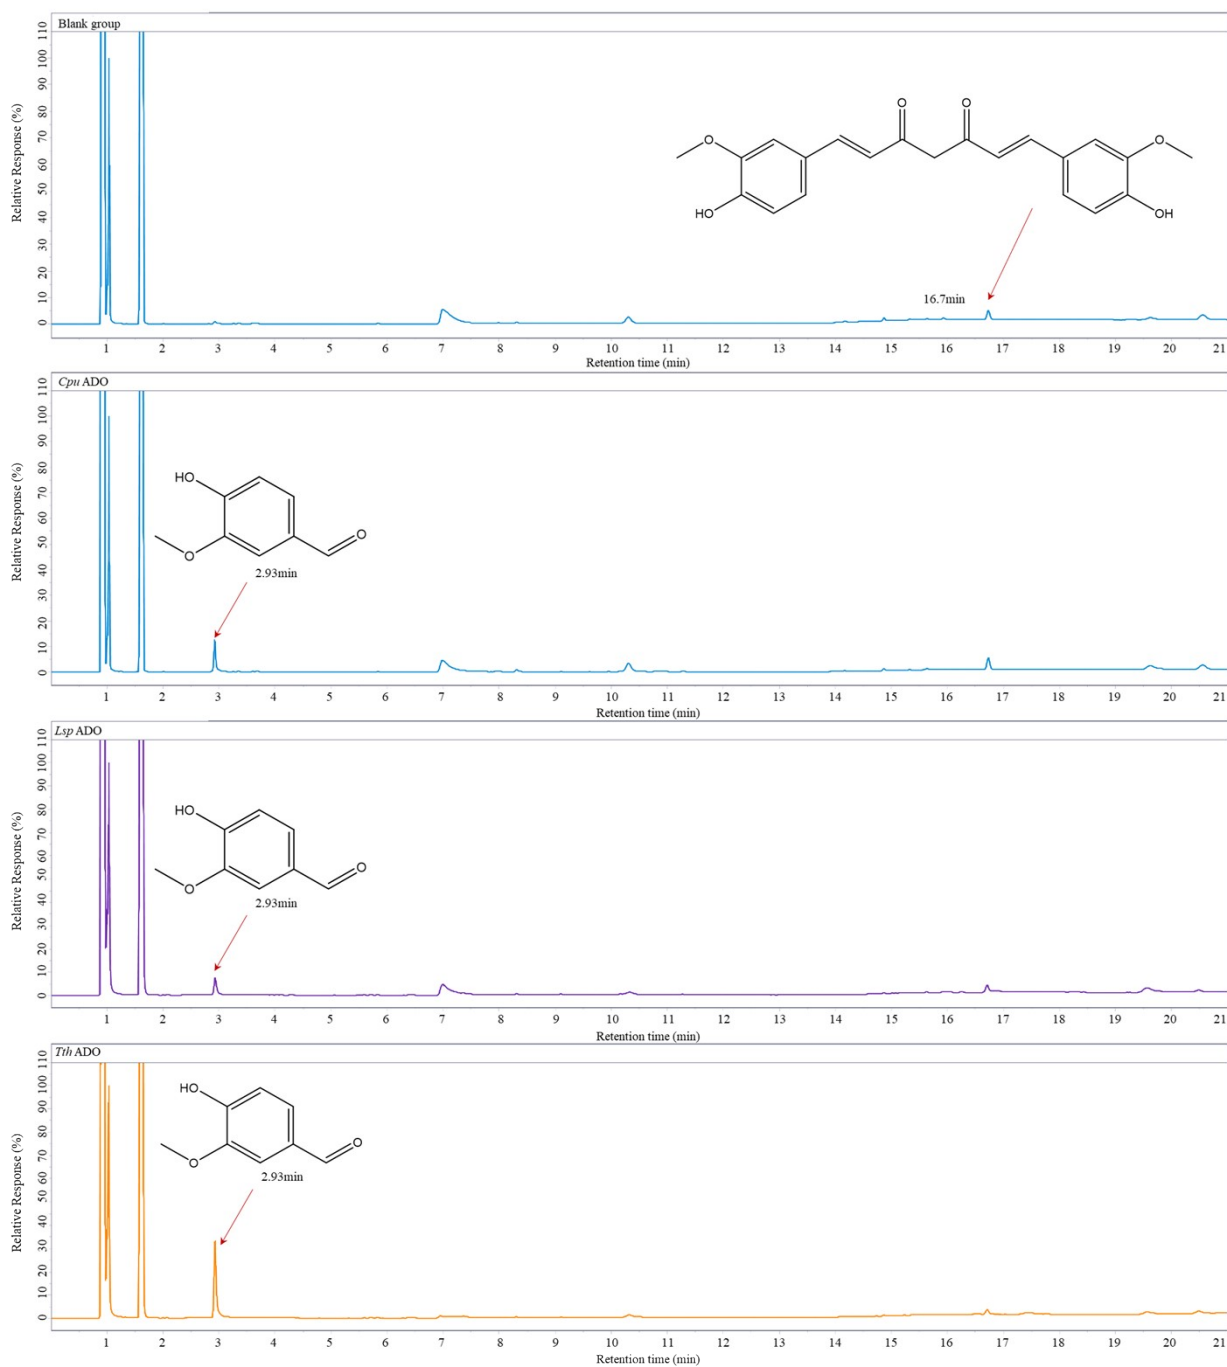

316

317 Figure S24-15. Gas chromatography results of the blank control group and different ADOs using Curcumin as  
 318 substrate

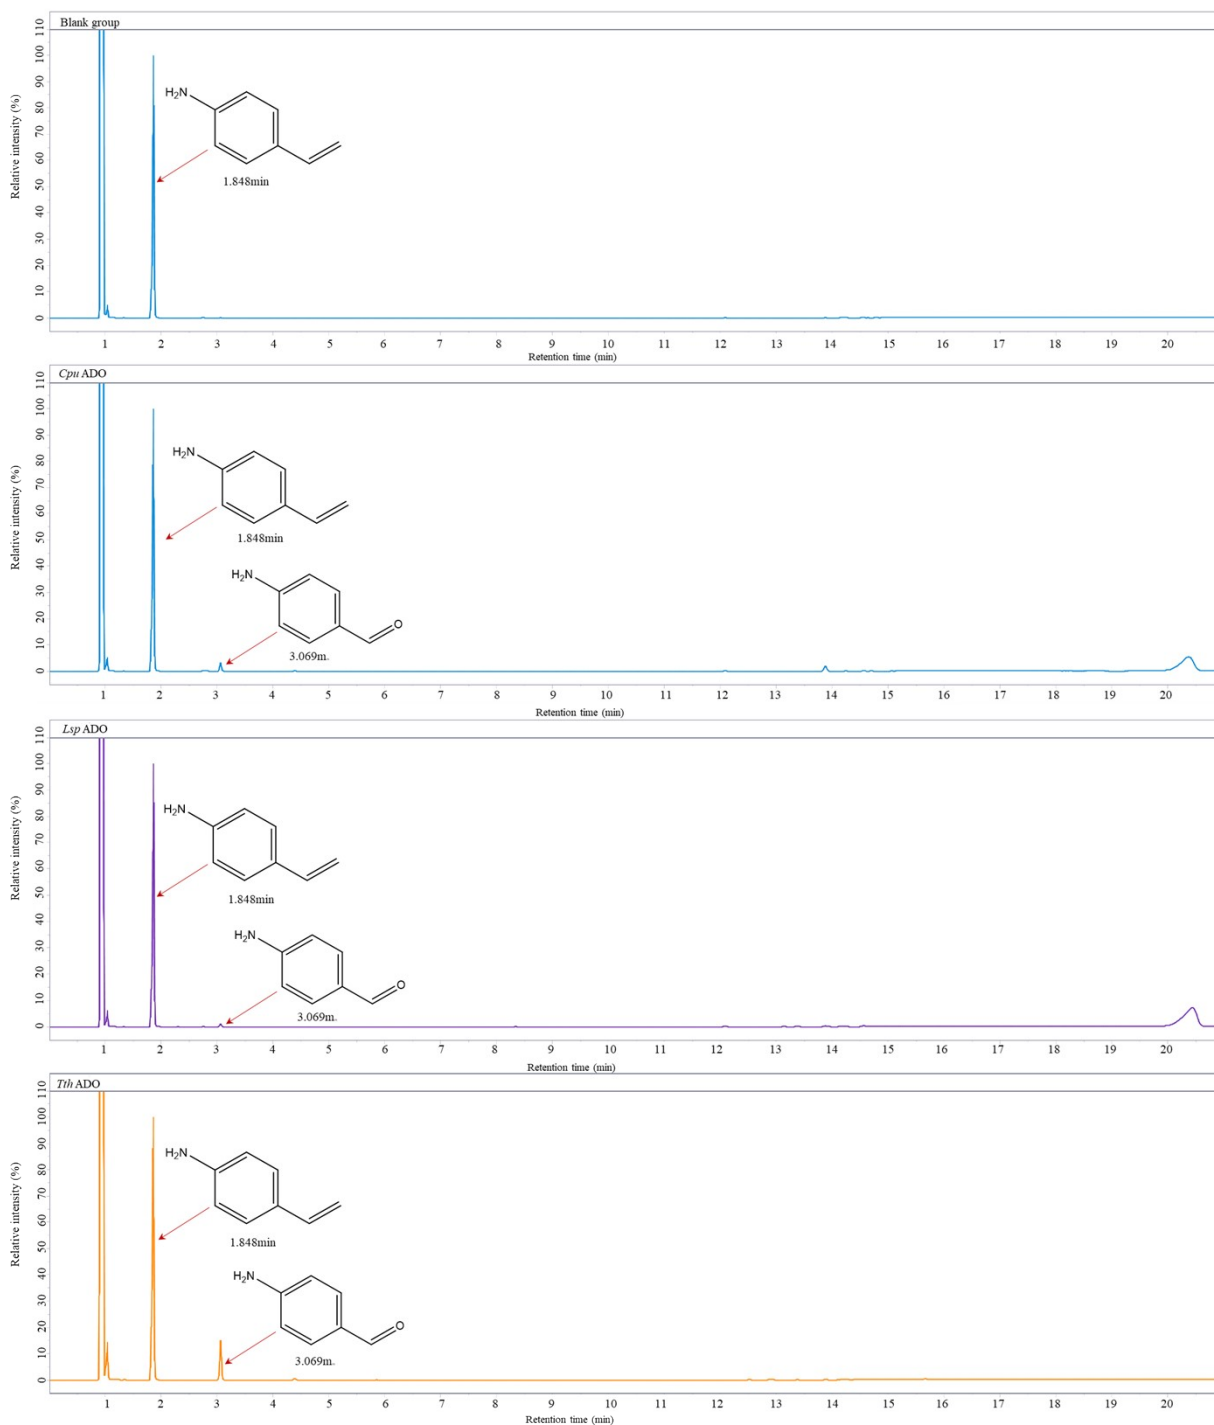

319

320 **Figure S24-16.** Gas chromatography results of the blank control group and different ADOs using 4-vinylaniline as  
 321 substrate

322

323

324

325

326

327

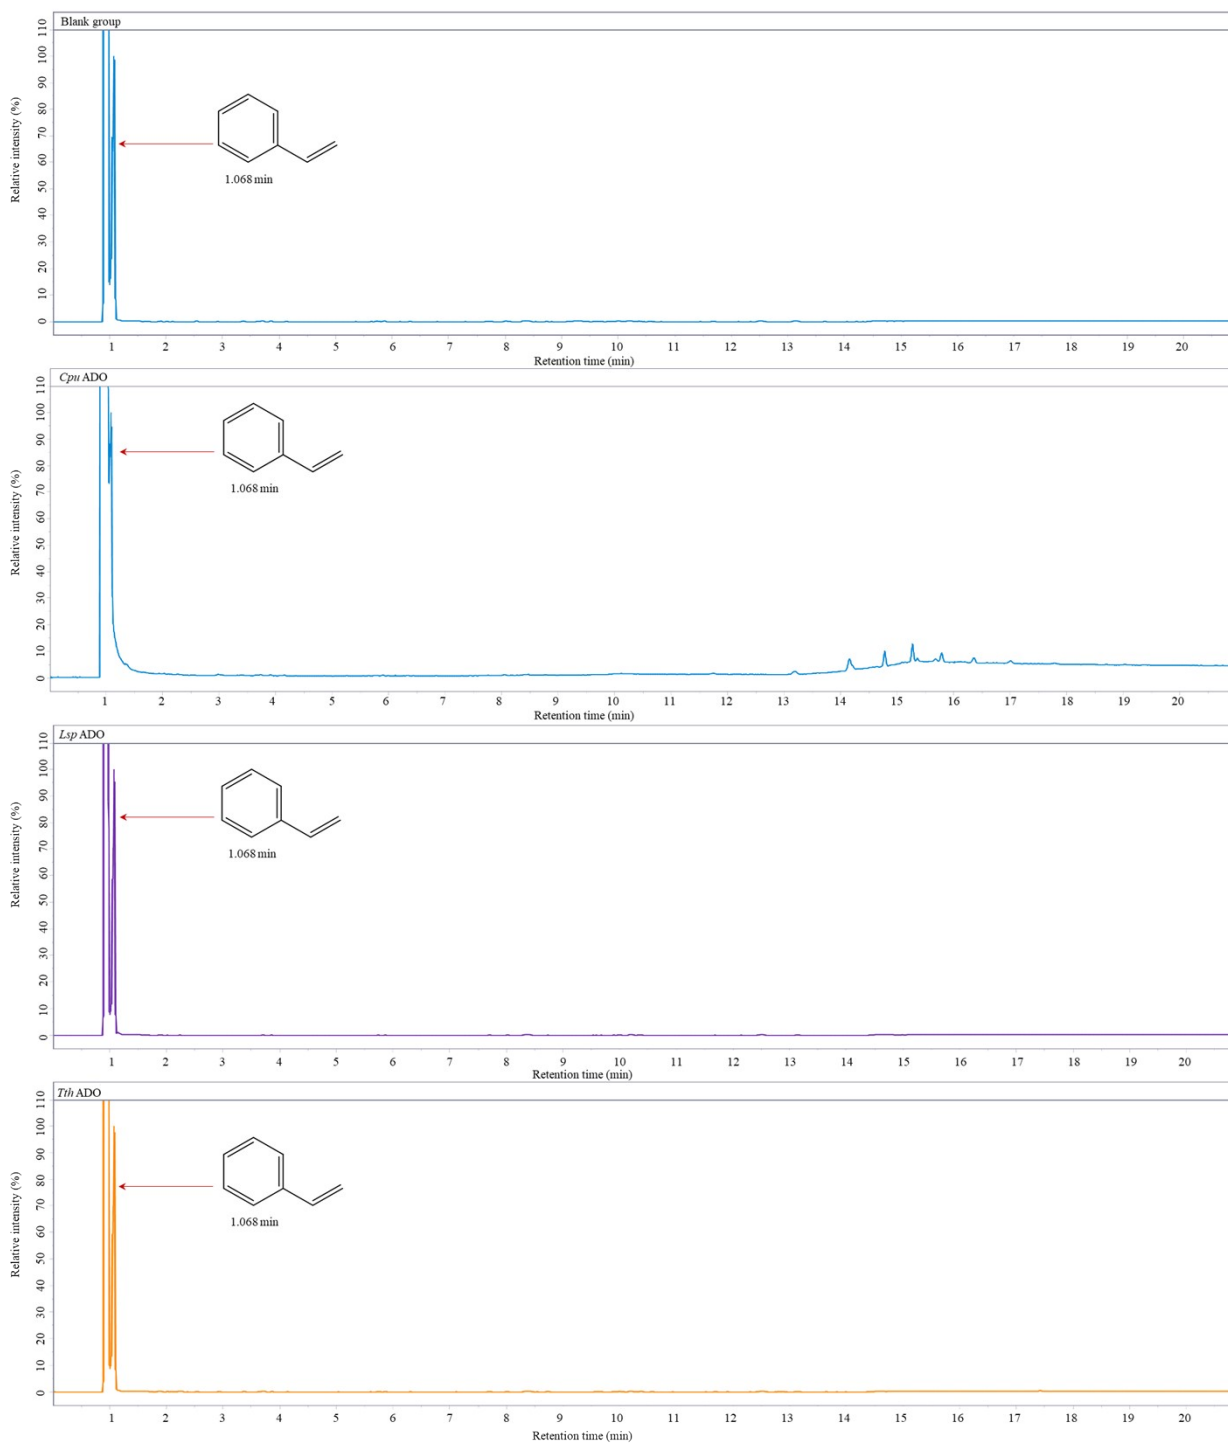

328

329

330

331 **Figure S24-17.** Gas chromatography results of the blank control group and different ADOs using styrene as substrate

332

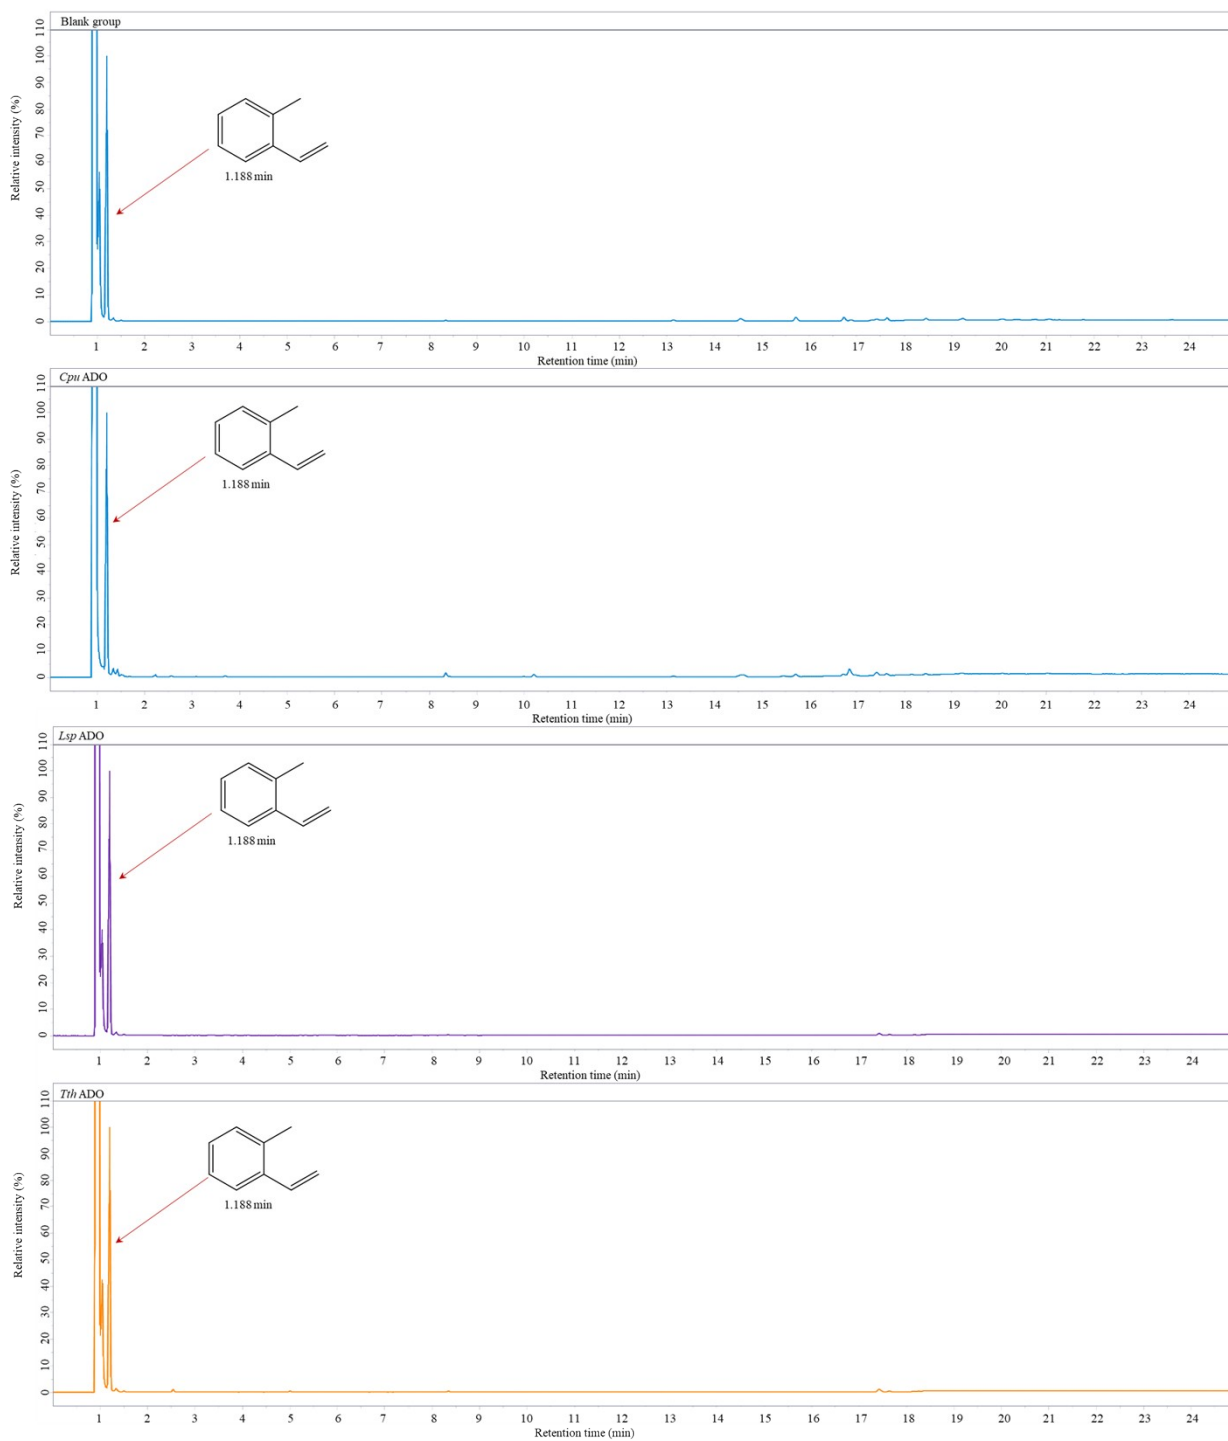

333

334

**Figure S24-18.** Gas chromatography results of the blank control group and different ADOs using 2-methylstyrene as substrate

335

336

337

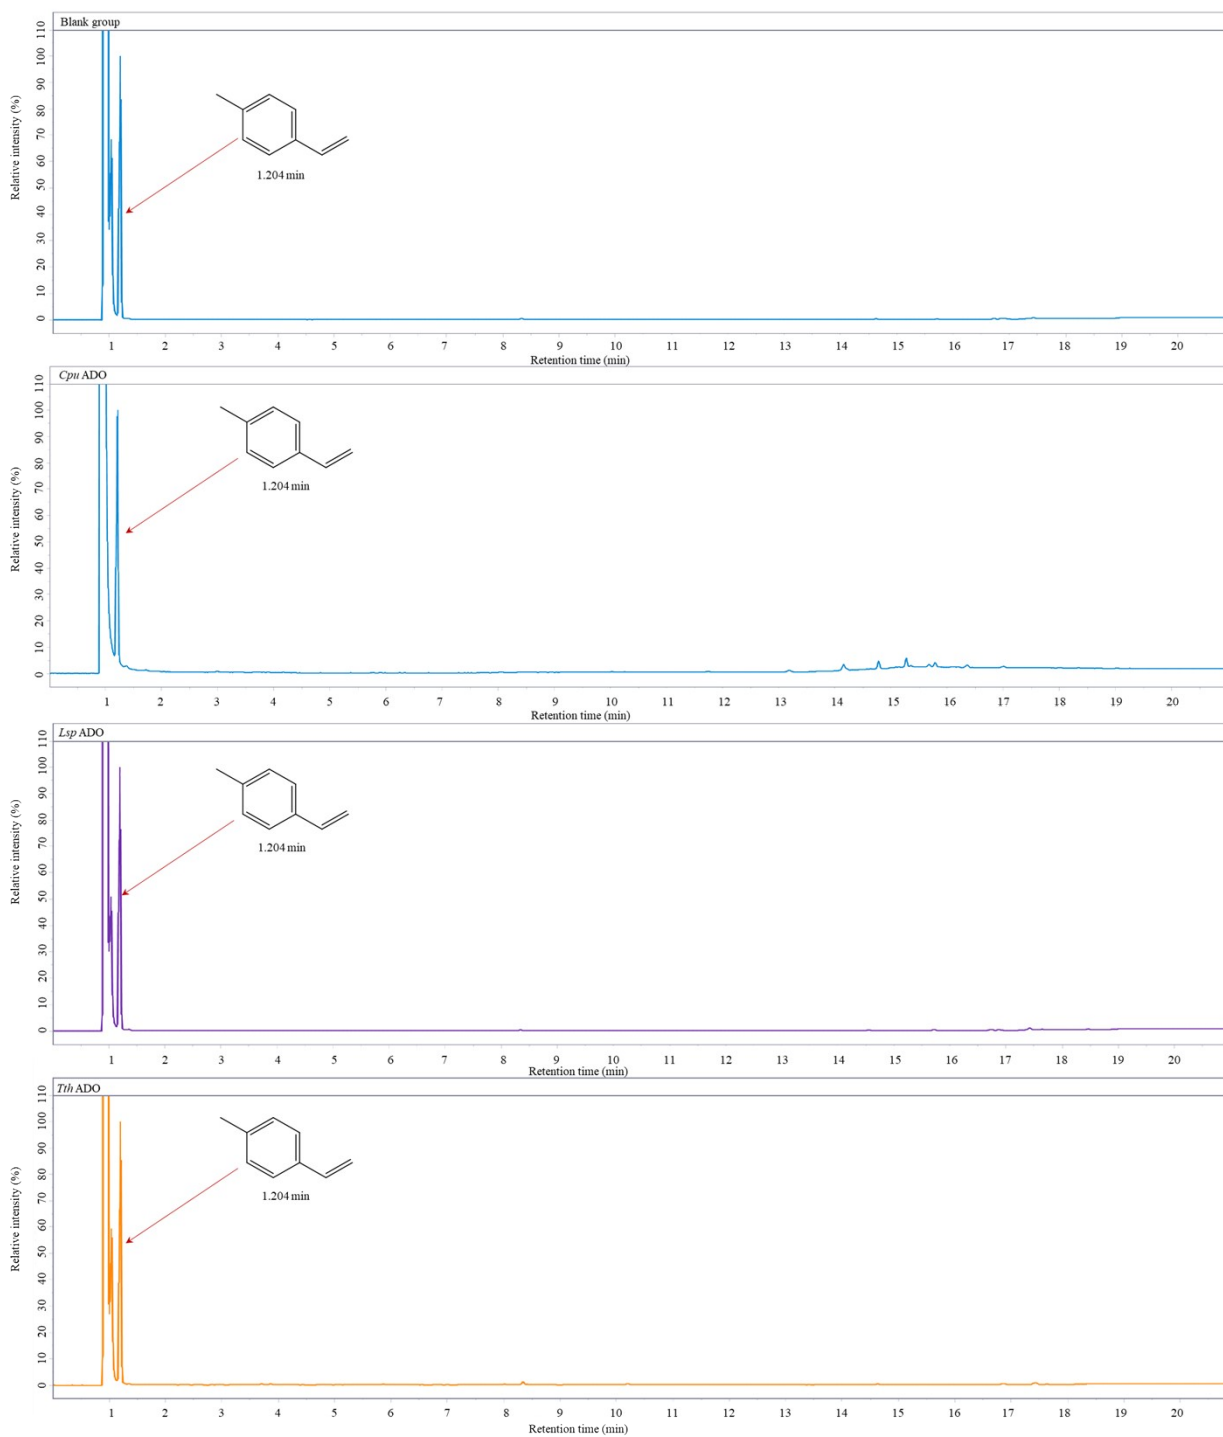

338

339

**Figure S24-19.** Gas chromatography results of the blank control group and different ADOs using 4-methylstyrene as substrate

340

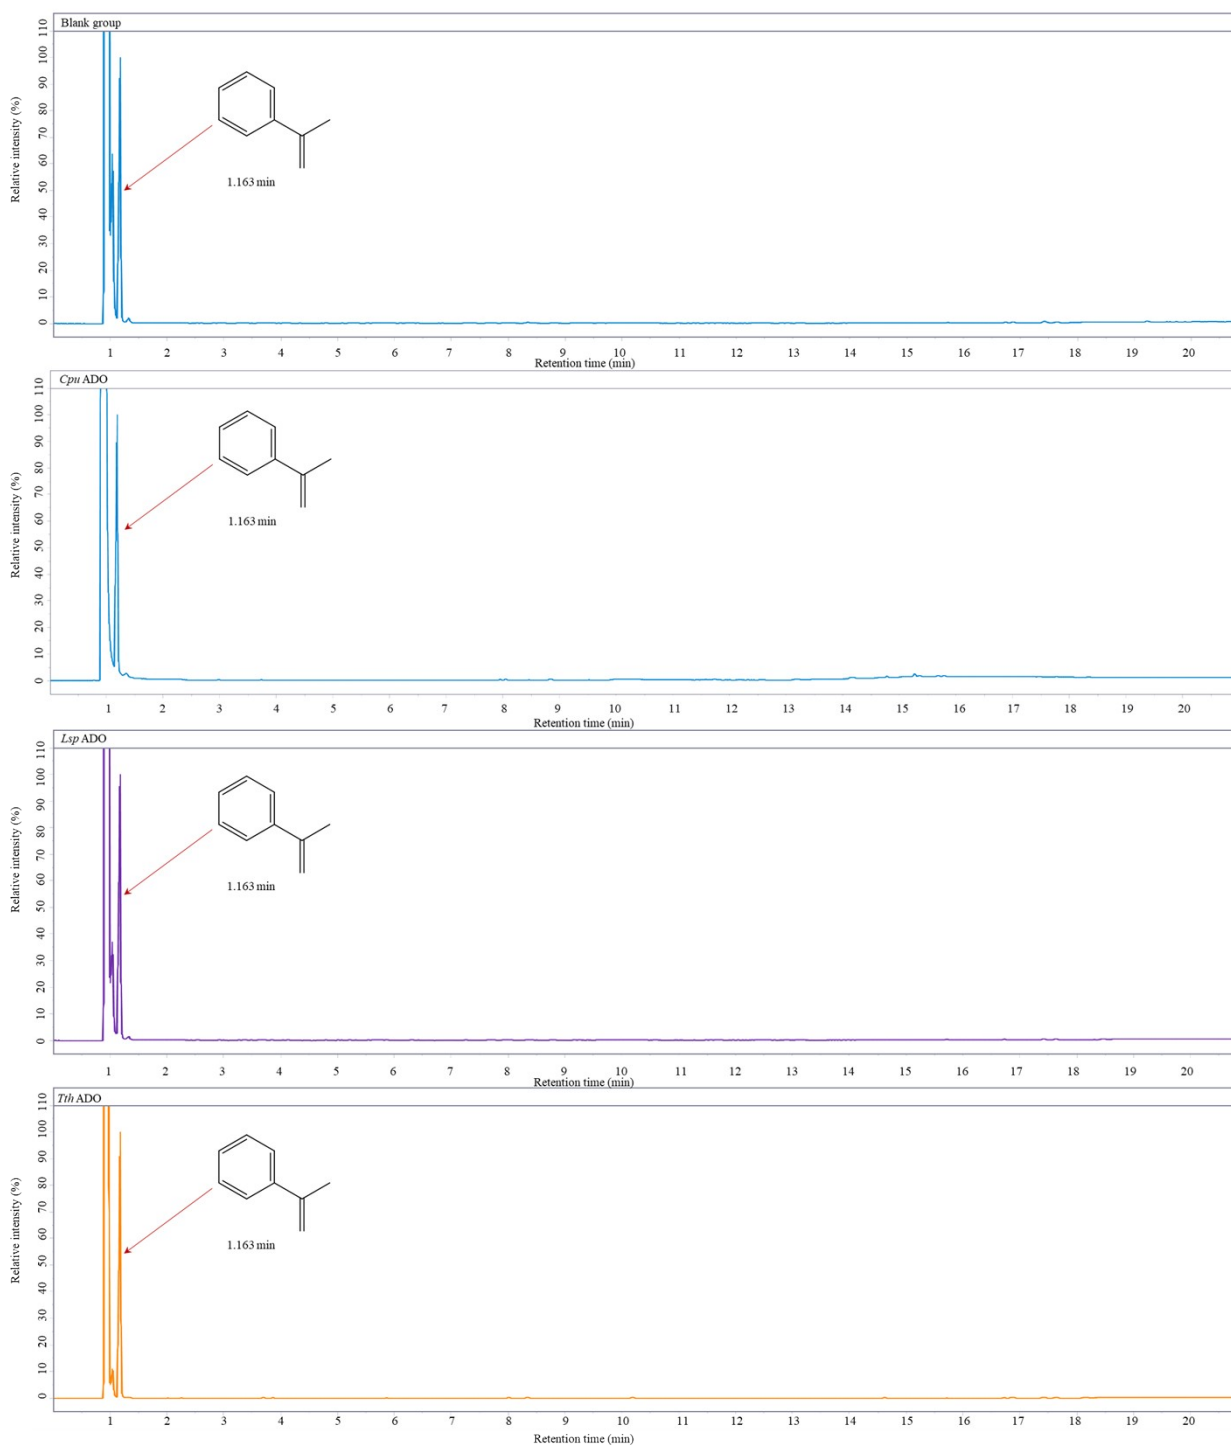

341  
342

**Figure S24-20.** Gas chromatography results of the blank control group and different ADOs using 2-phenylpropene as substrate

343  
344  
345

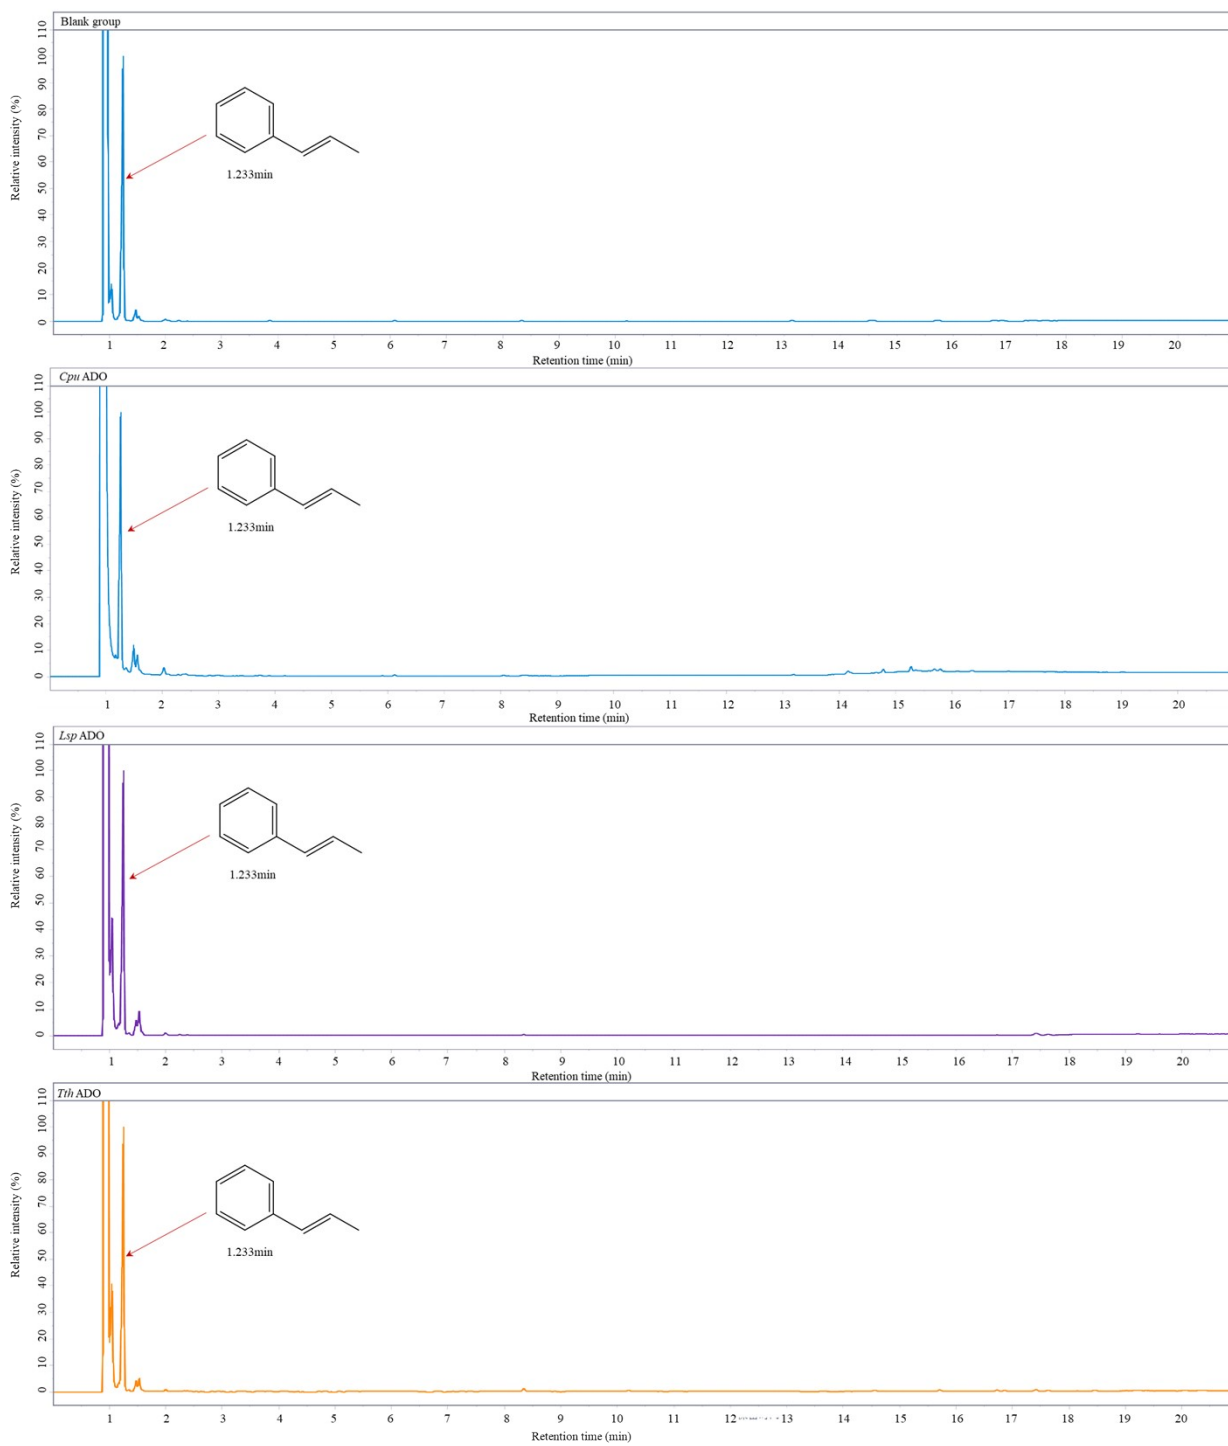

346

**Figure S24-21.** Gas chromatography results of the blank control group and different ADOs using 1-phenylpropene as substrate

347

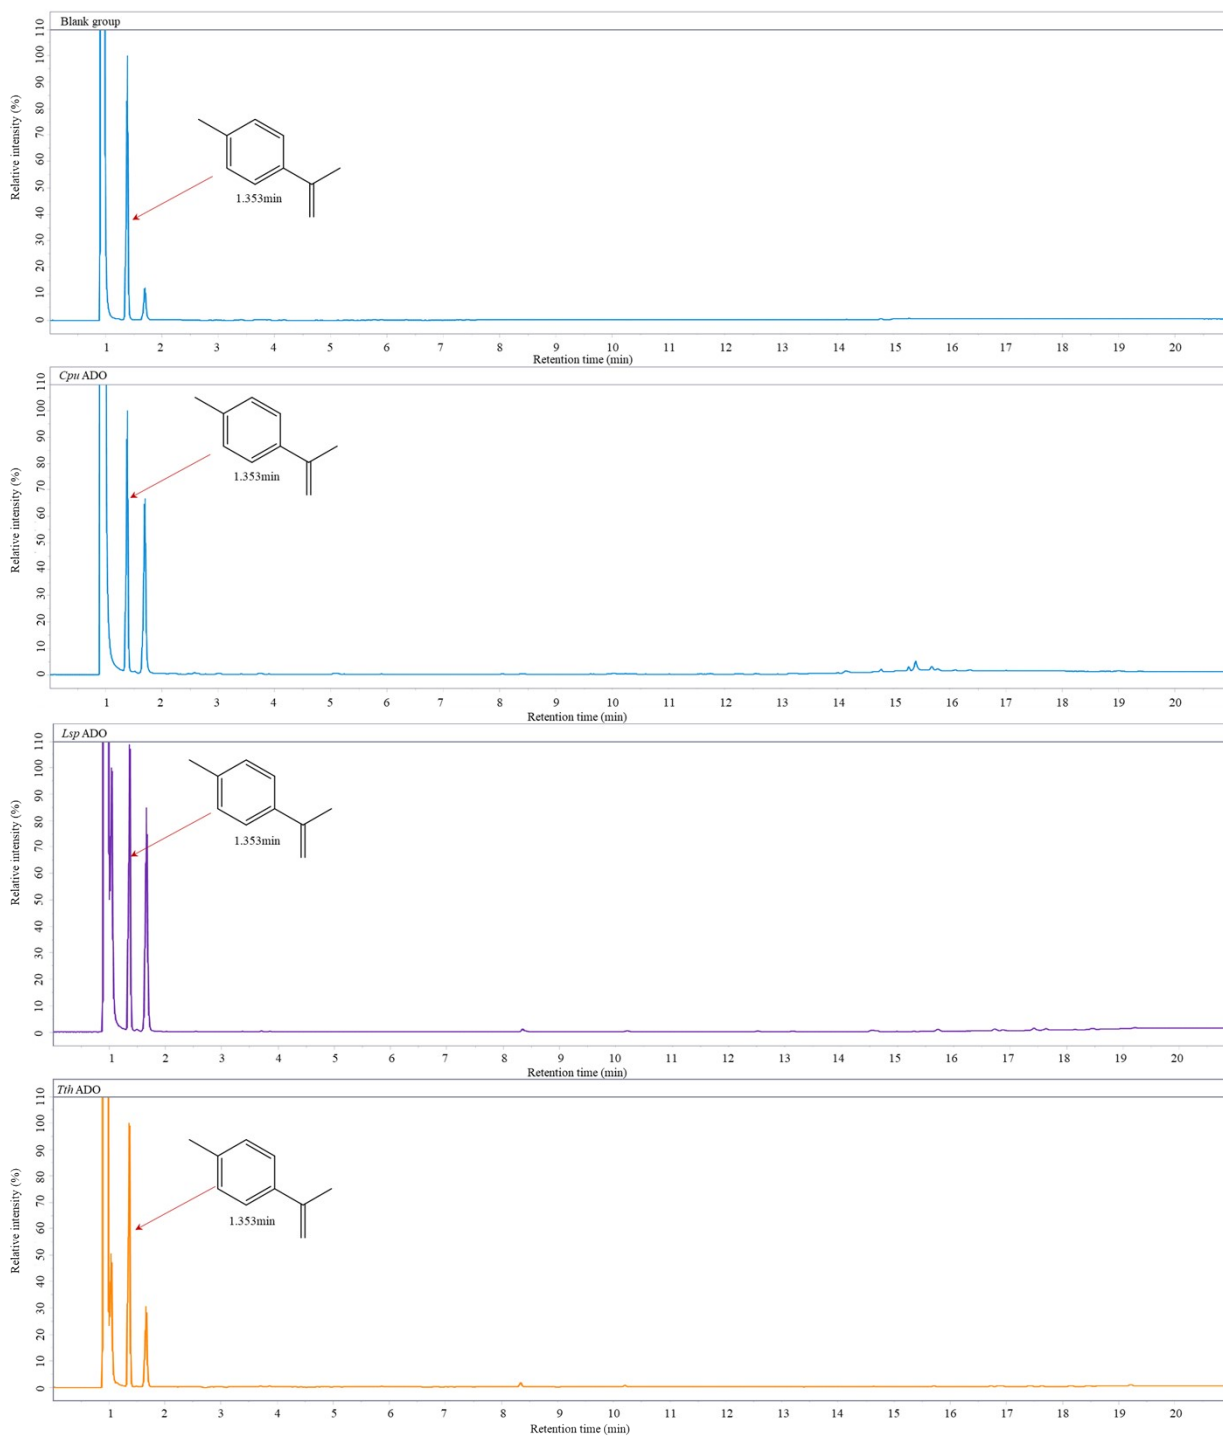

348

**Figure S24-22.** Gas chromatography results of the blank control group and different ADOs using 4-isopropenyltoluene as substrate

349

350

351

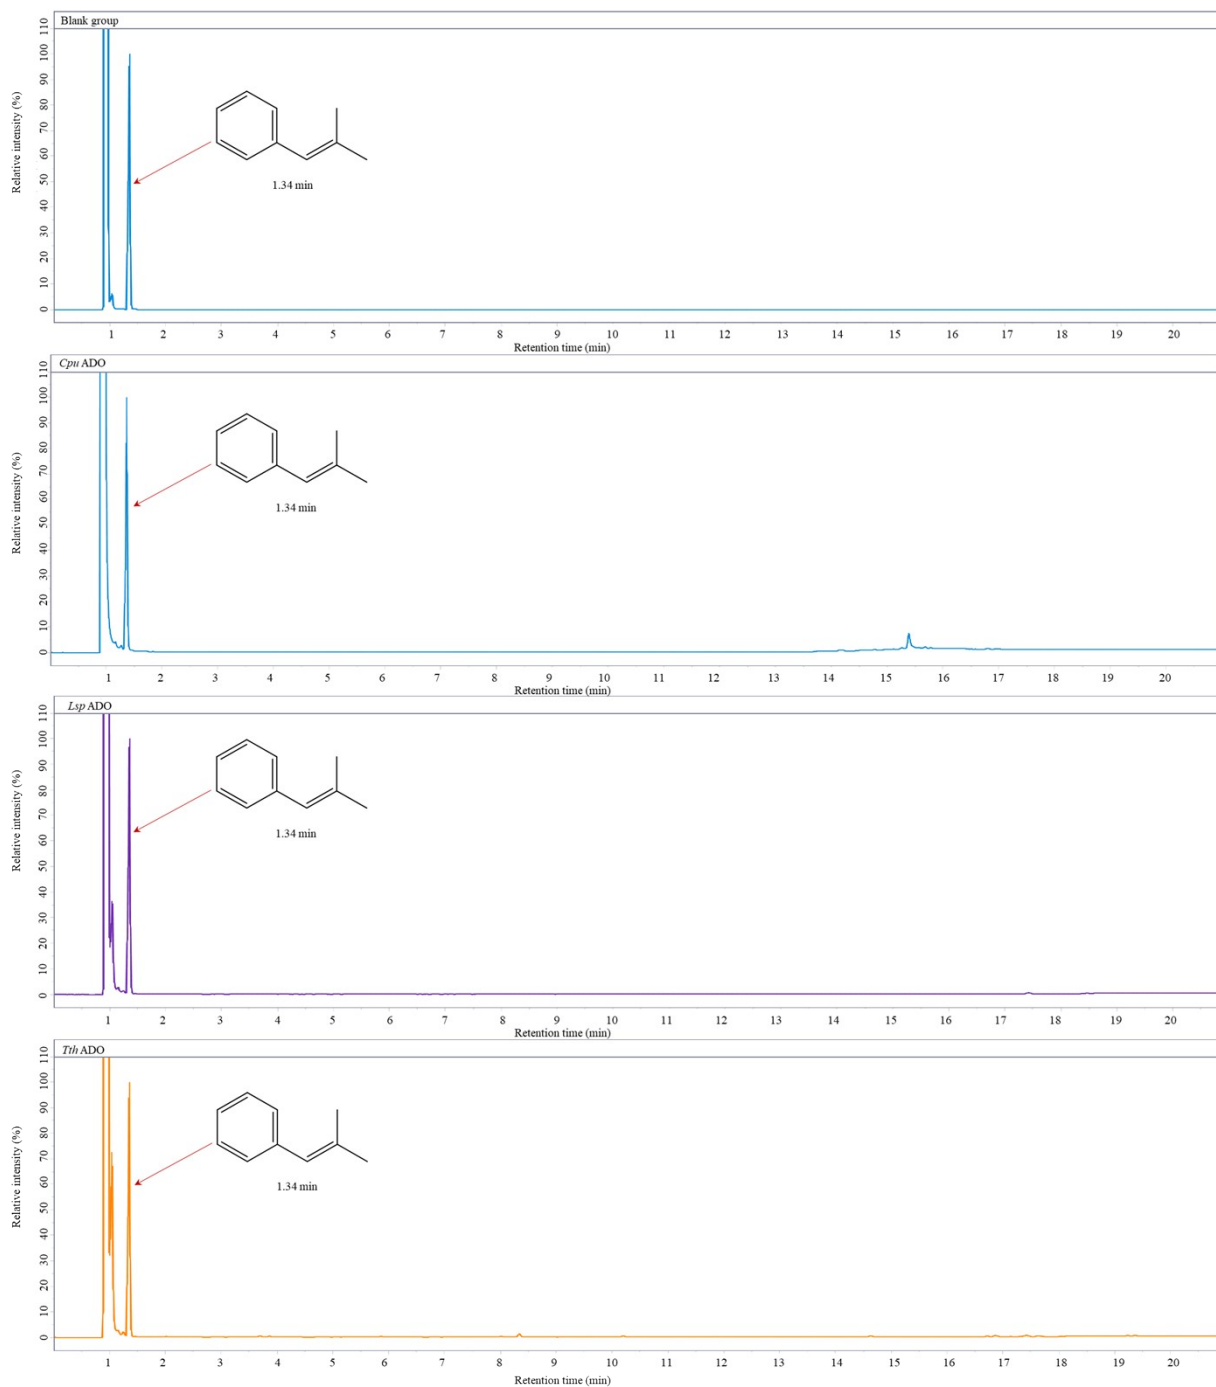

352

**Figure S24-23.** Gas chromatography results of the blank control group and different ADOs using 2-methyl-1-phenylpropene as substrate

353

354

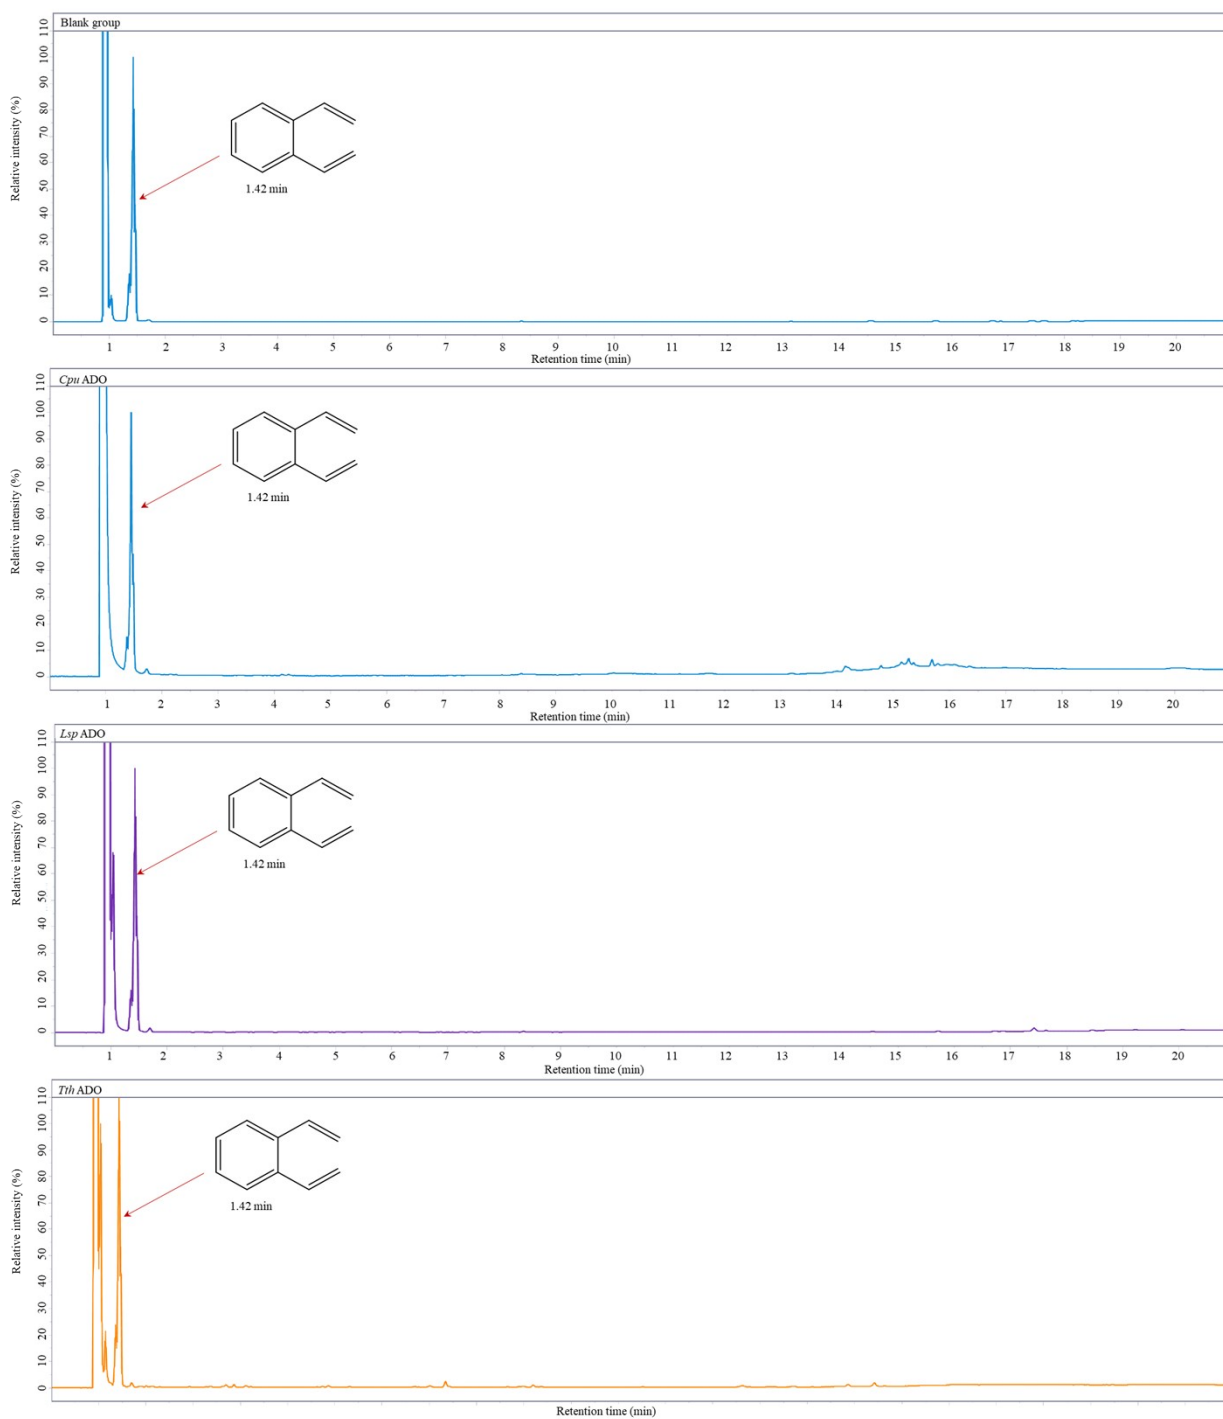

355

**Figure S24-24.** Gas chromatography results of the blank control group and different ADOs using 1,2-divinylbenzene as substrate

356

357

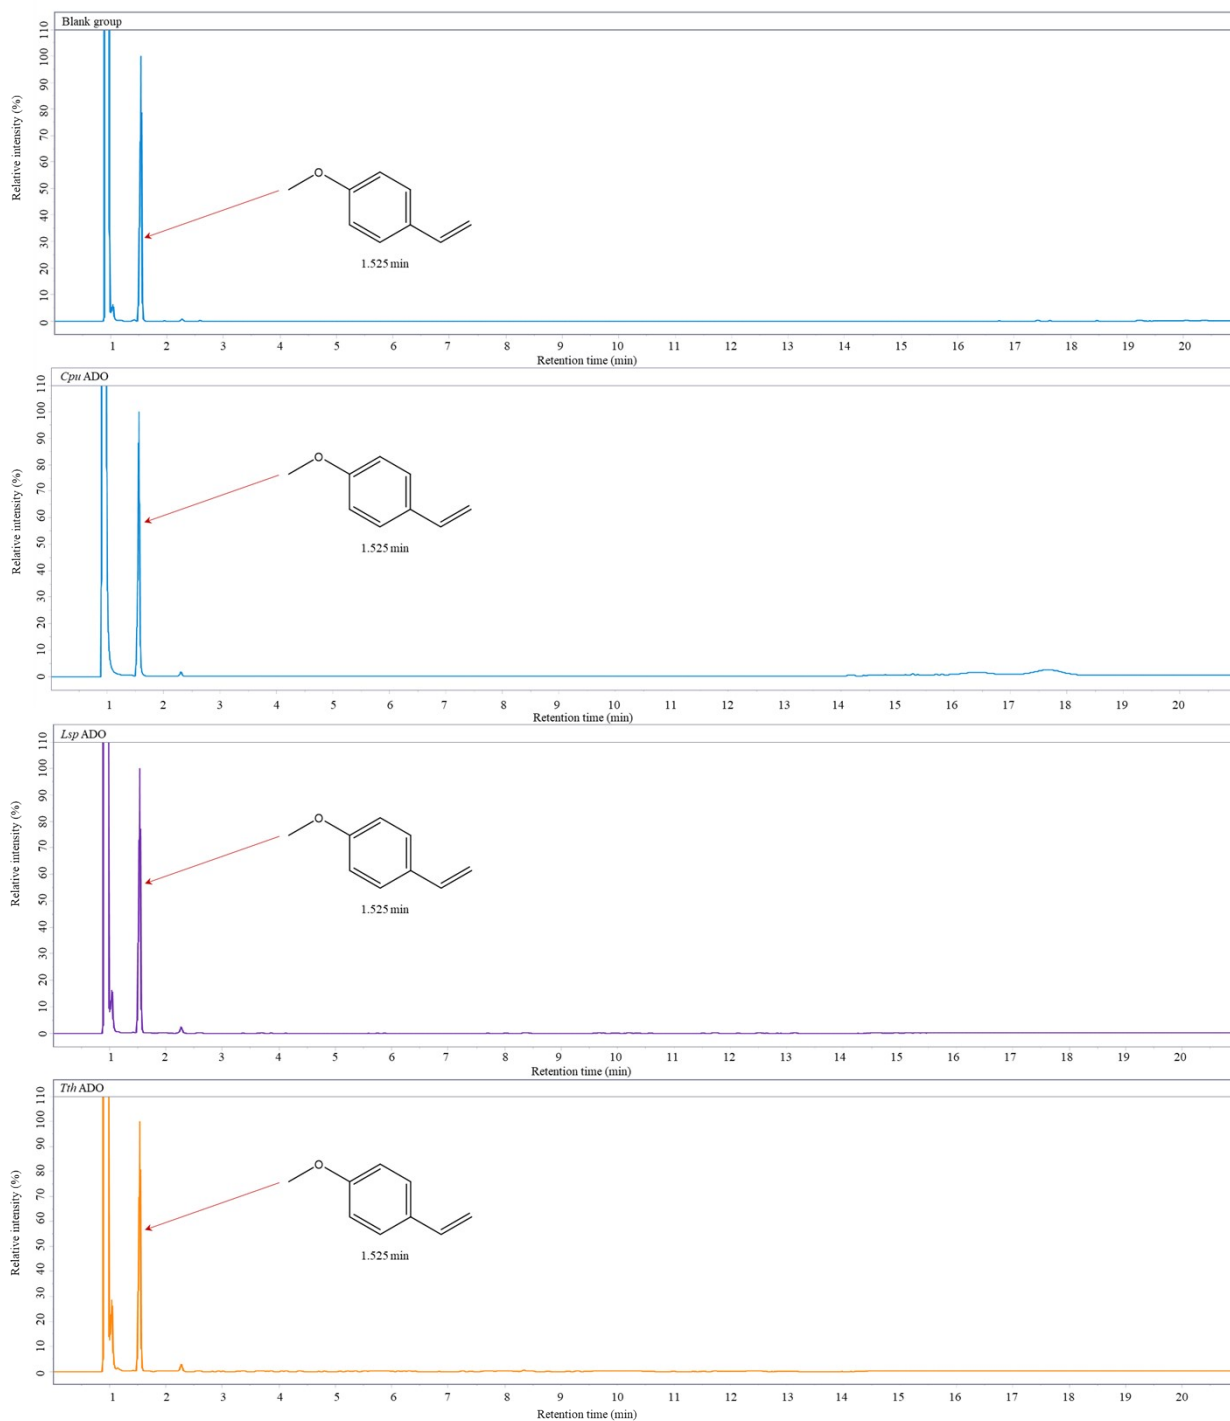

358  
359

**Figure S24-25.** Gas chromatography results of the blank control group and different ADOs using 4-methoxystyrene as substrate

360  
361  
362

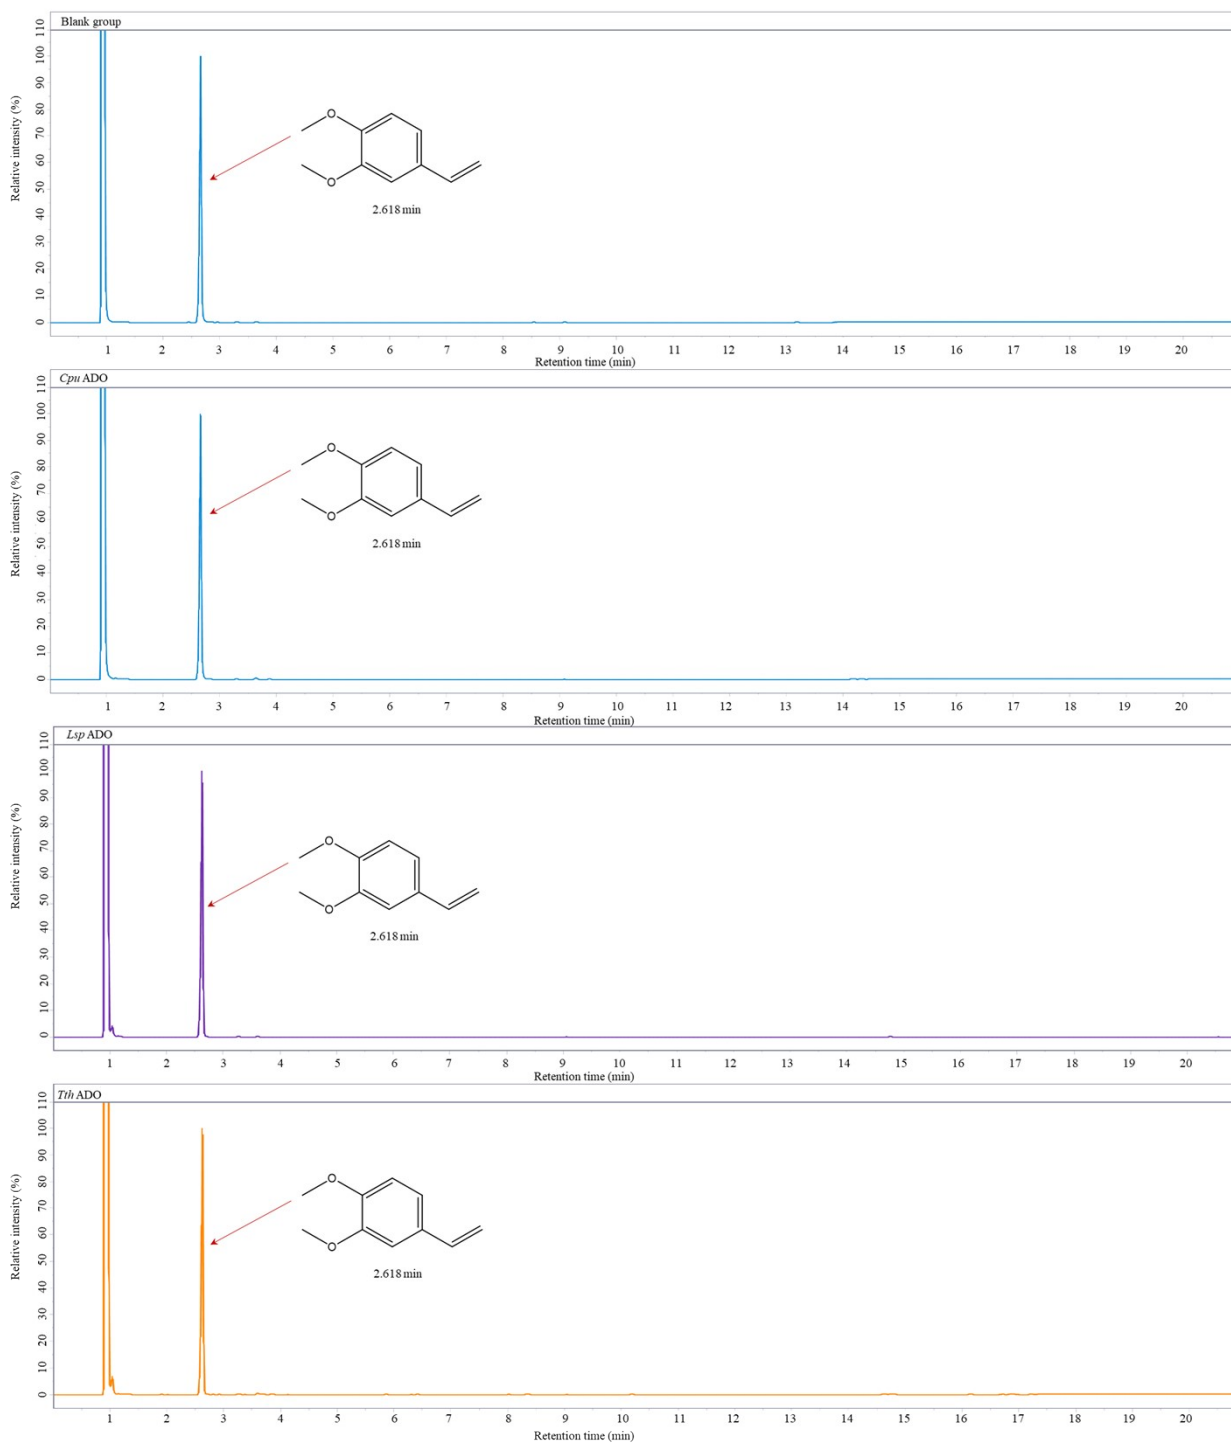

363

**Figure S24-26.** Gas chromatography results of the blank control group and different ADOs using 3,4-dimethoxystyrene as substrate

364

365

366

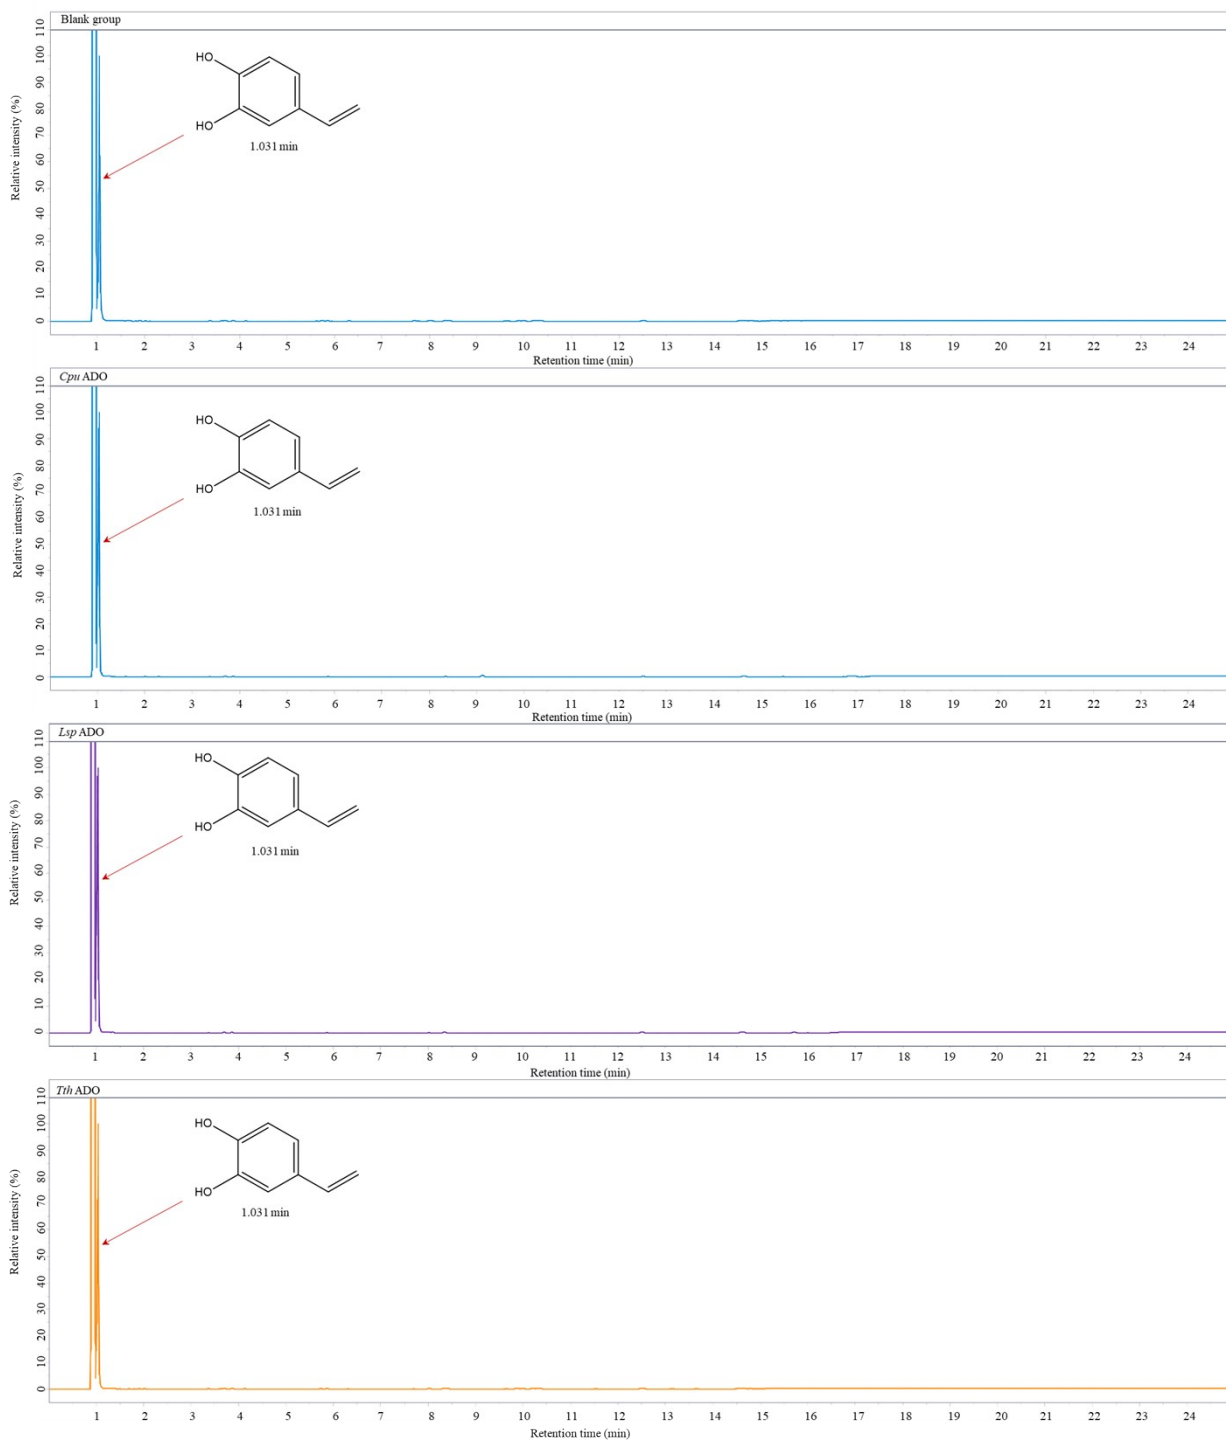

367

368

**Figure S24-27.** Gas chromatography results of the blank control group and different ADOs using 3,4-dihydroxystyrene as substrate

369

370

371

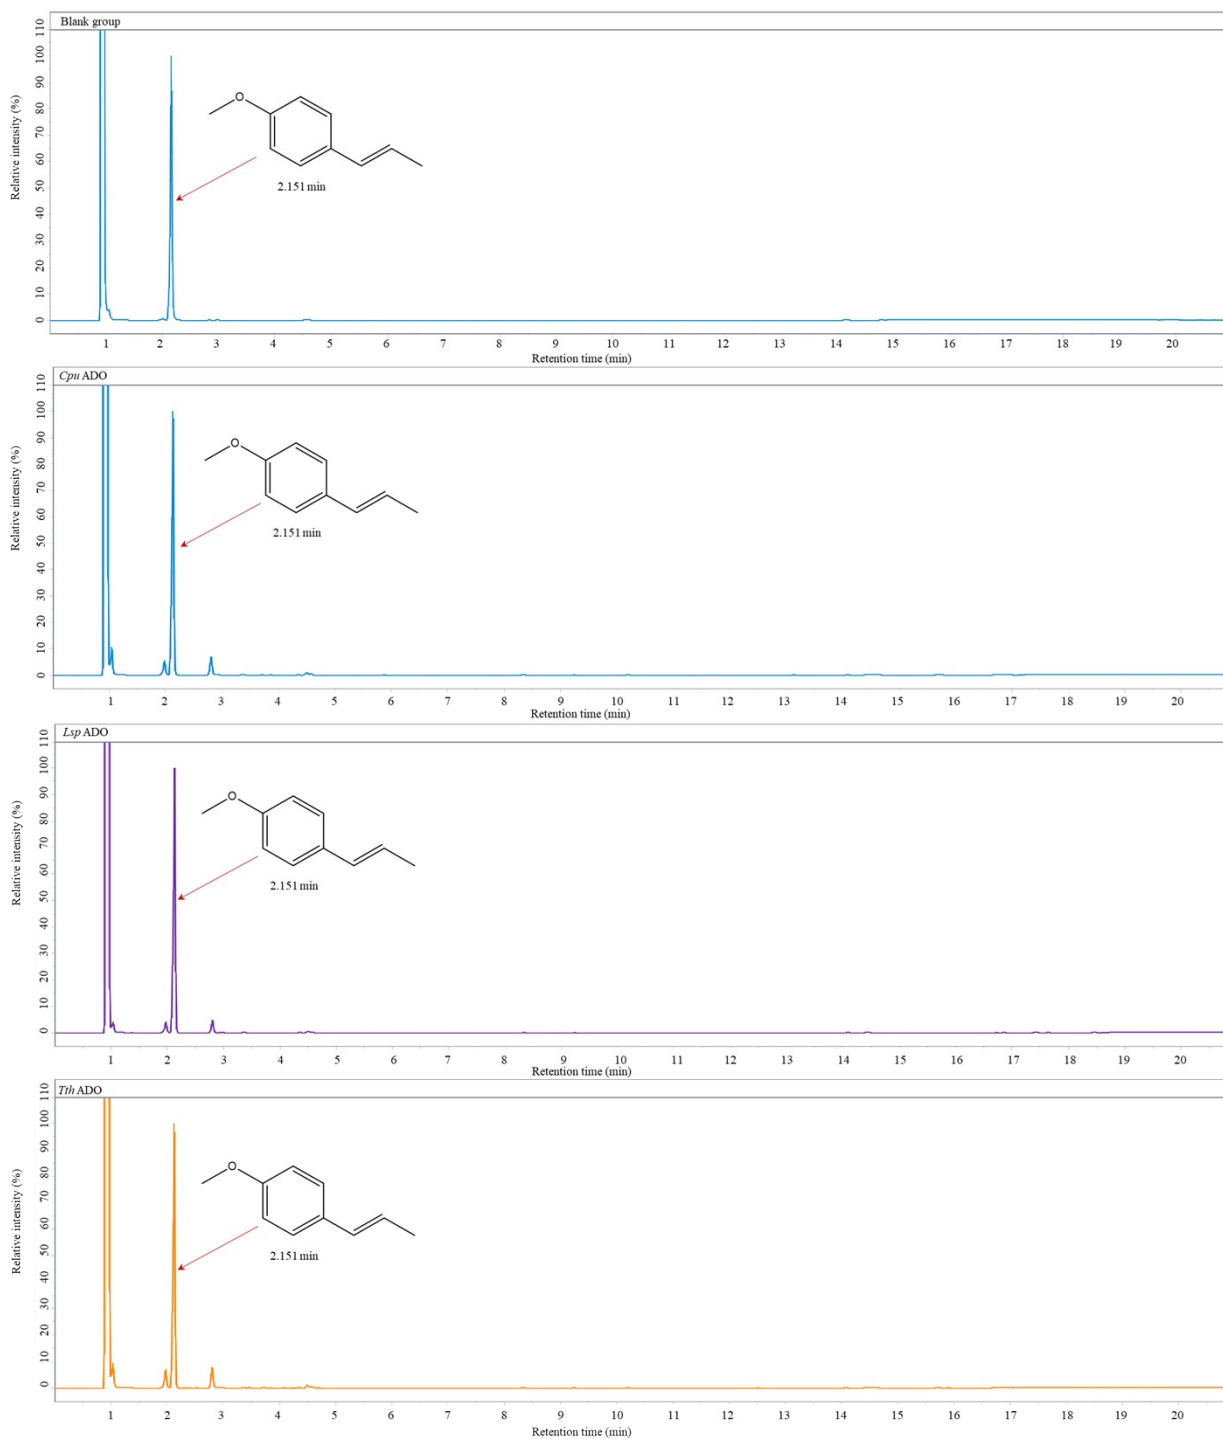

372

373

**Figure S24-28.** Gas chromatography results of the blank control group and different ADOs using trans-anethole as substrate

374

375

376

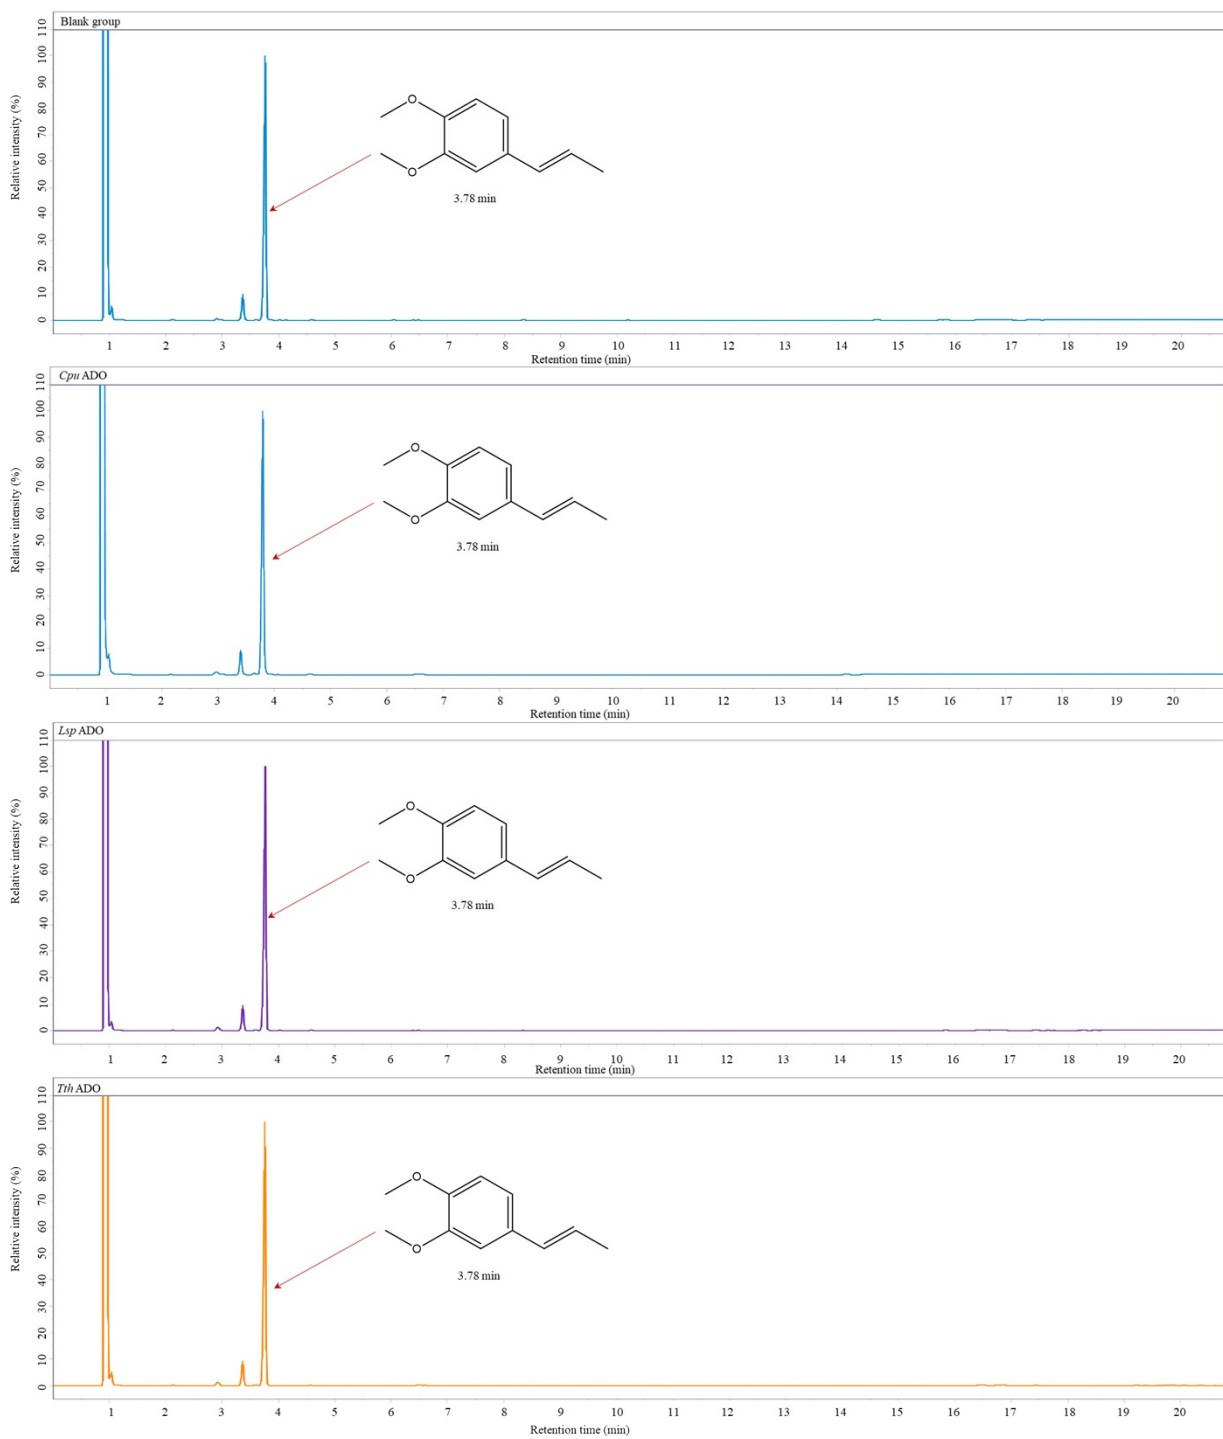

377

378

**Figure S24-29.** Gas chromatography results of the blank control group and different ADOs using methylisoeugenol as substrate

379

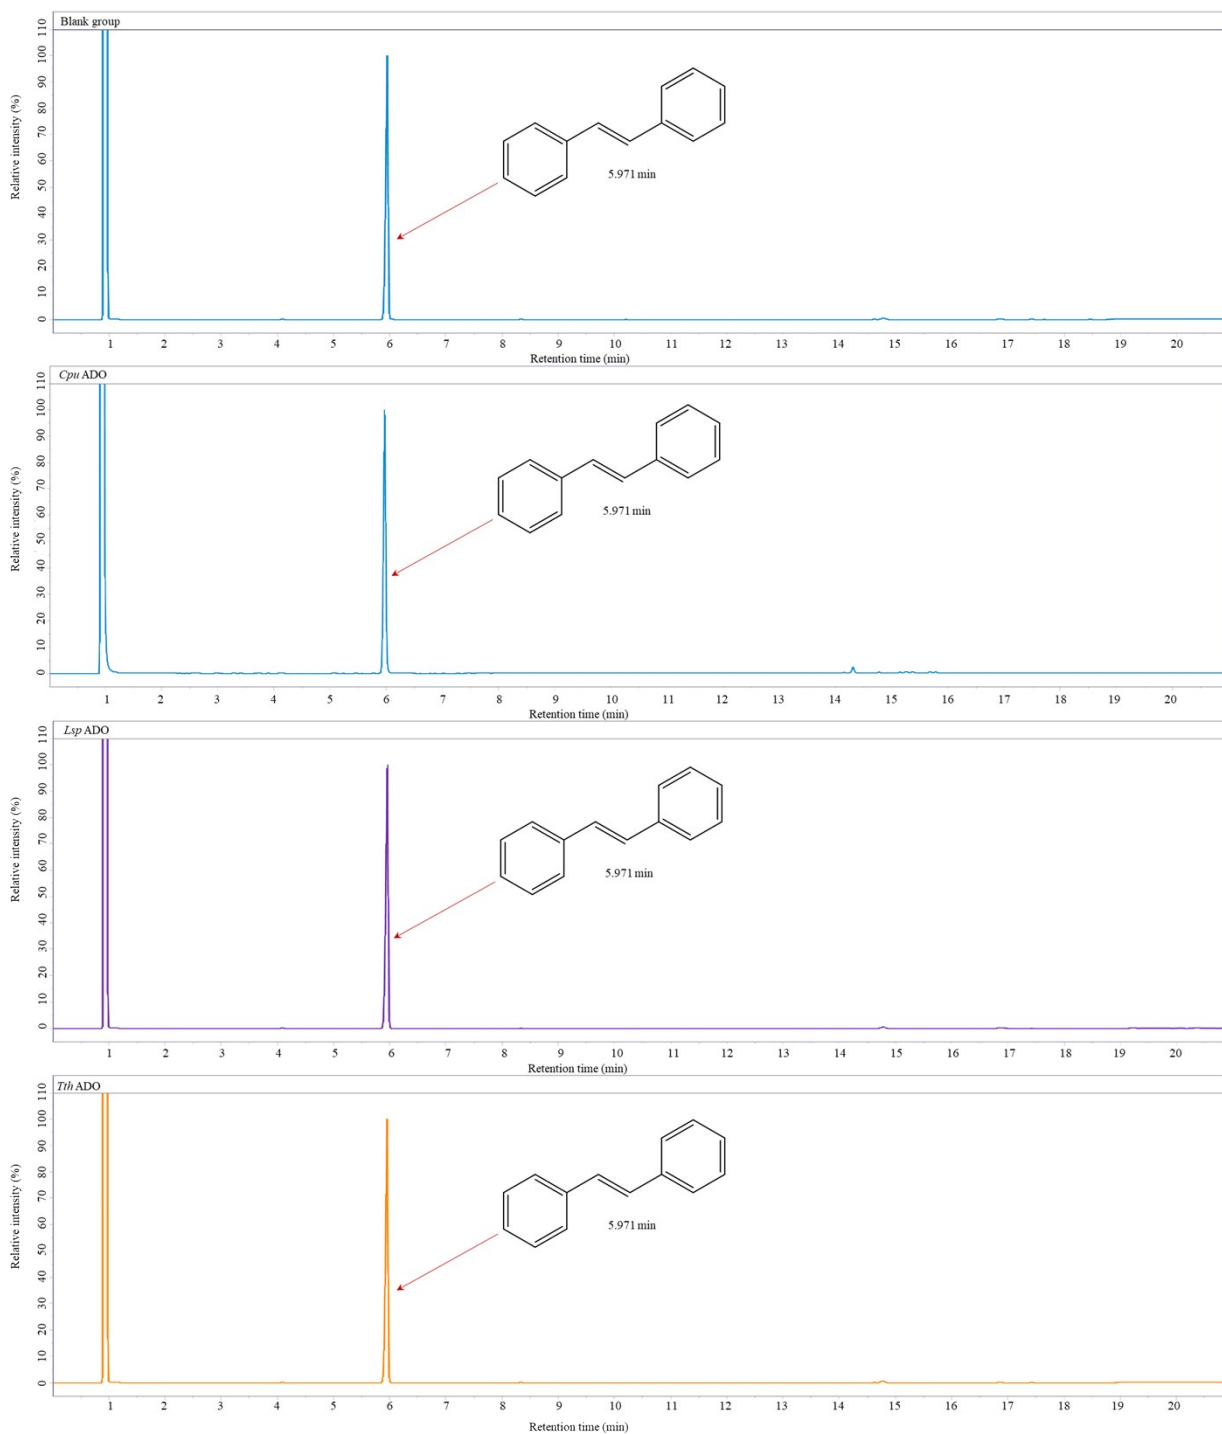

380

381

**Figure S24-30.** Gas chromatography results of the blank control group and different ADOs using trans-stilbene as substrate

382

383

384

385

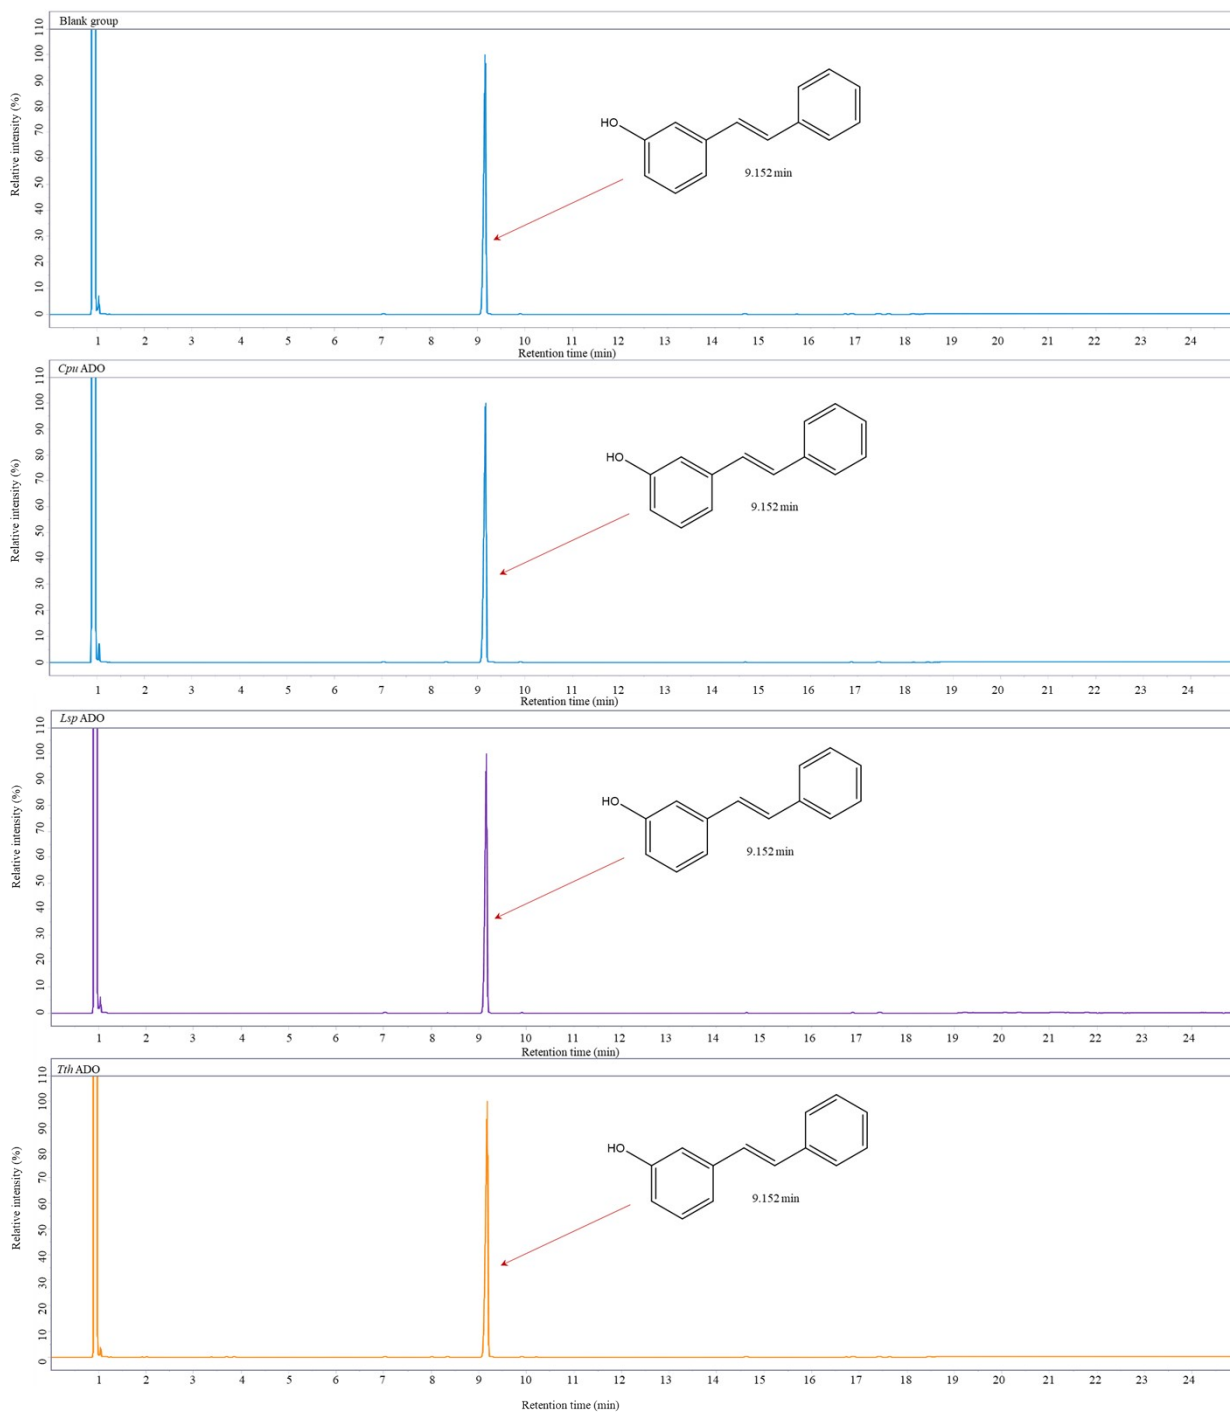

386

**Figure S24-31.** Gas chromatography results of the blank control group and different ADOs using 3-[(E)-2-phenylethenyl]phenol as substrate

387

388

389

390

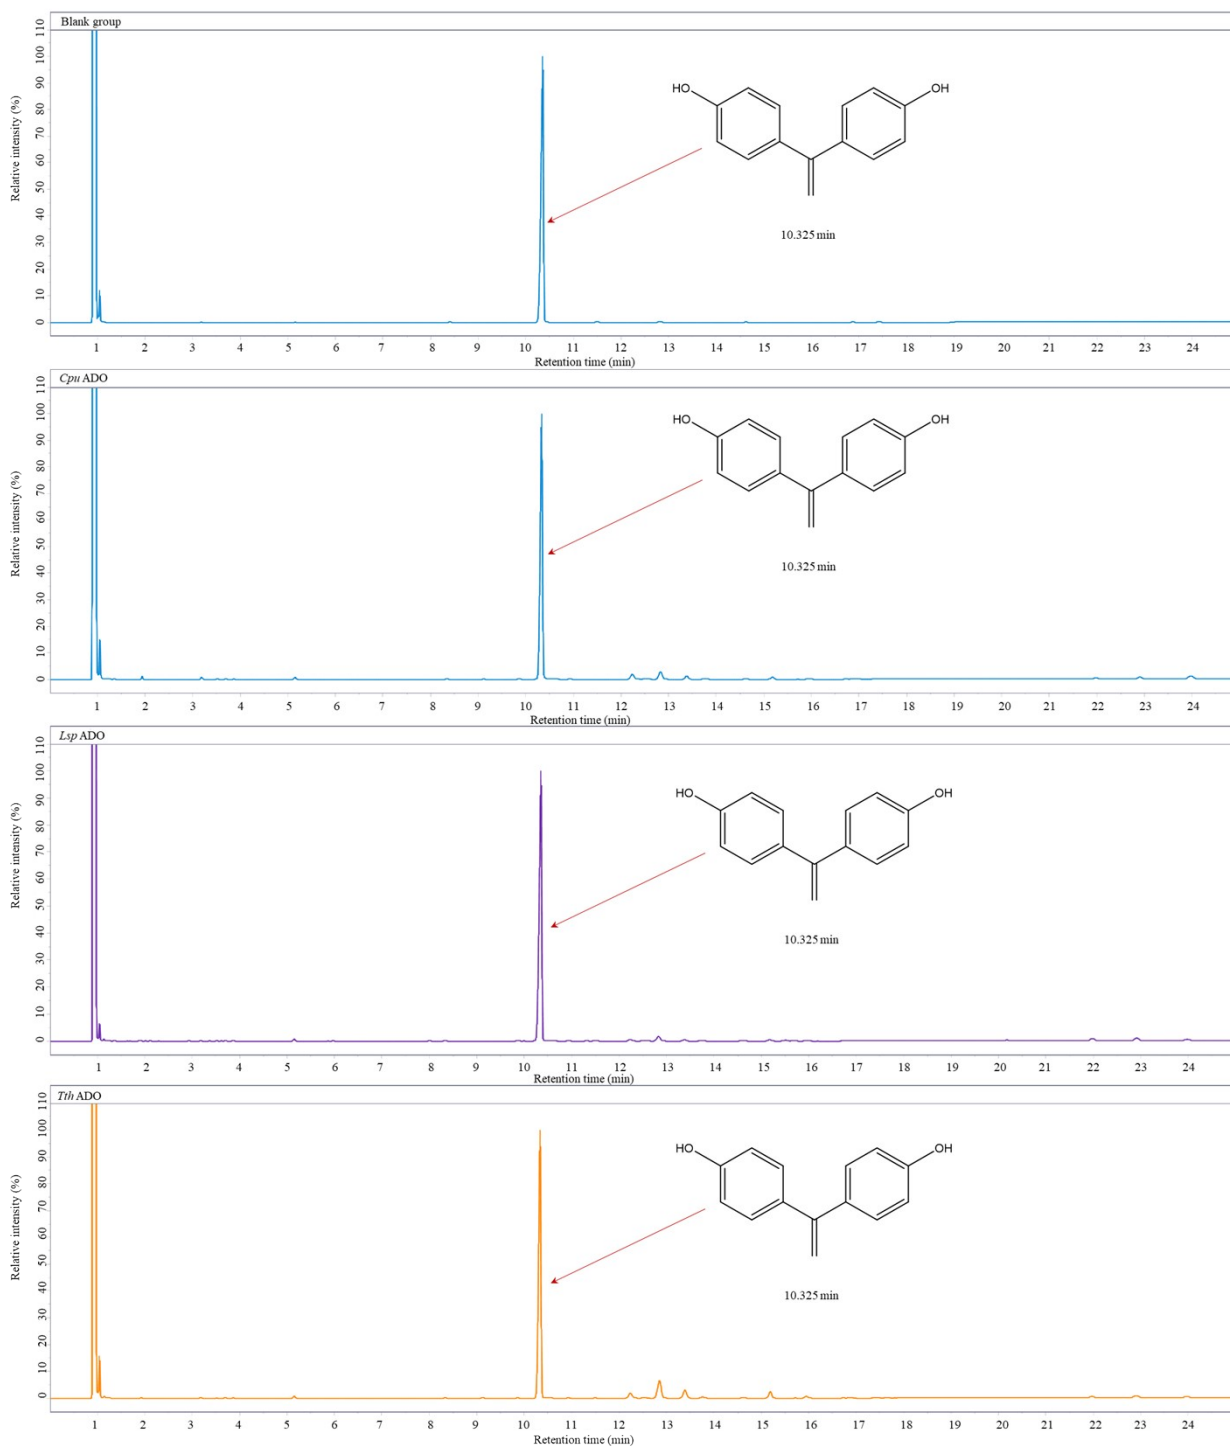

391

**Figure S24-32.** Gas chromatography results of the blank control group and different ADOs using 4,4'-vinylidenediphenol as substrate

392

393

394

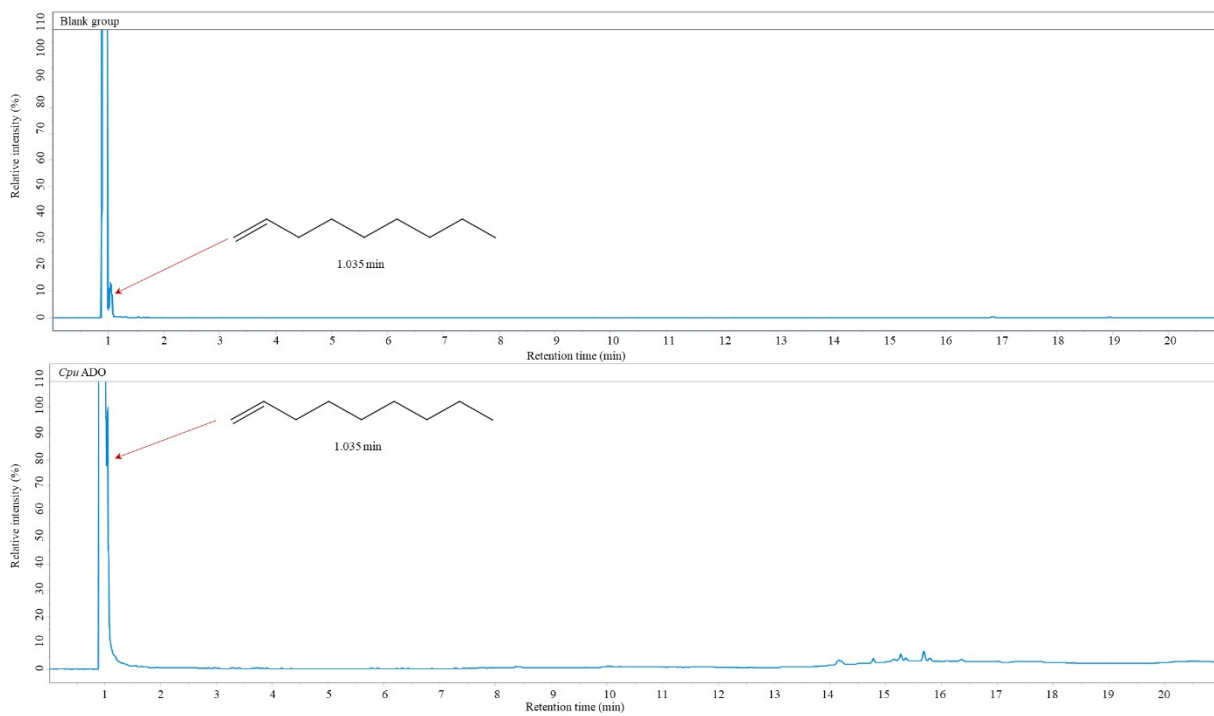

395  
396

397 **Figure S24-33.** Gas chromatography results of the blank control group and different ADOs using 1-nonene as  
398 substrate

399

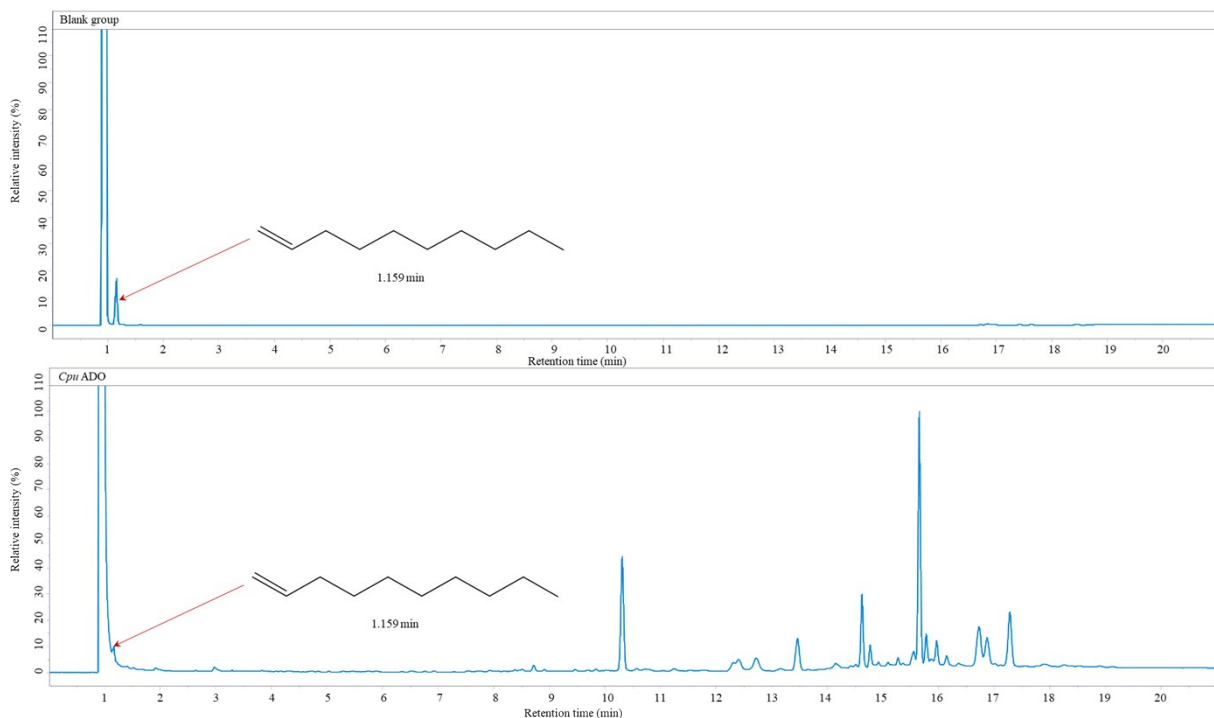

400  
401

402 **Figure S24-34.** Gas chromatography results of the blank control group and different ADOs using 1-decene as  
403 substrate

404

405  
406  
407

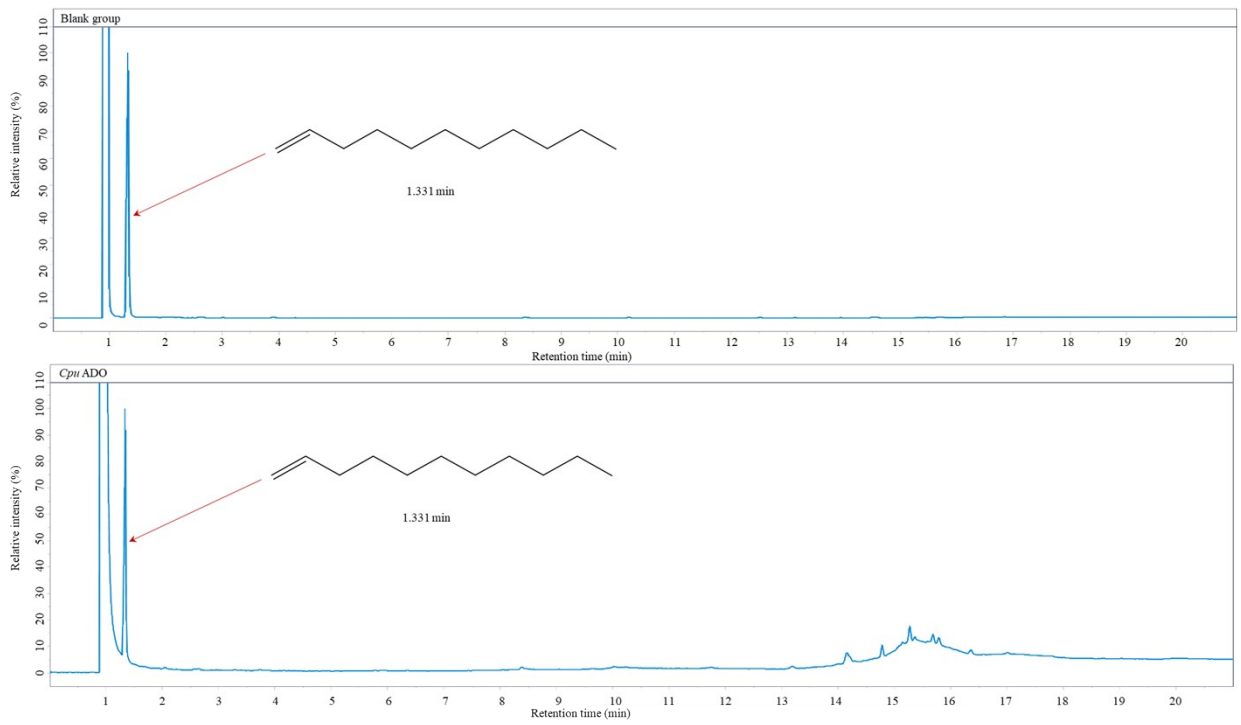

408

409 **Figure S24-35.** Gas chromatography results of the blank control group and different ADOs using 1-undecene as  
410 substrate

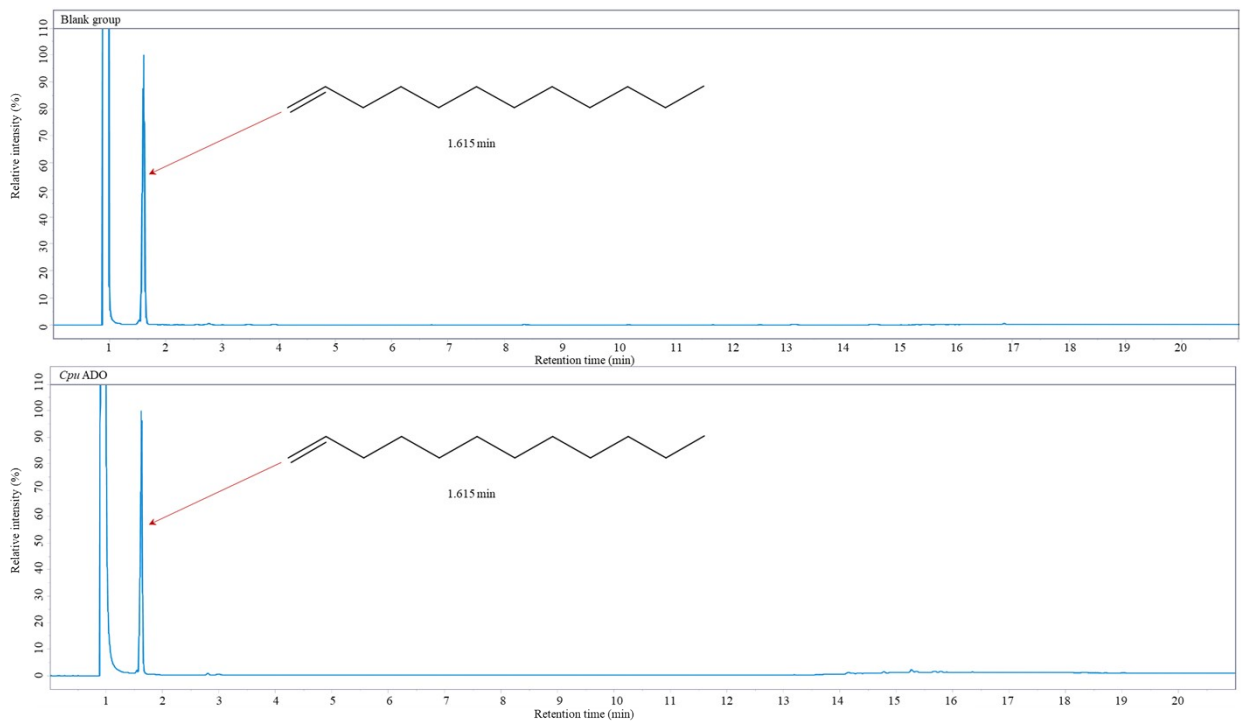

411

412 **Figure S24-36.** Gas chromatography results of the blank control group and different ADOs using 1-dodecene as  
413 substrate

414

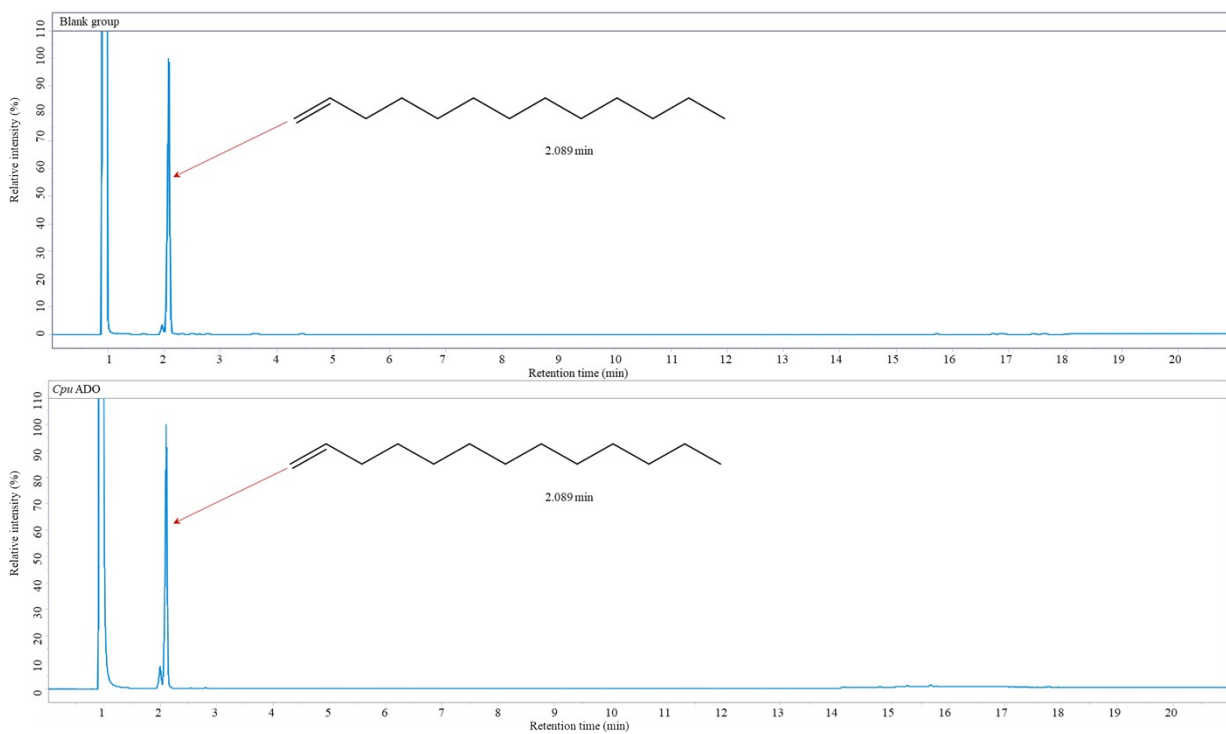

415

416

417 **Figure S24-37.** Gas chromatography results of the blank control group and different ADOs using 1- tridecene as

418 substrate

419

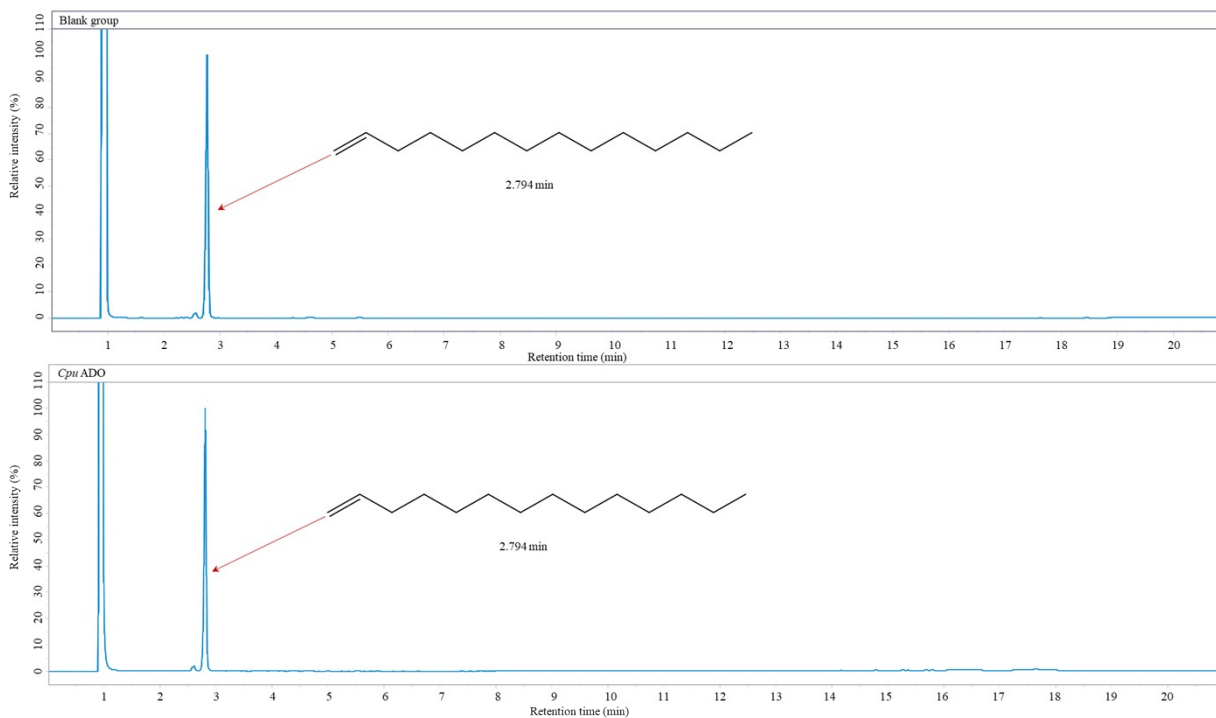

420

421

422 **Figure S24-38.** Gas chromatography results of the blank control group and different ADOs using 1-tetradecene as

423 substrate

424

425

426

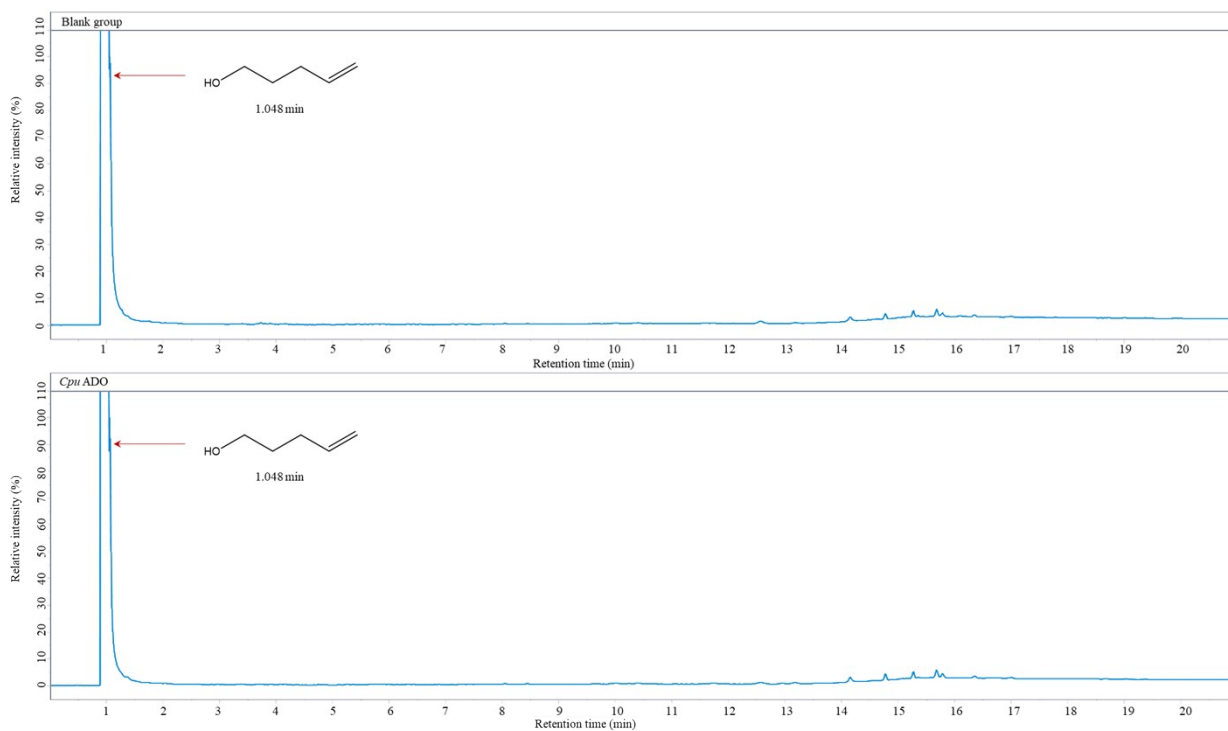

427

428 **Figure S24-39.** Gas chromatography results of the blank control group and different ADOs using 4-penten-1-ol as  
429 substrate

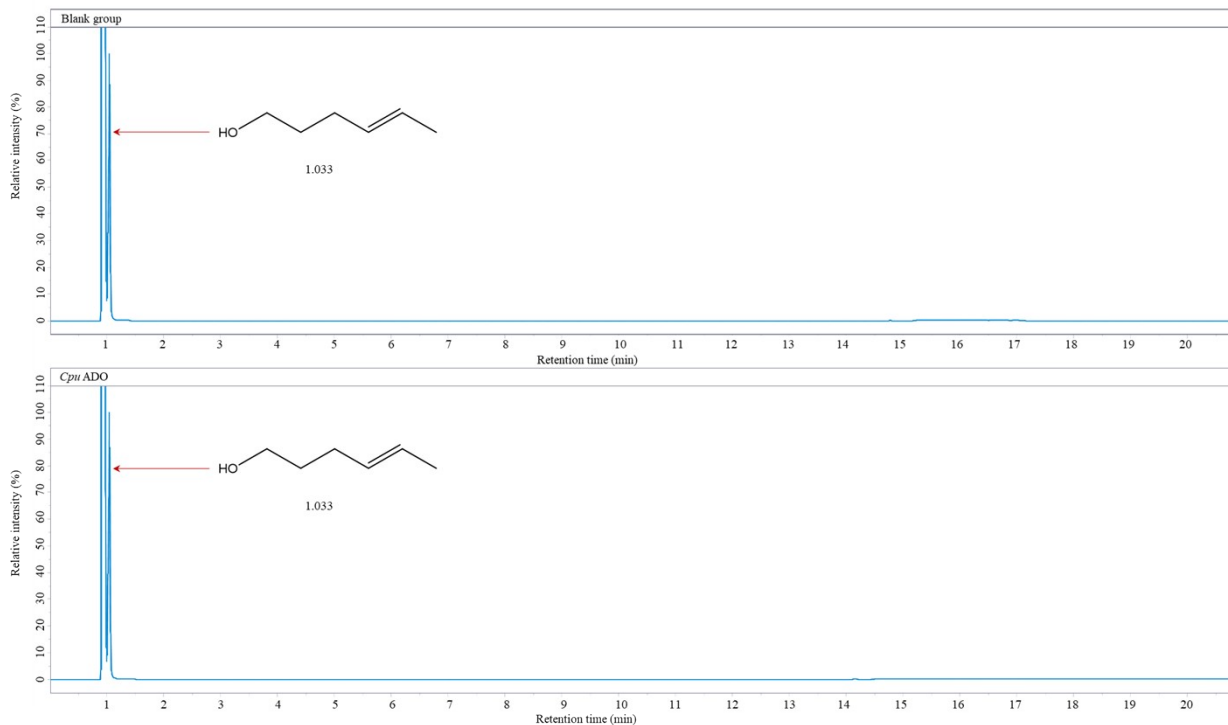

430

431 **Figure S24-40.** Gas chromatography results of the blank control group and different ADOs using 4-hexen-1-ol as  
432 substrate

433

434

435  
436  
437  
438

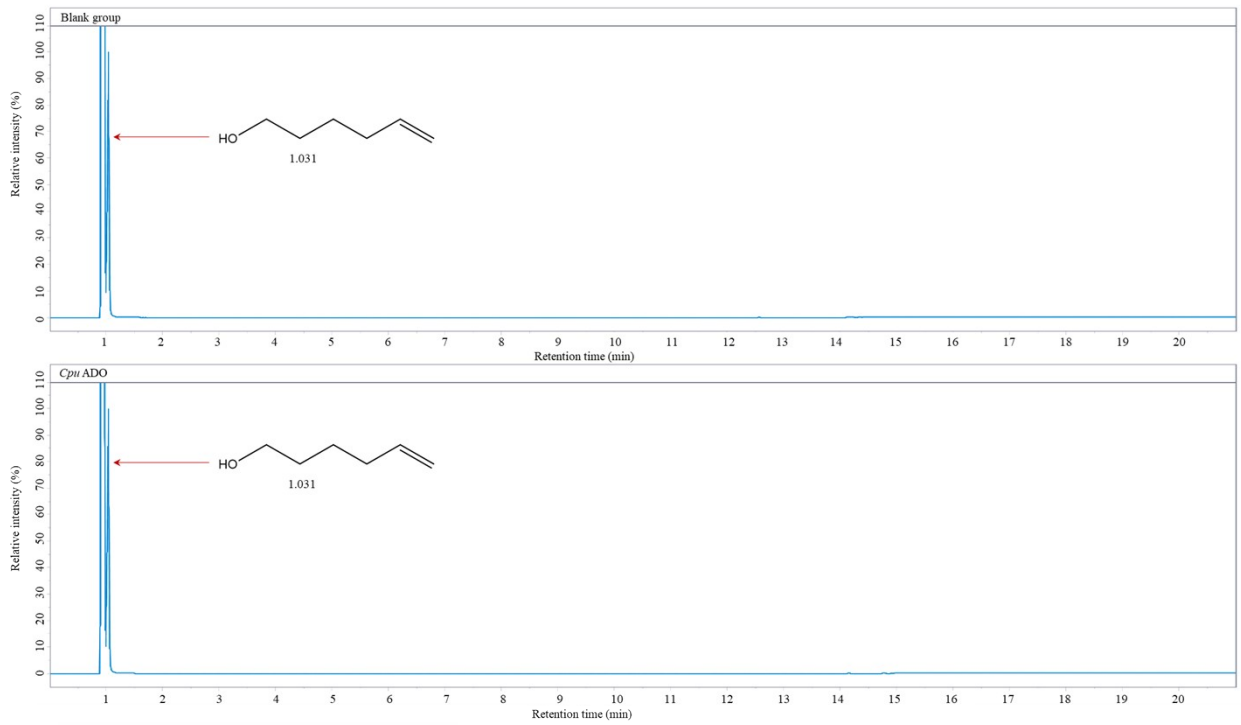

439  
440 **Figure S24-41.** Gas chromatography results of the blank control group and different ADOs using 5-hexen-1-ol as  
441 substrate

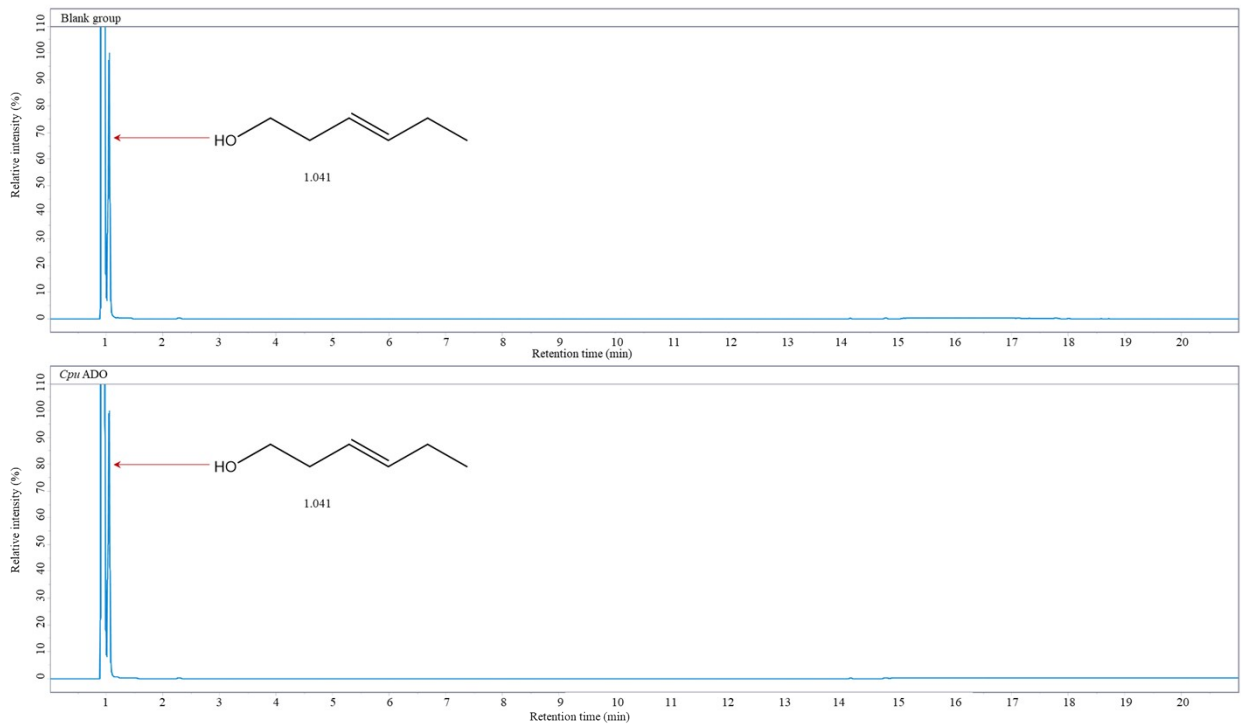

442  
443 **Figure S24-42.** Gas chromatography results of the blank control group and different ADOs using trans-3-hexen-1-  
444 ol as substrate

445 **Figure S24.** Gas chromatograms of reaction products catalyzed by wild-type ADOs with different substrates in  
446 substrate scope analysis.  
447  
448  
449  
450
